# Supplementary material for: Synthesis, structure and stereodynamics of atropisomeric N-chloroamides
Source: Royal Society of Chemistry journal article supplement (doi:10.1039/d4cc00268g), 2024-01-01

## Supporting Information

### Contents

|           |                                                                                          |            |
|-----------|------------------------------------------------------------------------------------------|------------|
| <b>1.</b> | <b>General Information</b>                                                               | <b>S2</b>  |
| <b>2.</b> | <b>General Procedures</b>                                                                | <b>S3</b>  |
| <b>3.</b> | <b>Experimental Procedures</b>                                                           | <b>S4</b>  |
| 3.1.      | <i>Synthesis of Secondary Amide Starting Materials</i>                                   | <b>S4</b>  |
| 3.2.      | <i>Synthesis of Chloroamides and Evaluation of Configurational Stability</i>             | <b>S13</b> |
| 3.3.      | <i>Synthesis of N-Alkyl Amides</i>                                                       | <b>S42</b> |
| 3.4.      | <i>Correlation of Racemization Rates with Charton Parameters and <math>\theta</math></i> | <b>S47</b> |
| <b>4.</b> | <b>X-Ray Crystallography</b>                                                             | <b>S51</b> |
| <b>5.</b> | <b>Computational Modelling</b>                                                           | <b>S61</b> |
| 5.1.      | <i>Computational Methods</i>                                                             | <b>S61</b> |
| 5.2.      | <i>Investigation of solvent effect on racemization and amide rotation barriers</i>       | <b>S61</b> |
| 5.3.      | <i>Summary of additional geometrical parameters</i>                                      | <b>S62</b> |
| 5.4.      | <i>Summary of the associated computational dataset contents</i>                          | <b>S62</b> |
| <b>6.</b> | <b>References</b>                                                                        | <b>S67</b> |
| <b>7.</b> | <b>NMR Spectra</b>                                                                       | <b>S68</b> |

## 1. General Information

Reactions were carried out under an atmosphere of nitrogen unless stated otherwise. Temperatures of 0 °C were obtained using an ice/water bath. Heating was achieved using an oil bath equipped with a contact thermometer.

Anhydrous CH<sub>2</sub>Cl<sub>2</sub> and dimethylformamide (DMF) were purchased from Acros. All other solvents and reagents were used as supplied without prior purification.

Thin layer chromatography was performed on Merck Kieselgel 60 F<sub>254</sub> 0.25 mm pre-coated aluminium plates. Product spots were visualized under UV light ( $\lambda = 254$  nm) and/or by staining with potassium permanganate solution. Flash chromatography was performed using VWR silica gel 60 (40-63  $\mu$ m particle size) using head pressure by means of a nitrogen line.

<sup>1</sup>H, <sup>13</sup>C, and <sup>19</sup>F NMR spectra were recorded using a Bruker Avance III 300 MHz, Bruker Avance II 400 MHz, Bruker Avance 500 MHz, or a Bruker Avance III HD 700 MHz, in the deuterated solvent stated, using the residual non-deuterated solvent signal as an internal reference. Chemical shifts are quoted in ppm with signal splittings recorded as singlet (s), doublet (d), triplet (t), quartet (q), quintet (qn), sextet (sext), septet (sept), octet (oct), nonet (non) and multiplet (m). The abbreviation br denotes broad. Coupling constants, *J*, are measured to the nearest 0.1 Hz and are presented as observed.

Infrared spectra were recorded on a PerkinElmer UATR Two spectrometer with attenuated total reflectance. Absorption maxima ( $\lambda_{\text{max}}$ ) are reported in wavenumbers (cm<sup>-1</sup>).

HRMS was recorded on a Waters Xevo G2-XS Quadrupole Time-of-Flight (QToF) spectrometer equipped with a Waters Acquity UPLC i-Class LC system, under conditions of electrospray ionisation (ESI). The mass reported is that containing the most abundant isotopes, with each value rounded to 4 decimal places and within 10 ppm of the calculated mass.

Chiral normal phase HPLC was performed on a Dionex Ultimate 3000 HPLC unit equipped with UV-vis diode-array detector, fitted with the appropriate Daicel Chiralpak column (dimensions: 0.46 cm  $\phi$  x 25 cm) along with the corresponding guard column (0.4 cm  $\phi$  x 1 cm). Wavelengths ( $\lambda$ ) are reported in nm, retention times ( $t_R$ ) are reported in minutes and solvent flow rates are reported in mL min<sup>-1</sup>.

## 2. General procedures

### 2.1 General Procedure A: Chlorination of Secondary Amides

To a round bottomed flask, equipped with a stirrer bar was added trichloroisocyanuric acid (1.1 eq.) and CH<sub>2</sub>Cl<sub>2</sub> (9.1 mL/mmol). The resulting stirred suspension was cooled to 0 °C and the appropriate secondary amide **1a-I** (1 eq.) was added portion wise. Following the addition, the ice-bath was removed and the reaction was stirred for 30 mins at room temperature. The reaction was then diluted with water, the layers separated, and the aqueous layer extracted twice with CH<sub>2</sub>Cl<sub>2</sub>. The combined organics were dried over MgSO<sub>4</sub>, filtered, and concentrated *in vacuo*. The crude residue was purified via column chromatography (see experimental methods section for details).

### 2.2 General Procedure B: Determination of Racemisation Barrier

According to the literature method,<sup>1</sup> the appropriate racemic compound (1 mg) was dissolved in 2 mL HPLC grade *n*-hexane. The sample was subjected to semi-preparative normal-phase HPLC (100 µL injection volume) under the specified conditions using an analytical normal phase chiral column (dimensions: 0.46 cm ø x 25 cm) along with the corresponding guard column (0.4 cm ø x 1 cm). The slower eluting enantiomer was collected into a HPLC vial and the resulting solution was immediately analyzed by normal phase HPLC under identical conditions (100 µL injection volume). The enantiomeric ratio and time were recorded and taken as the reference for initial time and enantiomeric ratio. The same sample was then allowed to stand at room temperature (20 °C, 293 K) reinjecting (100 µL injection volumes) at regular intervals. The data obtained from these HPLC experiments is shown in the experimental methods section below.

A graph of ln(1/ee) was plotted against time (s) to yield the rate constant of racemisation ( $k_{rac}$ ) as the gradient. The half-life of racemisation ( $t_{1/2rac}$ ) was calculated according to equation (1) and the rate constant of enantiomerisation ( $k_{ent}$ ) was calculated according to equation (2). The barrier to racemisation was then calculated according to the Eyring equation (3), where  $R$  is the gas constant (8.314 J K<sup>-1</sup> mol<sup>-1</sup>);  $T$  is the temperature in Kelvin;  $k_B$  is the Boltzmann constant (1.381×10<sup>-23</sup> J K<sup>-1</sup>) and  $h$  is Planck's constant (6.626×10<sup>-34</sup> J s).

$$(1) \quad t_{1/2rac} = \frac{\ln(2)}{k_{rac}}$$

$$(2) \quad k_{ent} = \frac{k_{rac}}{2}$$

$$(3) \quad \Delta G^\ddagger = -RT \ln \left( \frac{k_{ent} h}{k_B T} \right)$$

### 3. Experimental Procedures

#### 3.1 Synthesis of Secondary Amide Starting Materials

##### N-(2-(*tert*-Butyl)phenyl)-3-phenylpropanamide, **1a**

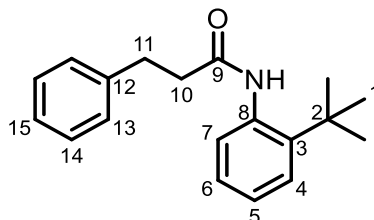

A stirred solution of hydrocinnamic acid (5.54 g, 36.9 mmol, 1.1 eq.) in  $\text{SOCl}_2$  (17 mL, 230 mmol, 7 eq.) was heated to reflux for 3 hours. The solution was allowed to cool and the  $\text{SOCl}_2$  was removed *in vacuo* to yield the acid chloride as a yellow oil. In a separate flask, 2-*tert*-butyl aniline (5.00 g, 33.5 mmol, 1 eq.) was dissolved in  $\text{CH}_2\text{Cl}_2$  (115 mL) and cooled to 0 °C. Triethylamine (5.1 mL, 36.7 mmol, 1.1 eq.) was added and the acid chloride was added to the stirred solution dropwise. The solution was warmed to room temperature and stirred for 16 h. The reaction was diluted with water, the layers separated and the aqueous layer extracted twice with  $\text{CH}_2\text{Cl}_2$ . The combined organics were dried over  $\text{MgSO}_4$ , filtered and concentrated *in vacuo*. The crude residue was purified by recrystallization (EtOAc/*n*-hexane) to afford compound **1a** as an off white solid (6.02 g, 64% yield). Spectral data is consistent with that reported previously.<sup>2</sup>

<sup>1</sup>H NMR (400 MHz,  $\text{CDCl}_3$ )  $\delta_{\text{H}}$  7.52 (d,  $J = 7.8$  Hz, 1H,  $\text{H}_{\text{Ar}}$ ), 7.41 – 7.04 (m, 9H,  $8\text{H}_{\text{Ar}}$  and N-H), 3.10 (t,  $J = 7.6$  Hz, 2H,  $\text{H}_{10}/\text{H}_{11}$ ), 2.71 (t,  $J = 7.6$  Hz, 2H,  $\text{H}_{10}/\text{H}_{11}$ ), 1.32 (s, 9H,  $\text{H}_1$ ).

<sup>13</sup>C NMR (101 MHz,  $\text{CDCl}_3$ )  $\delta_{\text{C}}$  170.5, 142.8, 140.8, 135.1, 128.7, 128.6, 128.2, 126.9, 126.7, 126.5, 126.3, 39.7, 34.6, 31.6, 30.8.

##### N-(2-(*tert*-Butyl)phenyl)propionamide, **1b**

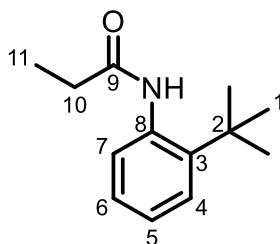

To a stirred solution of 2-*tert*-butylaniline (1.00 g, 6.70 mmol, 1 eq.) in  $\text{CH}_2\text{Cl}_2$  (22 mL), was added triethylamine (1.0 mL, 7.2 mmol, 1.1 eq.). The mixture was cooled to 0 °C and propionyl chloride (0.64 mL, 7.3 mmol, 1.1 eq.) was added dropwise. The mixture was warmed to room temperature and stirred for 1 h. Water was then added, the layers separated, and aqueous layer extracted twice with  $\text{CH}_2\text{Cl}_2$ . The combined organic extracts were washed with brine, dried over  $\text{MgSO}_4$ , filtered, and concentrated under reduced pressure. The crude product was purified by recrystallization (EtOAc/ petrol 40-60) to afford compound **1b** as a white solid (995 mg, 72% yield).

Spectral data is consistent with that previously reported.<sup>3</sup>

**<sup>1</sup>H NMR (300 MHz, CDCl<sub>3</sub>)** δ<sub>H</sub> 7.59 (d, *J* = 7.7 Hz, 1H, H<sub>Ar</sub>), 7.41 (d, *J* = 7.6 Hz, 1H, H<sub>Ar</sub>), 7.33 – 7.09 (m, 3H, 2H<sub>Ar</sub> and N-H), 2.46 (q, *J* = 7.5 Hz, 2H, H<sub>10</sub>), 1.43 (s, 9H, H<sub>1</sub>), 1.31 (t, *J* = 7.6 Hz, 3H, H<sub>11</sub>).

**<sup>13</sup>C NMR (75 MHz, CDCl<sub>3</sub>)** δ<sub>C</sub> 171.9, 142.5, 135.2, 128.1, 126.8, 126.5, 126.1, 34.6, 30.8, 30.7, 9.8.

### N-(2-(*tert*-Butyl)phenyl)octanamide, **1c**

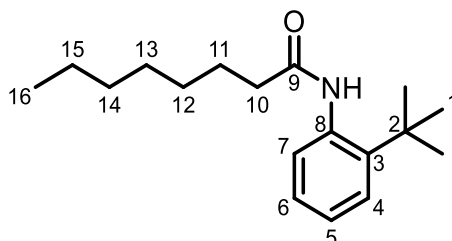

To a stirred solution of 2-*tert*-butyl aniline (250 mg, 1.68 mmol, 1 eq.) in CH<sub>2</sub>Cl<sub>2</sub> (5.5 mL) was added triethylamine (0.26 mL, 1.8 mmol, 1.1 eq.). The mixture was cooled to 0 °C and octanoyl chloride (0.31 mL, 1.8 mmol, 1.1 eq.) was added dropwise. The reaction was warmed to room temperature and allowed to stir for 2 hours. The reaction was diluted with water, the layers separated, and the aqueous layer extracted twice with CH<sub>2</sub>Cl<sub>2</sub>. The combined organics were dried over MgSO<sub>4</sub>, filtered, and concentrated *in vacuo*. The crude residue was purified by column chromatography (25% Et<sub>2</sub>O/ petrol 40-60) to afford **1c** as a white solid (290 mg, 63% yield).

**<sup>1</sup>H NMR (400 MHz, CDCl<sub>3</sub>)** δ 7.59 (d, *J* = 7.9 Hz, 1H, H<sub>4</sub>), 7.39 (d, *J* = 7.9 Hz, 1H, H<sub>7</sub>), 7.26 – 7.11 (m, 3H, H<sub>5</sub> and H<sub>6</sub> and N-H), 2.39 (t, *J* = 7.6 Hz, 2H, H<sub>10</sub>), 1.75 (qn, *J* = 7.7 Hz, 2H, H<sub>11</sub>), 1.50 – 1.18 (m, 17H, H<sub>1</sub>, H<sub>12</sub>, H<sub>13</sub>, H<sub>14</sub>, H<sub>15</sub>), 0.88 (t, *J* = 5.9 Hz, 3H, H<sub>16</sub>).

**<sup>13</sup>C NMR (75 MHz, CDCl<sub>3</sub>)** δ<sub>C</sub> 171.5, 142.5, 135.4, 128.1, 127.0, 126.6, 126.2, 38.0, 34.7, 31.8, 30.9, 29.5, 29.2, 25.8, 22.7, 14.2.

**HRMS (ESI<sup>+</sup>):** *m/z* calcd. for C<sub>18</sub>H<sub>30</sub>NO<sup>+</sup> [M+H]<sup>+</sup> 276.2322; found 276.2308, Δ 5.1 ppm.

**FTIR (neat) v/cm<sup>-1</sup>:** 3262, 2958, 2915, 2849, 1649, 1517, 1286, 1182, 1052, 756, 698, 561.

**Melting point (°C):** 82-84.

### N-(2-(*tert*-Butyl)phenyl)cyclopropanecarboxamide, **1d**

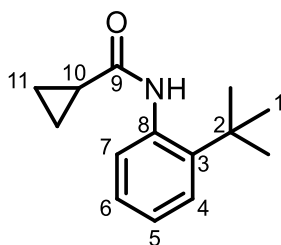

A stirred solution of 2-*tert*-butylaniline (1.00 g, 6.70 mmol, 1 eq.) and triethylamine (1.0 mL, 7.4 mmol, 1.1 eq.) in CH<sub>2</sub>Cl<sub>2</sub> (22 mL) was cooled to 0 °C. Cyclopropane carbonyl chloride (0.66 mL, 7.4 mmol, 1.1 eq.) was added dropwise and the mixture was stirred at room temperature for 16 hours. The reaction was diluted with water, the layers separated and the aqueous layer was extracted twice with CH<sub>2</sub>Cl<sub>2</sub>. The combined organics were dried

over  $\text{MgSO}_4$ , filtered, and concentrated *in vacuo*. The crude residue was recrystallised (EtOAc/*n*-Hexane) to afford **1d** as white crystals (1.22 g, 84 % yield).

$^1\text{H NMR}$  (400 MHz,  $\text{CDCl}_3$ )  $\delta_{\text{H}}$  7.67 – 7.33 (m, 2H,  $2\text{H}_{\text{Ar}}$ ), 7.27 – 7.11 (m, 3H,  $2\text{H}_{\text{Ar}}$  and N-H), 1.61 – 1.34 (m, 10H,  $\text{H}_1, \text{H}_{10}$ ), 1.14 – 0.57 (m, 4H,  $\text{H}_{11}$ ).

$^{13}\text{C NMR}$  (75 MHz,  $\text{CDCl}_3$ )  $\delta_{\text{C}}$  171.9, 142.4, 135.6, 128.1, 126.9, 126.6, 126.0, 30.8, 15.9, 8.7, 7.6.

HRMS (ESI<sup>+</sup>):  $m/z$  calc'd for  $\text{C}_{14}\text{H}_{20}\text{NO}^+$   $[\text{M}+\text{H}]^+$  218.1539; found 218.1554,  $\Delta$  6.9 ppm.

FTIR (neat)  $\nu/\text{cm}^{-1}$  = 3242, 3004, 2957, 1650, 1524, 1199, 755.

Melting point ( $^{\circ}\text{C}$ ) 151-154.

### N-(2-(*tert*-Butyl)phenyl)cyclobutanecarboxamide, **1e**

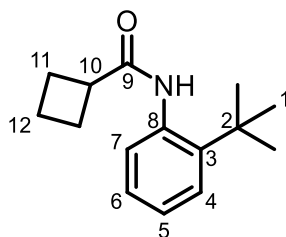

2-*tert*-butylaniline (1.00 g, 6.70 mmol, 1.0 eq.) and cyclobutanecarboxylic acid (1.0 mL, 10 mmol, 1.5 eq.) were dissolved in  $\text{CH}_2\text{Cl}_2$  (7 mL). The stirred solution was cooled to  $0^{\circ}\text{C}$  and *N*-(3-dimethylaminopropyl)-*N'*-ethylcarbodiimide hydrochloride (1.94 g, 10.1 mmol, 1.5 eq.) was charged portion wise. The mixture was warmed to room temperature and stirred for 16 h. The reaction was then poured into water, the layers separated, and the aqueous layer extracted twice with  $\text{CH}_2\text{Cl}_2$ . The combined organics were sequentially washed with  $\text{NaHCO}_3$ , 1M HCl and brine. The combined organic layer was dried over  $\text{MgSO}_4$ , filtered, and concentrated *in vacuo*. The crude residue was recrystallised (EtOAc/*n*-hexane) to yield **1e** as a white solid (850 mg, 55% yield).

$^1\text{H NMR}$  (300 MHz,  $\text{CDCl}_3$ )  $\delta_{\text{H}}$  7.65 (d,  $J$  = 7.8 Hz, 1H,  $\text{H}_{\text{Ar}}$ ), 7.37 (d,  $J$  = 7.6 Hz, 1H,  $\text{H}_{\text{Ar}}$ ), 7.25 – 6.87 (m, 3H,  $2\text{H}_{\text{Ar}}$  and N-H), 3.21 (qn,  $J$  = 8.6 Hz, 1H,  $\text{H}_{10}$ ), 2.51 – 2.17 (m, 4H,  $\text{H}_{11}$ ), 2.13 – 1.83 (m, 2H,  $\text{H}_{12}$ ), 1.40 (s, 9H,  $\text{H}_1$ ).

$^{13}\text{C NMR}$  (75 MHz,  $\text{CDCl}_3$ )  $\delta_{\text{C}}$  173.0, 142.1, 135.5, 127.5, 126.9, 126.6, 125.9, 41.0, 34.7, 30.8, 25.4, 18.2.

HRMS (ESI<sup>+</sup>):  $m/z$  calc'd for  $\text{C}_{15}\text{H}_{21}\text{NNaO}^+$   $[\text{M}+\text{Na}]^+$  254.1515; found 254.1494,  $\Delta$  8.3 ppm.

FTIR (neat)  $\nu/\text{cm}^{-1}$  = 3244, 2998, 2966, 2865, 1640, 1515, 1250, 1228, 746, 671, 488.

Melting point ( $^{\circ}\text{C}$ ): 138-140.

### N-(2-(*tert*-Butyl)phenyl)cyclopentanecarboxamide, **1f**

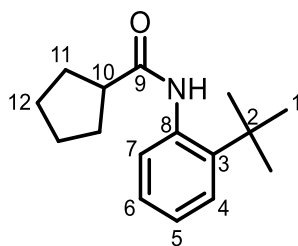

A stirred solution of 2-*tert*-butylaniline (1.00 g, 6.70 mmol, 1 eq.) and triethylamine (1.0 mL, 7.4 mmol, 1.1 eq.) in CH<sub>2</sub>Cl<sub>2</sub> (22 mL) was cooled to 0 °C. Cyclopentanecarbonyl chloride (0.90 mL, 7.4 mmol, 1.1 eq.) was added dropwise and the mixture was warmed to room temperature and stirred for 16 h. The reaction was diluted with water, the layers separated and the aqueous layer was extracted twice with CH<sub>2</sub>Cl<sub>2</sub>. The combined organics were dried over MgSO<sub>4</sub>, filtered, and concentrated *in vacuo*. The crude residue was recrystallised (EtOAc/*n*-hexane) to afford **1f** as a white solid (826 mg, 50 % yield).

**<sup>1</sup>H NMR (300 MHz, CDCl<sub>3</sub>)** δ<sub>H</sub> 7.64 (d, *J* = 7.8 Hz, 1H, H<sub>Ar</sub>), 7.38 (dd, *J* = 7.8, 1.7 Hz, 1H, H<sub>Ar</sub>), 7.29 – 7.08 (m, 3H, 2H<sub>Ar</sub> and N-H), 2.73 (qn, *J* = 8.1 Hz, 1H, H<sub>10</sub>), 2.13 – 1.55 (m, 8H, H<sub>11</sub> and H<sub>12</sub>), 1.41 (s, 9H, H<sub>1</sub>).

**<sup>13</sup>C NMR (75 MHz, CDCl<sub>3</sub>)** δ 174.3, 142.1, 135.6, 127.7, 126.9, 126.6, 125.9, 47.2, 34.7, 30.8, 30.4, 26.0.

**HRMS (ESI<sup>+</sup>):** *m/z* calc'd for C<sub>16</sub>H<sub>23</sub>NNaO<sup>+</sup> [M+Na]<sup>+</sup> 268.1672; found 268.1651, Δ 7.8 ppm.

**FTIR (neat) ν/cm<sup>-1</sup>:** 3242, 2953, 2866, 1648, 1520, 756, 706.

**Melting point(°C):** 148-149.

### N-(2-(*tert*-Butyl)phenyl)cyclohexanecarboxamide, **1g**

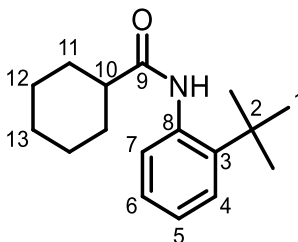

2-*tert*-Butyl aniline (1.00 g, 6.70 mmol, 1 eq.) and cyclohexanecarboxylic acid (1.3 mL, 10 mmol, 1.5 eq.) were dissolved in CH<sub>2</sub>Cl<sub>2</sub> (6.7 mL). The stirred solution was cooled to 0 °C and *N*-(3-dimethylaminopropyl)-*N'*-ethylcarbodiimide hydrochloride (1.94 g, 10.1 mmol, 1.5 eq.) was charged portion wise. The mixture was warmed to room temperature and stirred for 16 h. The reaction was then poured into water, the layers separated, and the aqueous layer extracted twice with CH<sub>2</sub>Cl<sub>2</sub>. The combined organics were washed sequentially with NaHCO<sub>3</sub>, 1M HCl and brine. The combined organics were dried over MgSO<sub>4</sub>, filtered, and concentrated *in vacuo*. The crude residue was recrystallised (EtOAc/*n*-hexane) to yield **1g** as white crystals (442 mg, 25 % yield). Spectral data is consistent with that reported previously.<sup>2</sup>

**<sup>1</sup>H NMR (400 MHz, CDCl<sub>3</sub>)** δ<sub>H</sub> 7.62 (d, *J* = 7.8 Hz, 1H, H<sub>Ar</sub>), 7.40 (d, *J* = 7.7 Hz, 1H, H<sub>Ar</sub>), 7.29 – 7.12 (m, 3H, 2H<sub>Ar</sub> and N-H), 2.31 (tt, *J* = 11.9, 3.3 Hz, 1H, H<sub>10</sub>), 2.11 – 1.20 (m, 10H, H<sub>11</sub>, H<sub>12</sub> and H<sub>13</sub>) 1.44 (s, 9H, H<sub>1</sub>).

**<sup>13</sup>C NMR (75 MHz, CDCl<sub>3</sub>)** δ<sub>C</sub> 174.2, 142.5, 135.5, 128.0, 126.9, 126.6, 126.0, 46.7, 34.7, 30.8, 29.8, 25.9, 25.9.

### N-(2-isopropylphenyl)-3-phenylpropanamide, **1h**

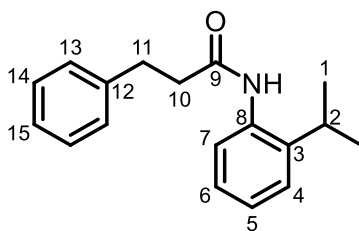

A stirred solution of 2-isopropylaniline (450 mg, 3.33 mmol, 1 eq.) and triethylamine (0.51 mL, 3.7 mmol, 1.1 eq.) in CH<sub>2</sub>Cl<sub>2</sub> (11.3 mL) was cooled to 0 °C. Freshly prepared hydrocinnamoyl chloride (0.55 mL, 3.7 mmol, 1.1 eq.) was added dropwise and the mixture was warmed to room temperature and stirred for 16 hours. After this time, the reaction was diluted with H<sub>2</sub>O and CH<sub>2</sub>Cl<sub>2</sub>, the layers separated, and the aqueous layer was extracted with CH<sub>2</sub>Cl<sub>2</sub> twice. The combined organics were dried over MgSO<sub>4</sub>, filtered, and concentrated *in vacuo*. The crude residue was purified by column chromatography (50% Et<sub>2</sub>O/ petrol 40-60) to yield **1h** as an off-white solid (739 mg, 83% yield).

<sup>1</sup>H NMR (400 MHz, CDCl<sub>3</sub>) δ<sub>H</sub> 7.61 – 7.53 (m, 1H, H<sub>7</sub>), 7.36 – 7.12 (m, 8H, H<sub>Ar</sub>), 6.91 (s, 1H, N-H), 3.08 (t, J = 7.4 Hz, 2H, H<sub>11</sub>), 2.78 – 2.64 (m, 3H, H<sub>2</sub> + H<sub>10</sub>), 1.13 (d, J = 6.9 Hz, 6H, H<sub>1</sub>).

Diagnostic signals for the minor amide isomer were observed at; 2.99-2.89 (m, H<sub>11</sub>) 2.43-2.35 (m, H<sub>10</sub>),

<sup>13</sup>C NMR (101 MHz, CDCl<sub>3</sub>) δ<sub>C</sub> 170.9, 140.9, 140.7, 133.9, 128.8, 128.5, 126.5, 126.4, 126.3, 125.7, 125.2, 39.3, 31.8, 27.8, 23.2.

HRMS (ESI+): m/z calc'd for C<sub>18</sub>H<sub>21</sub>NONa<sup>+</sup> [M+Na]<sup>+</sup> 290.1515; found 290.1526, Δ 3.8 ppm.

IR (cm<sup>-1</sup>): 3250, 2963, 1641, 1525, 753, 698

m.p (°C): 87-89

### N-(2-Fluoro-6-methylphenyl)-3-phenylpropanamide, **1i**

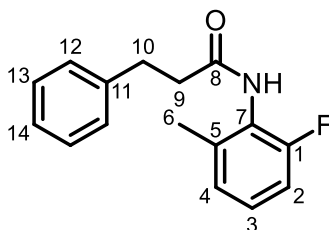

A stirred solution of 2-fluoro-6-methylaniline (416 mg, 3.33 mmol, 1 eq.) and triethylamine (0.51 mL, 3.7 mmol, 1.1 eq.) in CH<sub>2</sub>Cl<sub>2</sub> (11.3 mL) was cooled to 0 °C. Freshly prepared hydrocinnamoyl chloride (0.55 mL, 3.7 mmol, 1.1 eq.) was added dropwise and the mixture was warmed to room temperature and stirred for 16 hours. After this time, the reaction was diluted with H<sub>2</sub>O and CH<sub>2</sub>Cl<sub>2</sub>, the layers separated, and the aqueous layer was extracted with CH<sub>2</sub>Cl<sub>2</sub> twice. The combined organics were dried over MgSO<sub>4</sub>, filtered, and concentrated *in vacuo*. The crude residue was purified by column chromatography (50% Et<sub>2</sub>O/petrol 40-60) to yield **1i** as an off-white solid (643 mg, 75% yield).

<sup>1</sup>H NMR (400 MHz, CDCl<sub>3</sub>) δ<sub>H</sub> 7.35 – 7.18 (m, 5H, H<sub>12</sub> + H<sub>13</sub> + H<sub>14</sub>), 7.15 – 7.05 (m, 1H, H<sub>3</sub>), 7.00 – 6.87 (m, 2H, H<sub>2</sub> + H<sub>4</sub>), 6.81 (s, 1H, N-H), 3.06 (t, J = 7.6 Hz, 2H, H<sub>10</sub>), 2.72 (t, J = 7.6 Hz, 2H, H<sub>9</sub>), 2.11 (s, 3H, H<sub>6</sub>).



Diagnostic signals for the minor amide isomer were observed at; 2.93 (s, H<sub>9</sub>/H<sub>10</sub>), 2.15 (s, H<sub>6</sub>).

<sup>13</sup>C NMR (101 MHz, CDCl<sub>3</sub>) δ 171.0, 157.7 (d, J = 246.9 Hz), 140.7, 138.0, 128.7, 128.5, 127.9 (d, J = 8.9 Hz), 126.5, 125.9 (d, J = 3.4 Hz), 123.2 (d, J = 13.1 Hz), 113.2 (d, J = 20.5 Hz), 38.3, 31.8, 18.1.

<sup>19</sup>F NMR (376 MHz, CDCl<sub>3</sub>) δ<sub>F</sub> -121.94 (dd, J = 9.6, 5.5 Hz).

A diagnostic signal for the minor amide isomer was observed at; -120.29 (s)

HRMS (ESI<sup>+</sup>): m/z calc'd for C<sub>16</sub>H<sub>17</sub>FNO<sup>+</sup> [M+H]<sup>+</sup> 258.1289; found 258.1291, Δ 0.8 ppm.

IR (cm<sup>-1</sup>): 3243, 3029, 1657, 1525, 1275, 774

m.p (°C): 117-119

### N-(2-Chloro-4,6-dimethylphenyl)-3-phenylpropanamide, **1j**

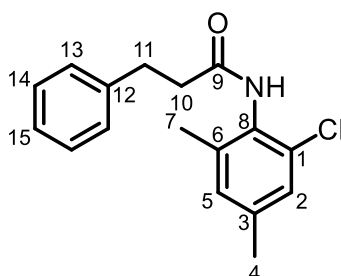

A stirred solution of hydrocinnamic acid (849 mg, 5.65 mmol, 1.1 eq.) in SOCl<sub>2</sub> (2.6 mL, 36 mmol, 7 eq.) was heated to reflux for 3 hours. The solution was allowed to cool and the SOCl<sub>2</sub> was removed *in vacuo* to yield the acid chloride as a yellow oil. In a separate flask, 2-chloro-4,6-dimethylaniline (800 mg, 5.14 mmol, 1 eq.) was dissolved in CH<sub>2</sub>Cl<sub>2</sub> (18 mL) and cooled to 0 °C. Triethylamine (0.79 mL, 5.7 mmol, 1.1 eq.) was added and the acid chloride was added to the stirred solution dropwise. The solution was warmed to room temperature and stirred for 16 h. The reaction was diluted with water, the layers separated and the aqueous layer extracted twice with CH<sub>2</sub>Cl<sub>2</sub>. The combined organics were dried over MgSO<sub>4</sub>, filtered and concentrated *in vacuo*. The crude residue was purified by column chromatography (40% Et<sub>2</sub>O/ petrol 40-60) to yield **1j** as an off white solid (677 mg, 46% yield).

<sup>1</sup>H NMR (400 MHz, CDCl<sub>3</sub>) δ<sub>H</sub> 7.33 – 7.19 (m, 5H, H<sub>Ar</sub>), 7.06 – 7.04 (m, 1H, H<sub>2</sub>), 6.93 – 6.91 (m, 1H, H<sub>5</sub>), 6.86 (br, 1H, N-H), 3.08 (t, J = 7.7 Hz, 2H, H<sub>10</sub>), 2.76 – 2.70 (m, 2H, H<sub>11</sub>), 2.26 (s, 3H, H<sub>4</sub>), 2.11 (s, 3H, H<sub>7</sub>).

Diagnostic signals for the minor amide isomer were observed at; 7.14 – 7.08 (m, H<sub>Ar</sub>), 6.95 (s, H<sub>2</sub>/H<sub>5</sub>) 6.60 (br s, N-H), 2.99 – 2.86 (m, H<sub>10</sub>/H<sub>11</sub>), 2.29 (s, H<sub>4</sub>/H<sub>7</sub>).

<sup>13</sup>C NMR (75 MHz, CDCl<sub>3</sub>) δ<sub>C</sub> 170.9, 140.7, 138.2, 137.8, 131.1, 130.1, 129.9, 128.7, 128.6, 127.5, 126.4, 38.3, 31.7, 20.9, 18.9.

HRMS (ESI<sup>+</sup>) m/z calcd. For C<sub>17</sub>H<sub>19</sub>ClNO<sup>+</sup> [M+H]<sup>+</sup> 288.1150; found 288.1134, Δ 5.6 ppm.

FTIR (neat) ν/cm<sup>-1</sup>: 3239, 3025, 2928, 1660, 1518, 971, 848, 696, 485.

Melting point (°C): 164-166.

### N-(2-Bromo-4,6-dimethylphenyl)-3-phenylpropanamide, **1k**

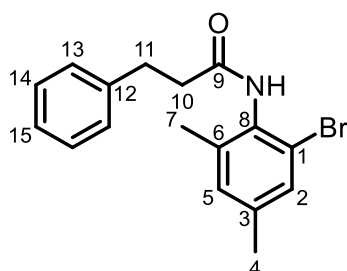

A stirred solution of 2-bromo-4,6-dimethylaniline (666 mg, 3.33 mmol, 1 eq.) and triethylamine (0.51 mL, 3.7 mmol, 1.1 eq.) in  $\text{CH}_2\text{Cl}_2$  (11.3 mL) was cooled to 0 °C. Hydrocinnamoyl chloride (0.55 mL, 3.7 mmol, 1.1 eq.) was added dropwise and the mixture was warmed to room temperature and stirred for 16 hours. After this time, the reaction was diluted with  $\text{H}_2\text{O}$  and  $\text{CH}_2\text{Cl}_2$ , the layers separated, and the aqueous layer was extracted with  $\text{CH}_2\text{Cl}_2$  twice. The combined organics were dried over  $\text{MgSO}_4$ , filtered, and concentrated *in vacuo*. The crude residue was purified by column chromatography (1:1  $\text{Et}_2\text{O}$ /petrol 40-60) to yield **1k** as an off-white solid (297 mg, 27% yield).

**$^1\text{H}$  NMR (400 MHz,  $\text{CDCl}_3$ )**  $\delta_{\text{H}}$  7.38 – 7.17 (m, 6H,  $\text{H}_{\text{Ar}}$ ), 6.99 – 6.95 (m, 1H,  $\text{H}_5$ ), 6.84 (s, 1H, N-H), 3.09 (t,  $J = 7.7$  Hz, 2H,  $\text{H}_{11}$ ), 2.80 – 2.69 (m, 2H,  $\text{H}_{10}$ ), 2.27 (s, 3H,  $\text{H}_4$ ), 2.14 (s, 3H,  $\text{H}_7$ ).

Diagnostic signals for the minor amide isomer were observed at; 7.14 – 7.08 (m,  $\text{H}_{\text{Ar}}$ ), 7.00 (s,  $\text{H}_5$ ), 6.62 (s, N-H).

**$^{13}\text{C}$  NMR (101 MHz,  $\text{CDCl}_3$ )**  $\delta_{\text{C}}$  170.7, 140.7, 138.7, 137.9, 131.3, 130.9, 130.7, 128.7, 128.6, 126.5, 121.9, 38.4, 31.7, 20.8, 19.2.

**HRMS (ESI+):**  $m/z$  calc'd for  $\text{C}_{17}\text{H}_{18}\text{NOBrNa}^+$  [ $\text{M}+\text{Na}$ ] $^+$  354.0464; found 354.0464,  $\Delta$  0.1 ppm.

**IR ( $\text{cm}^{-1}$ ):** 3243, 3060, 1657, 1519, 1234, 697

**m.p ( $^{\circ}\text{C}$ ):** 157-160

### N-(2-(*tert*-Butyl)phenyl)benzamide, **1l**

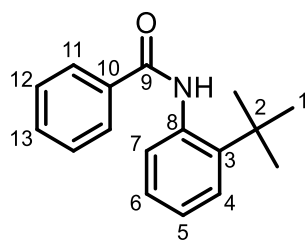

A stirred solution of 2-*tert*-butylaniline (0.957 g, 6.41 mmol, 1 eq.) in EtOAc (6.4 mL) was cooled to 0 °C. Benzoyl chloride (0.74 mL, 6.4 mmol, 1 eq.) was added dropwise followed by the dropwise addition of a saturated solution of aqueous  $\text{Na}_2\text{CO}_3$  (3.2 mL). The reaction mixture was warmed to room temperature and stirred for 2 hours and then the reaction mixture was diluted with water and extracted three times with EtOAc. The combined organics were dried over  $\text{MgSO}_4$ , filtered, and concentrated *in vacuo*. The crude solid was recrystallised (EtOAc/petrol 40-60) affording the title compound **1l** as a white solid (1.14 g, 70%). Spectral data is consistent with that previously reported.<sup>4</sup>

**<sup>1</sup>H NMR (300 MHz, CDCl<sub>3</sub>):** δ<sub>H</sub> 7.96 – 7.88 (m, 3H, 2H<sub>Ar</sub> + N-H), 7.74 (d, *J* = 7.8 Hz, 1H, H<sub>Ar</sub>), 7.62 – 7.47 (m, 3H, 3H<sub>Ar</sub>), 7.45 (dd, *J* = 7.8, 1.7 Hz, 1H, H<sub>Ar</sub>), 7.34 – 7.16 (m, 2H, H<sub>Ar</sub>), 1.46 (s, 9H, H<sub>1</sub>).

**<sup>13</sup>C NMR (75 MHz, CDCl<sub>3</sub>):** δ<sub>C</sub> 165.8, 142.8, 135.4, 135.1, 132.0, 129.0, 128.0, 127.1, 127.1, 126.8, 126.4, 34.8, 30.9.

#### N-(2-(*tert*-Butyl)phenyl)-4-trifluoromethylbenzamide, **1m**

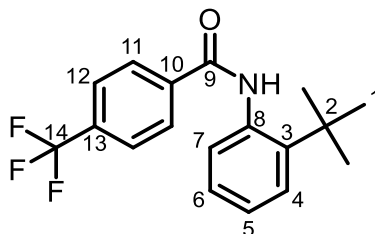

*para*-Trifluoromethylbenzoic acid (1.40 g, 7.37 mmol, 1.1 eq.) was suspended in SOCl<sub>2</sub> (3.8 mL, 52 mmol, 7.0 eq.) and heated to reflux for 3 hours, with stirring. The solution was allowed to cool and the SOCl<sub>2</sub> was removed *in vacuo* to yield the acid chloride as a yellow oil. In a separate flask, 2-*tert*-butylaniline (1.00 g, 6.70 mmol, 1.0 eq.) was dissolved in CH<sub>2</sub>Cl<sub>2</sub> (25 mL) and cooled to 0 °C. Triethylamine (1.0 mL, 7.4 mmol, 1.1 eq.) was added and the acid chloride was added to the stirred solution dropwise. The reaction was warmed to room temperature and stirred for 16 h. The reaction was diluted with water, the layers separated and the aqueous layer extracted twice with CH<sub>2</sub>Cl<sub>2</sub>. The combined organics were dried over MgSO<sub>4</sub>, filtered and concentrated *in vacuo*. The crude residue was purified by column chromatography (10% EtOAc/ petrol 40-60) to yield **1m** as an off white solid (403 mg, 19% yield).

**<sup>1</sup>H NMR (300 MHz, CDCl<sub>3</sub>)** δ<sub>H</sub> 8.02 (d, *J* = 8.1 Hz, 2H, 2H<sub>Ar</sub>), 7.90 (s, 1H, N-H), 7.79 (d, *J* = 8.2 Hz, 2H, 2H<sub>Ar</sub>), 7.76 – 7.66 (m, 1H H<sub>Ar</sub>), 7.46 (dd, *J* = 7.8, 1.8 Hz, 1H, H<sub>Ar</sub>), 7.34 – 7.27 (m, 1H, H<sub>Ar</sub>), 7.28 – 7.17 (m, 1H, H<sub>Ar</sub>), 1.45 (s, 9H, H<sub>1</sub>).

**<sup>13</sup>C NMR (176 MHz, CDCl<sub>3</sub>)** δ<sub>C</sub> 164.5, 142.8, 138.4, 135.0, 133.7 (q, *J* = 33.6 Hz), 130.7, 128.0, 127.6, 127.2, 126.9 (q, *J* = 16.1 Hz), 126.2, 123.8 (q, *J* = 272.4 Hz), 34.8, 31.0.

**<sup>19</sup>F NMR (282 MHz, CDCl<sub>3</sub>)** δ<sub>F</sub> – 63.0.

**HRMS (ESI<sup>+</sup>):** *m/z* calc'd for C<sub>18</sub>H<sub>18</sub>F<sub>3</sub>NNaO<sup>+</sup>[M+Na]<sup>+</sup> 344.1233; found 344.1211, Δ -6.4.

**FTIR (neat) v/cm<sup>-1</sup>** = 3252, 2992, 2965, 1649, 1529, 1316, 1125, 758.

**Melting point (°C)** 252-254.

#### N-(2-(*tert*-Butyl)phenyl)-4-methoxybenzamide, **1n**

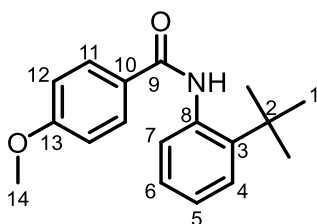

4-Methoxybenzoic acid (1.12 g, 7.37 mmol, 1.10 eq.) was dissolved in SOCl<sub>2</sub> (3.8 mL, 52 mmol, 7.0 eq.) and heated to reflux for 3 hours, with stirring. After this time, the mixture was allowed to cool and the SOCl<sub>2</sub> was

removed *in vacuo* to yield the acid chloride as a yellow oil. A stirred solution of 2-*tert*-butylaniline (1.00 g, 6.70 mmol, 1.0 eq.) and triethylamine (1.0 mL, 7.4 mmol, 1.1 eq.) in CH<sub>2</sub>Cl<sub>2</sub> (25 mL) was cooled to 0 °C and the acid chloride was added dropwise. The solution was stirred at room temperature for 16 h. The reaction was diluted with water, the layers separated, and the aqueous layer extracted twice with CH<sub>2</sub>Cl<sub>2</sub>. The combined organics were dried over MgSO<sub>4</sub>, filtered, and concentrated *in vacuo*. The crude residue was purified by column chromatography (20% EtOAc/ petrol 40-60) to yield **1n** as a white solid (1.39 g, 73% yield).

Spectral data is consistent with that previously reported in the literature.<sup>5</sup>

**<sup>1</sup>H NMR (300 MHz, *d*<sub>6</sub>-DMSO)** δ<sub>H</sub> 9.66 (s, 1H, N-H), 7.99 (d, *J* = 8.3 Hz, 2H, H<sub>Ar</sub>), 7.50 – 7.41 (m, 1H, H<sub>Ar</sub>), 7.32 – 7.21 (m, 2H, H<sub>Ar</sub>), 7.14 – 6.99 (m, 3H, H<sub>Ar</sub>), 3.84 (s, 3H, H<sub>14</sub>), 1.34 (s, 9H, H<sub>1</sub>).

**<sup>13</sup>C NMR (75 MHz, *d*<sub>6</sub>-DMSO)** δ<sub>C</sub> 165.6, 161.8, 147.1, 136.4, 132.2, 129.4, 127.1, 126.8, 126.7, 126.4, 113.6, 55.4, 34.9, 30.9.

#### N-(2-(*tert*-Butyl)phenyl)cinnamamide, **1o**

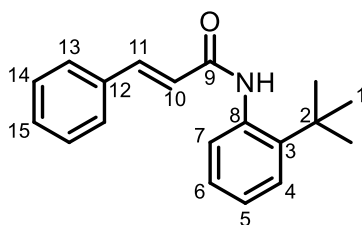

To a stirred solution of 2-*tert*-butylaniline (957 mg, 6.41 mmol, 1.00 eq.) in CH<sub>2</sub>Cl<sub>2</sub> (21 ml) was added triethylamine (1.0 ml, 7.1 mmol, 1.1 eq.). The solution was cooled to 0 °C and *trans*-cinnamoyl chloride (1.2 g, 7.1 mmol, 1.1 eq.) was added in small portions to the reaction. The reaction was stirred at room temperature for 16 h. The reaction was then diluted with water, the layers separated, and the aqueous layer was extracted twice with CH<sub>2</sub>Cl<sub>2</sub>. The combined organic layers were dried over MgSO<sub>4</sub>, filtered and concentrated *in vacuo*. The crude residue was purified by recrystallisation (EtOAc/ petrol 40-60) to afford **1o** as a white solid (1.29 g, 72 % yield).

Spectral data is consistent with that previously reported.<sup>2</sup>

**<sup>1</sup>H NMR (300 MHz, CDCl<sub>3</sub>)**: δ<sub>H</sub> 7.79 (d, *J* = 15.6 Hz, 1H, H<sub>11</sub>), 7.73 – 7.18 (m, 10H, H<sub>Ar</sub> and N-H), 6.61 (d, *J* = 15.6 Hz, 1H, H<sub>10</sub>), 1.47 (s, 9H, H<sub>1</sub>)

**<sup>13</sup>C NMR (75 MHz, CDCl<sub>3</sub>)**: δ<sub>C</sub> 164.3, 142.8, 142.4, 135.2, 134.7, 130.0, 128.9, 128.2, 128.0, 126.9, 126.7, 126.4, 121.0, 34.8, 30.8.

### 3.2 Synthesis of Chloroamides and Evaluation of Configurational Stability

#### *rac*-N-(2-(*tert*-Butyl)phenyl)-N-chloro-3-phenylpropanamide, **2a**

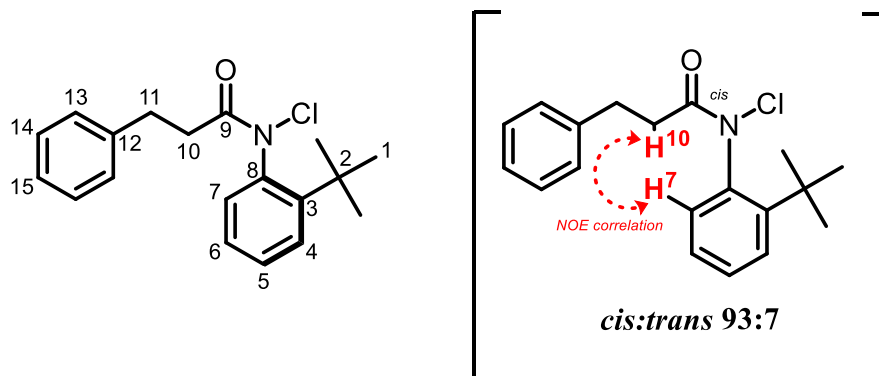

According to a modification of general procedure A, a stirred suspension of trichloroisocyanuric acid (1.82 g, 7.82 mmol, 1.1 eq.) in CH<sub>2</sub>Cl<sub>2</sub> (70 mL) was cooled to 0 °C and a solution of secondary amide **1a** (2.00 g, 7.11 mmol, 1.0 eq.) in CH<sub>2</sub>Cl<sub>2</sub> (30 mL) was added dropwise. Following the addition, the ice-bath was removed and the reaction was stirred for 30 mins at room temperature. The reaction was then diluted with water, the layers separated, and the aqueous layer extracted twice with CH<sub>2</sub>Cl<sub>2</sub>. The combined organics were dried over MgSO<sub>4</sub>, filtered, and concentrated *in vacuo*. The crude residue was purified via column chromatography (15% Et<sub>2</sub>O/petrol 40-60) afforded **2a** as an off white solid (2.14 g, 95% yield).

<sup>1</sup>H NMR (700 MHz, 298 K, CDCl<sub>3</sub>) δ<sub>H</sub> 7.50 (d, *J* = 8.1 Hz, 1H, H<sub>4</sub>), 7.35 (t, *J* = 7.7 Hz, 1H, H<sub>5</sub>), 7.26 – 7.16 (m, 4H, H<sub>14</sub>, H<sub>15</sub> and H<sub>6</sub>), 7.09 – 7.05 (m, 2H, H<sub>13</sub>), 6.90 (d, *J* = 7.8 Hz, 1H, H<sub>7</sub>), 3.07 – 2.88 (m, 2H, H<sub>11</sub>), 2.42 – 2.37 (m, 2H, H<sub>10</sub>), 1.40 (s, 9H).

<sup>13</sup>C NMR (176 MHz, 298 K, CDCl<sub>3</sub>) δ<sub>C</sub> 171.2, 148.2, 141.4, 140.5, 131.9, 130.6, 129.3, 128.7, 128.6, 128.0, 126.4, 37.5, 36.3, 31.9, 31.7.

<sup>1</sup>H NMR (700 MHz, 273 K, CDCl<sub>3</sub>) δ<sub>H</sub> δ 7.50 (dd, *J* = 8.1, 1.5 Hz, 1H, H<sub>4</sub>), 7.36 (ddd, *J* = 8.2, 7.3, 1.5 Hz, 1H, H<sub>5</sub>), 7.27 – 7.22 (m, 2H, H<sub>14</sub>), 7.21 – 7.16 (m, 2H, H<sub>15</sub> and H<sub>6</sub>), 7.07 (d, *J* = 7.1 Hz, 2H, H<sub>13</sub>), 6.88 (dd, *J* = 7.8, 1.5 Hz, 1H, H<sub>7</sub>), 3.01 (dt, *J* = 13.9, 7.9 Hz, 1H, H<sub>11</sub>), 2.91 (ddd, *J* = 14.2, 8.4, 6.7 Hz, 1H, H<sub>11</sub>'), 2.43 – 2.35 (m, 2H, H<sub>10</sub>), 1.39 (s, 9H, H<sub>1</sub>). Diagnostic signals for the minor *trans*-isomer were observed at; 7.48 – 7.44 (m, H<sub>4</sub>), 7.34 – 7.28 (m, H<sub>13</sub> and H<sub>Ar</sub>), 7.16 – 7.13 (m, H<sub>7</sub>), 3.16 – 3.08 (m, H<sub>10</sub>), 1.35 (s, H<sub>1</sub>). The identity of the major geometrical isomer was assigned as *cis*- on the basis of NOE correlations between H<sub>10</sub> and H<sub>7</sub> (see spectra). A ratio of 93:7 *cis/trans* was measured from <sup>1</sup>H NMR data collected at 233 K.

<sup>13</sup>C NMR (176 MHz, 273 K, CDCl<sub>3</sub>) δ<sub>C</sub> <sup>13</sup>C NMR (176 MHz, CDCl<sub>3</sub>) δ 176.0 (min.), 171.3 (maj.), 148.3 (min.), 148.0 (maj.), 142.6 (min.), 141.2 (maj.), 140.7 (min.), 140.4 (maj.), 131.8 (maj.), 131.6 (min.), 130.6 (maj.), 129.8 (min.), 129.3 (maj.), 128.7 (min.), 128.7 (maj.), 128.6 (maj.), 128.5 (min.), 128.2 (min.), 128.1 (maj.), 128.0 (min.), 126.4 (maj.), 126.4 (min.), 37.6 (maj.), 36.3 (min.), 36.2 (maj.), 35.7 (min.), 31.9 (maj.), 31.6 (maj.), 31.3 (min.), 30.9 (min.)

HRMS (ESI<sup>+</sup>): *m/z* calc'd for C<sub>19</sub>H<sub>23</sub>ClNO<sup>+</sup> [M+H]<sup>+</sup> 316.1463; found 316.1452, Δ -3.5 ppm.

FTIR (neat) *v*/cm<sup>-1</sup> = 3252, 2992, 2965, 1649, 1529, 1316, 1125, 758.

Melting point (°C) 63-64.

**Chiral HPLC:** Chiralpak-IC column. Solvent ratio = 90:10 *n*-hexane: *i*PrOH. Temperature = 25 °C. Flow rate = 1 ml/min,  $\lambda = 240$  nm,  $\tau_{ret} = 9.4$  min and 10.7 min.

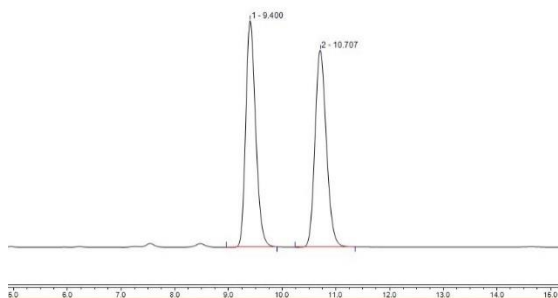

| Ret. Time<br>min | Amount<br>n.a. | Rel. Area<br>% | Area<br>mAU*min | Height<br>mAU |
|------------------|----------------|----------------|-----------------|---------------|
| 9.400            | n.a.           | 50.04          | 91.8826         | 430.11        |
| 10.707           | n.a.           | 49.96          | 91.7304         | 374.00        |

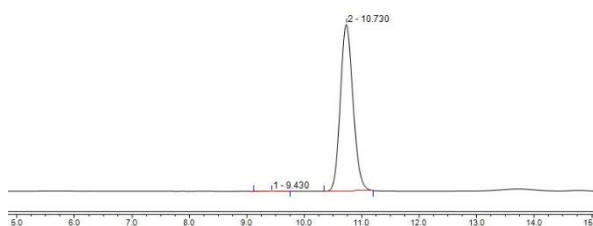

| Ret. Time<br>min | Amount<br>n.a. | Rel. Area<br>% | Area<br>mAU*min | Height<br>mAU |
|------------------|----------------|----------------|-----------------|---------------|
| 9.430            | n.a.           | 0.10           | 0.0605          | 0.29          |
| 10.730           | n.a.           | 99.90          | 58.4978         | 228.49        |

**Racemization study for 2a:** According to general procedure B, and using the conditions specified immediately above, an analytical quantity of the slower eluting enantiomer was collected by semipreparative HPLC and reinjected successively over time intervals, shown below, to calculate the rate of racemization.

| Time (s) | % maj. enantiomer | % min. enantiomer | ln(1/ee) |
|----------|-------------------|-------------------|----------|
| 0.00     | 99.90             | 0.10              | 0.00200  |
| 84240    | 97.27             | 2.73              | 0.0561   |
| 174480   | 94.47             | 5.53              | 0.117    |
| 261360   | 91.88             | 8.12              | 0.177    |
| 347160   | 89.56             | 10.44             | 0.234    |

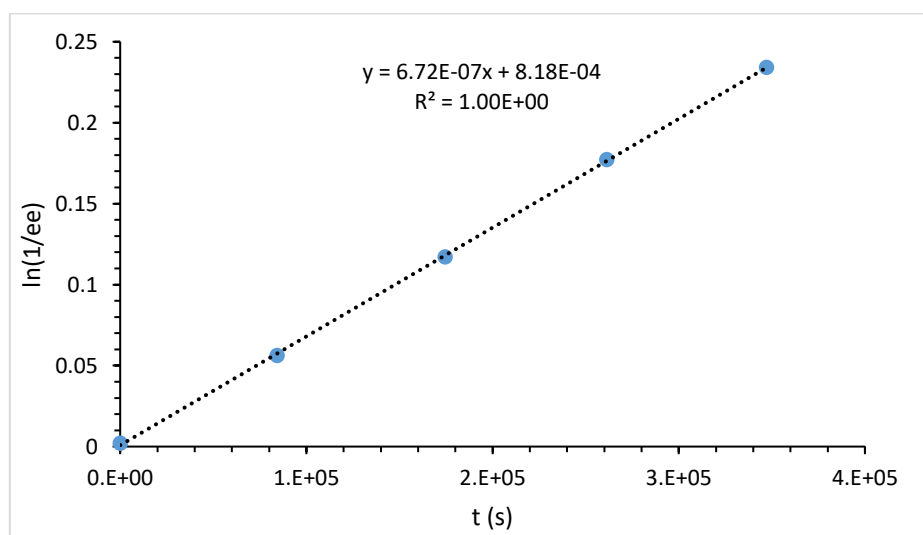

$$k_{rac} = 6.72 \times 10^{-7} \text{ s}^{-1}$$

$$t_{1rac} = 11.9 \text{ days}$$

$$\Delta G^\ddagger = 108.0 \text{ kJ/mol}$$

**rac-N-(2-(tert-Butyl)phenyl)-N-chloro-propionamide, 2b**

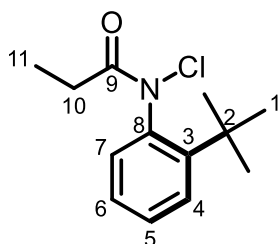

Synthesised from **1b** (110 mg, 0.536 mmol, 1.00 eq.), trichloroisocyanuric acid (137 mg, 0.589 mmol, 1.10 eq.) and CH<sub>2</sub>Cl<sub>2</sub> (4.8 mL) according to general procedure A. Column Chromatography (5% EtOAc/petrol 40-60) afforded **2b** as a yellow solid (117 mg, 91% yield).

**<sup>1</sup>H NMR (300 MHz, CDCl<sub>3</sub>, 298 K) δ<sub>H</sub>** <sup>1</sup>H NMR (300 MHz, CDCl<sub>3</sub>) δ 7.53 (d, *J* = 8.1 Hz, 1H, H<sub>4</sub>), 7.38 (t, *J* = 7.7 Hz, 1H, H<sub>5</sub>), 7.31 – 7.24 (m, 1H, H<sub>6</sub>), 7.17 (dd, *J* = 7.8, 1.6 Hz, 1H, H<sub>7</sub>), 2.22 – 2.01 (m, 2H, H<sub>10</sub>) 1.43 (s, 9H, H<sub>1</sub>), 1.17 – 1.06 (m, 3H, H<sub>11</sub>).

**<sup>13</sup>C NMR (126 MHz, CDCl<sub>3</sub>, CDCl<sub>3</sub>, 298 K) δ<sub>C</sub>** 172.9, 148.3, 141.7, 131.8, 130.5, 129.3, 128.0, 36.3, 31.7, 28.9, 9.8.

**<sup>1</sup>H NMR (500 MHz, CDCl<sub>3</sub>, 263 K) δ<sub>H</sub>** 7.53 (dd, *J* = 8.1, 1.5 Hz, 1H, H<sub>4</sub>), 7.48 – 7.36 (m, 1H, H<sub>5</sub>), 7.36 – 7.23 (m, 1H, H<sub>6</sub>), 7.18 (dd, *J* = 7.8, 1.6 Hz, 1H, H<sub>7</sub>), 2.11 (m, 2H, H<sub>10</sub> + H<sub>10'</sub>), 1.42 (s, 9H, H<sub>1</sub>), 1.09 (t, *J* = 7.4 Hz, 3H, H<sub>11</sub>).

Diagnostic peaks for the minor *trans* isomer were observed at 7.50 – 7.43 (m, H<sub>Ar</sub>), 7.35-7.31 (m, H<sub>Ar</sub>), 2.87 – 2.68 (m, H<sub>10</sub> + H<sub>10'</sub>), 1.36 (s, H<sub>1</sub>), 1.21 (t, *J* = 7.2 Hz, H<sub>11</sub>). A ratio of 88:12 *cis/trans* was measured from the <sup>1</sup>H NMR data collected at 263 K.

**<sup>13</sup>C NMR (126 MHz, CDCl<sub>3</sub>, 263 K) δ<sub>C</sub>** 177.7 (min.), 173.1 (maj.), 148.2 (min.), 147.9 (maj.), 142.8 (min.), 141.4 (maj.), 131.7 (maj.), 131.5 (min.), 130.6 (maj.), 129.7 (min.), 129.3 (maj.), 128.1 (min.), 128.1 (maj.), 128.0 (min.), 36.3 (maj.), 35.6 (min.), 31.6 (maj.), 31.2 (min.), 29.0 (maj.), 28.0 (min.), 9.9 (maj.), 9.2 (min.).

**FTIR (cm<sup>-1</sup>):** 3059, 2992, 2970, 2875, 1692, 1458.

**HRMS (ESI):** *m/z* calc'd for C<sub>13</sub>H<sub>19</sub>ClNO<sup>+</sup>[M+H]<sup>+</sup> 240.1150; found 240.1161, Δ 4.6 ppm.

**Melting point (°C):** 45-47.

**Chiral HPLC:** Chiralpak-IC column with guard; solvent ratio = 90:10 *n*-hexane: <sup>i</sup>PrOH. Temperature = 25 °C. Flow rate = 1 ml/min, λ = 240 nm, τ<sub>ret</sub> = 10.4 min and 11.7 min.

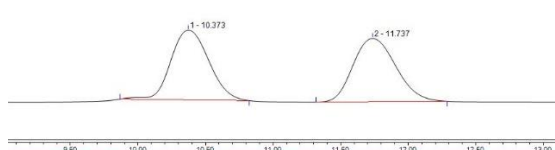

| Ret. Time<br>min | Amount<br>n.a. | Rel. Area<br>% | Area<br>mAU*min | Height<br>mAU |
|------------------|----------------|----------------|-----------------|---------------|
| 10.373           | n.a.           | 49.50          | 38.8659         | 119.42        |
| 11.737           | n.a.           | 50.50          | 39.6491         | 108.40        |

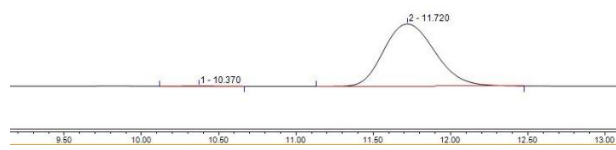

| Ret. Time<br>min | Amount<br>n.a. | Rel. Area<br>% | Area<br>mAU*min | Height<br>mAU |
|------------------|----------------|----------------|-----------------|---------------|
| 10.370           | n.a.           | 0.27           | 0.0986          | 0.35          |
| 11.720           | n.a.           | 99.73          | 35.7892         | 93.24         |

**Racemization study for 2b:** According to general procedure B, and using the conditions specified immediately above, an analytical quantity of the slower eluting enantiomer was collected by semipreparative HPLC and reinjected successively over time intervals shown below to calculate the rate of racemization.

| Time (s) | % maj. enantiomer | % min. enantiomer | ln(1/ee) |
|----------|-------------------|-------------------|----------|
| 0        | 99.73             | 0.27              | 0.00542  |
| 88260    | 97.30             | 2.70              | 0.0555   |
| 168820   | 94.50             | 5.50              | 0.117    |
| 256440   | 91.55             | 8.45              | 0.185    |

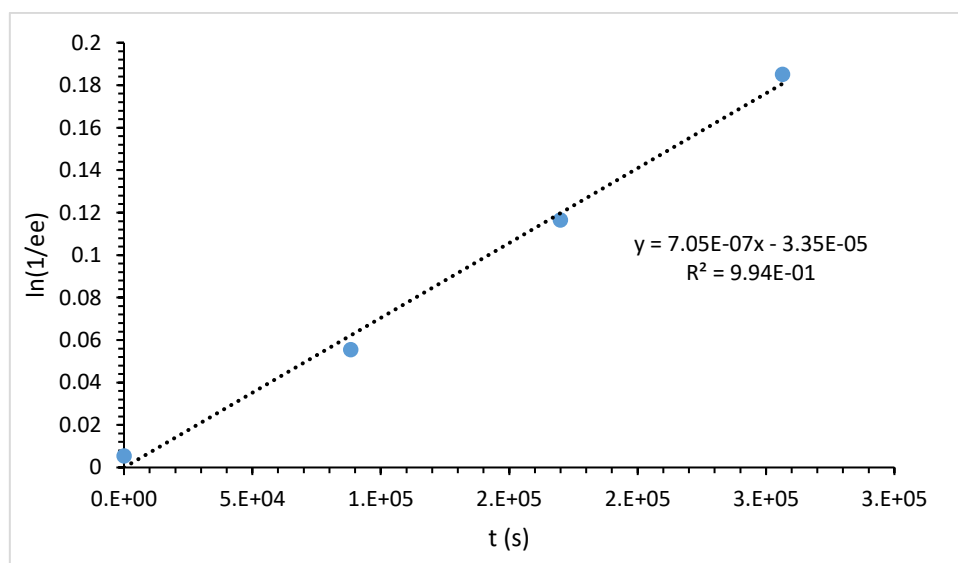

$$k_{rac} = 7.05 \times 10^{-7} \text{ s}^{-1}$$

$$t_{\frac{1}{2}rac} = 11.4 \text{ days}$$

$$\Delta G^\ddagger = 107.9 \text{ kJ/mol}$$



**rac-N-(2-(tert-Butyl)phenyl)-N-chloro-octanamide, 2c**

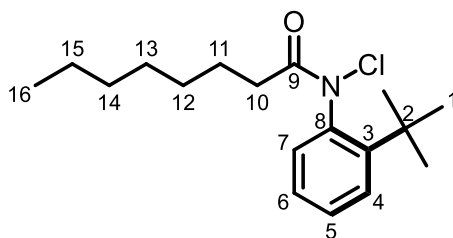

Synthesised from **1c** (250 mg, 0.908 mmol, 1.00 eq.), trichloroisocyanuric acid (232 mg, 1.00 mmol, 1.10 eq.) and  $\text{CH}_2\text{Cl}_2$  (8.3 mL) according to general procedure A. Column chromatography (10%  $\text{Et}_2\text{O}$ / petrol 40-60) afforded **2c** as a yellow oil (218 mg, 78% yield).

**$^1\text{H}$  NMR (400 MHz,  $\text{CDCl}_3$ )  $\delta$** : 7.53 (m, 1H, H<sub>4</sub>), 7.38 (m, 1H, H<sub>5</sub>), 7.27 (td,  $J$  = 7.5, 1.6 Hz, 1H, H<sub>6</sub>), 7.16 (dd,  $J$  = 7.8, 1.6 Hz, 1H, H<sub>7</sub>), 2.08 (br s, 2H, H<sub>10</sub>), 1.69 – 1.56 (m, 2H, H<sub>11</sub>), 1.44 (s, 9H, H<sub>1</sub>), 1.30 – 1.11 (m, 8H, H<sub>12</sub> + H<sub>13</sub> + H<sub>14</sub> + H<sub>15</sub>), 0.88 – 0.82 (m, 3H, H<sub>16</sub>).

**$^{13}\text{C}$  NMR (126 MHz,  $\text{CDCl}_3$ )  $\delta$** :  $^{13}\text{C}$  NMR (126 MHz,  $\text{CDCl}_3$ )  $\delta$  172.0, 148.1, 141.6, 131.8, 130.5, 129.3, 127.9, 36.2, 35.3, 31.6, 31.6, 29.2, 28.9, 25.5, 22.6, 14.1.

**HRMS (ESI<sup>+</sup>)**:  $m/z$  calc'd for  $\text{C}_{18}\text{H}_{28}\text{ClNNaO}^+$   $[\text{M}+\text{Na}]^+$  332.1752; found 332.1758,  $\Delta$  1.8 ppm.

**FTIR (neat)  $\nu/\text{cm}^{-1}$** : 2957, 2926, 2855, 1692, 1485, 1364, 1159, 1051, 756.

**Chiral HPLC**: Chiralpak-IC column with guard; solvent ratio = 90:10 *n*-hexane: *i*-PrOH. Temperature = 25 °C. Flow rate = 1 ml/min,  $\lambda$  = 240 nm,  $\tau_{\text{ret}}$  = 7.0 min and 8.1 min.

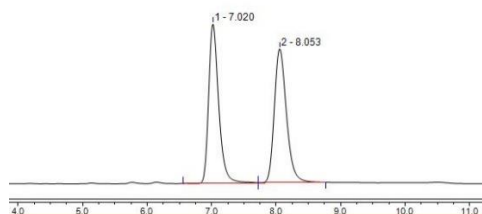

| Ret. Time<br>min | Amount<br>n.a. | Rel. Area<br>% | Area<br>mAU*min | Height<br>mAU |
|------------------|----------------|----------------|-----------------|---------------|
| 7.020            | n.a.           | 49.55          | 81.6236         | 452.89        |
| 8.053            | n.a.           | 50.45          | 83.1033         | 380.51        |

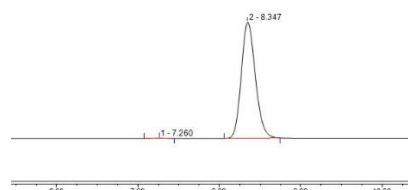

| Ret. Time<br>min | Amount<br>n.a. | Rel. Area<br>% | Area<br>mAU*min | Height<br>mAU |
|------------------|----------------|----------------|-----------------|---------------|
| 7.260            | n.a.           | 0.27           | 0.1421          | 0.86          |
| 8.347            | n.a.           | 99.73          | 51.6451         | 257.91        |

**Racemization study for 2c:** According to general procedure B, and using the conditions specified immediately above, an analytical quantity of the slower eluting enantiomer was collected by semipreparative HPLC and reinjected successively over time intervals shown below to calculate the rate of racemization.

| Time (s) | % maj. enantiomer | % min. enantiomer | ln(1/ee) |
|----------|-------------------|-------------------|----------|
| 0.00     | 99.73             | 0.27              | 0.00541  |
| 248640   | 93.72             | 6.28              | 0.134    |
| 335640   | 90.77             | 9.23              | 0.204    |
| 422580   | 87.86             | 12.14             | 0.278    |
| 507660   | 85.68             | 14.32             | 0.337    |
| 596460   | 83.38             | 16.62             | 0.404    |

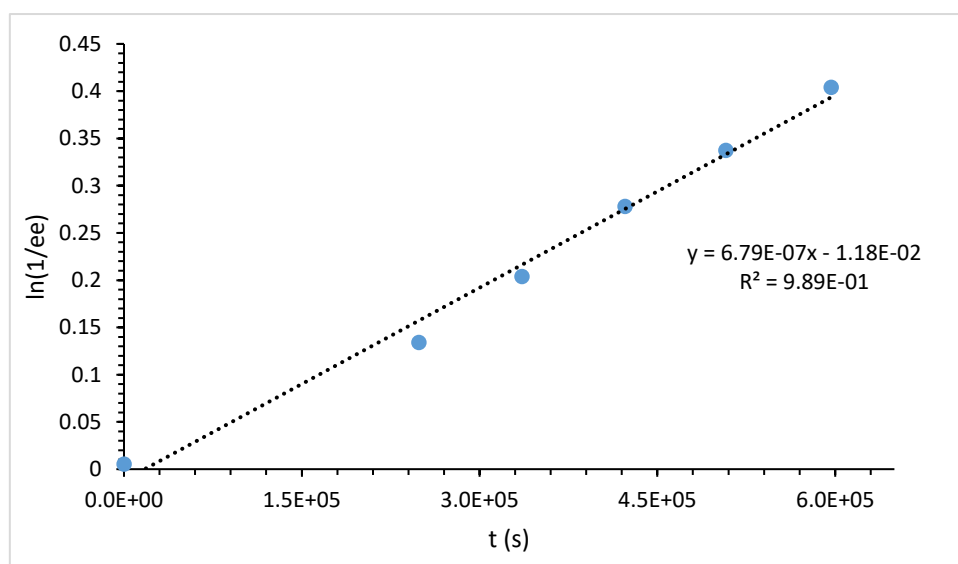

Therefore;  $k_{rac} = 6.79 \times 10^{-7} \text{ s}^{-1}$

$$t_{1rac} = 11.8 \text{ days}$$

$$\Delta G^\ddagger = 108.0 \text{ kJ/mol}$$

**rac-N-(2-(tert-Butyl)phenyl)-N-chloro-cyclopropanecarboxamide, 2d**

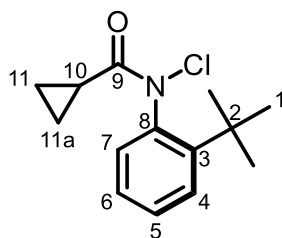

Synthesised from **1d** (100 mg, 0.460 mmol, 1.00 eq.), trichloroisocyanuric acid (118 mg, 0.506 mmol, 1.10 eq.) and CH<sub>2</sub>Cl<sub>2</sub> (4.2 mL) according to the general procedure A. Column chromatography (10% EtOAc/ petrol 40-60) afforded **2d** as an off white solid (100 mg, 86% yield).

**<sup>1</sup>H NMR (400 MHz, CDCl<sub>3</sub>)**  $\delta$ <sub>H</sub>: 7.47 (d, *J* = 8.0 Hz, 1H, H<sub>Ar</sub>), 7.32 (t, *J* = 7.9 Hz, 1H, H<sub>Ar</sub>), 7.25 – 7.17 (m, 2H, H<sub>Ar</sub>), 1.40 (s, 9H, H<sub>1</sub>), 1.25 (m, 1H, H<sub>10</sub>), 1.15 – 0.95 (m, 2H, H<sub>11</sub> and H<sub>11a</sub>), 0.66 (m, 2H, H<sub>11'</sub> and H<sub>11a'</sub>).

**<sup>13</sup>C NMR (75 MHz, CDCl<sub>3</sub>)**  $\delta$ <sub>C</sub>: 173.5, 148.8, 142.0, 132.4, 130.4, 129.0, 128.1, 36.3, 31.7, 14.3, 10.4, 10.0.

**HRMS (ESI<sup>+</sup>):** *m/z* calc'd for C<sub>14</sub>H<sub>18</sub>ClNNaO<sup>+</sup> [M+Na]<sup>+</sup> 274.0969; found 274.0963,  $\Delta$  2.2 ppm.

**FTIR (neat)  $\nu$ /cm<sup>-1</sup>** 2996, 2948, 2870, 1680, 1483, 1163, 760, 523.

**Melting point (°C)** 92-94.

**Chiral HPLC:** Chiralpak-IH column with guard; solvent ratio = 95:5 *n*-hexane: *i*-PrOH. Temperature = 25 °C. Flow rate = 1 ml/min,  $\lambda$  = 240 nm,  $\tau_{\text{ret}}$  = 6.2 min and 7.0 min.

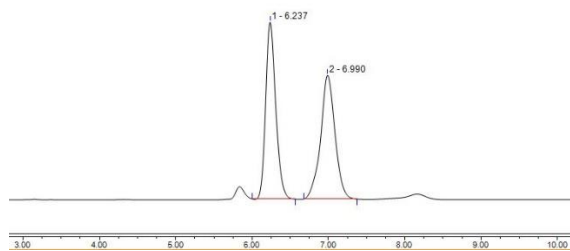

| Ret.Time<br>min | Amount<br>n.a. | Rel.Area<br>% | Area<br>mAU*min | Height<br>mAU |
|-----------------|----------------|---------------|-----------------|---------------|
| 6.237           | n.a.           | 49.95         | 53.5679         | 350.93        |
| 6.990           | n.a.           | 50.05         | 53.6718         | 245.61        |

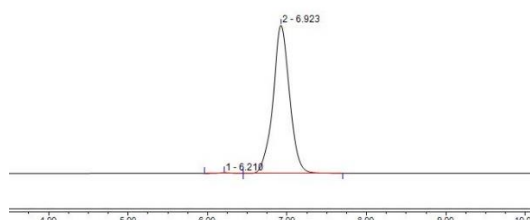

| Ret.Time<br>min | Amount<br>n.a. | Rel.Area<br>% | Area<br>mAU*min | Height<br>mAU |
|-----------------|----------------|---------------|-----------------|---------------|
| 6.210           | n.a.           | 0.28          | 0.1907          | 1.18          |
| 6.923           | n.a.           | 99.72         | 67.9289         | 281.58        |

**Racemization study for 2d:** According to general procedure B, and using the conditions specified immediately above, an analytical quantity of the slower eluting enantiomer was collected by semipreparative HPLC and reinjected successively over time intervals shown below to calculate the rate of racemization.

| Time (s)  | % maj. enantiomer | % min. enantiomer | ln(1/ee) |
|-----------|-------------------|-------------------|----------|
| 0.00      | 99.72             | 0.28              | 0.00602  |
| 2220.00   | 99.58             | 0.42              | 0.00844  |
| 85860.00  | 94.79             | 5.21              | 0.110    |
| 171960.00 | 89.76             | 10.24             | 0.229    |
| 262380.00 | 85.23             | 14.77             | 0.350    |

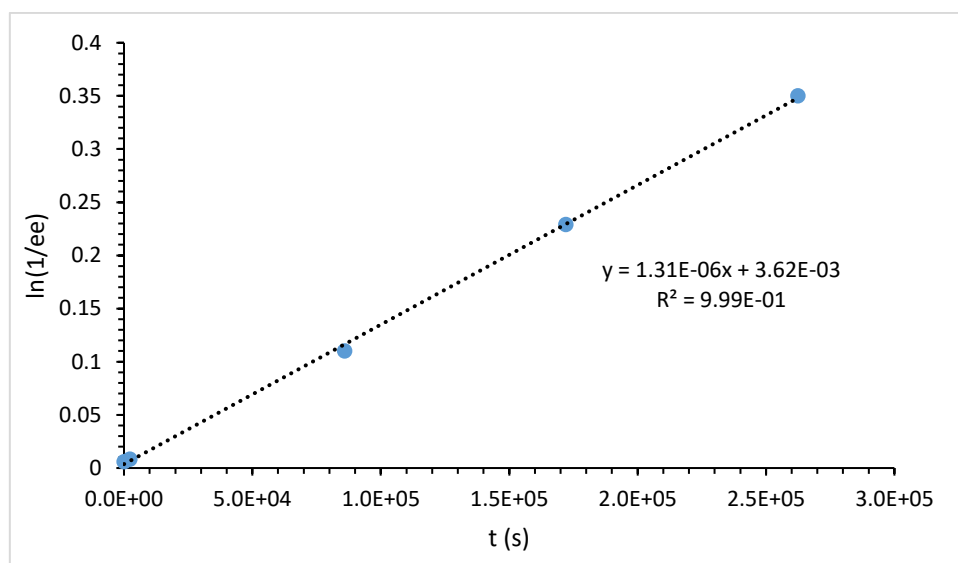

$$k_{rac} = 1.31 \times 10^{-6} \text{ s}^{-1}$$

$$t_{\frac{1}{2}rac} = 6.1 \text{ days}$$

$$\Delta G^\ddagger = 106.4 \text{ kJ/mol}$$

**rac-N-(2-(tert-Butyl)phenyl)-N-chloro-cyclobutanecarboxamide, 2e**

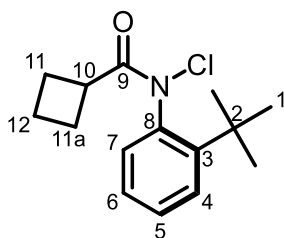

Synthesised from **1e** (150 mg, 0.649 mmol, 1.00 eq.), trichloroisocyanuric acid (166 mg, 0.714 mmol, 1.10 eq.) and CH<sub>2</sub>Cl<sub>2</sub> (5.9 mL) according to the general procedure A. Column chromatography (10% EtOAc/ petrol 40-60) yielded **2e** as an off white solid (93 mg, 54% yield).

**<sup>1</sup>H NMR (300 MHz, CDCl<sub>3</sub>)** δ<sub>H</sub>: 7.53 (m, 1H, H<sub>4</sub>), 7.38 (m, 1H, H<sub>5</sub>), 7.25 (ddd, *J* = 7.7, 7.2, 1.6 Hz, 1H, H<sub>6</sub>), 7.06 (m, 1H, H<sub>7</sub>), 3.05 – 2.85 (m, 1H, H<sub>10</sub>), 2.63 – 2.44 (m, 1H, H<sub>11</sub>), 2.36 – 2.15 (m, 1H, H<sub>11a</sub>), 1.99 – 1.71 (m, 4H, H<sub>11'</sub>, H<sub>11a'</sub> and H<sub>12</sub>), 1.41 (s, 9H, H<sub>1</sub>).

**<sup>13</sup>C NMR (75 MHz, CDCl<sub>3</sub>)** δ<sub>C</sub>: 174.1, 148.2, 141.6, 132.0, 130.5, 129.1, 127.8, 38.5, 36.3, 31.7, 27.7, 24.8, 18.1.

**HRMS (ESI<sup>+</sup>):** *m/z* calc'd for C<sub>15</sub>H<sub>20</sub>ClNNaO<sup>+</sup> [M+Na]<sup>+</sup> 288.1126; found 288.1102, Δ –8.3 ppm.

**FTIR (neat) ν/cm<sup>-1</sup>** 2997, 2947, 2871, 1681, 1483, 1249, 1162, 760, 693, 524.

**Melting point (°C):** 80-82.

**Chiral HPLC:** Chiralpak-IC column with guard; solvent ratio = 90:10 *n*-hexane: *i*PrOH. Temperature = 25 °C. Flow rate = 1 ml/min, λ = 240 nm, τ<sub>ret</sub> = 4.8 min and 5.9 min.

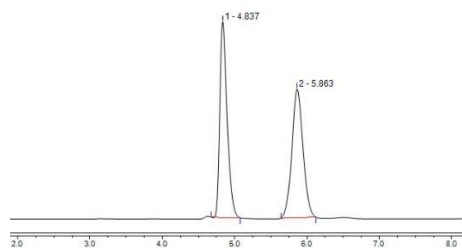

| Ret. Time min | Amount n.a. | Rel. Area % | Area mAU*min | Height mAU |
|---------------|-------------|-------------|--------------|------------|
| 4.837         | n.a.        | 50.03       | 62.4230      | 533.16     |
| 5.863         | n.a.        | 49.97       | 62.3567      | 351.25     |

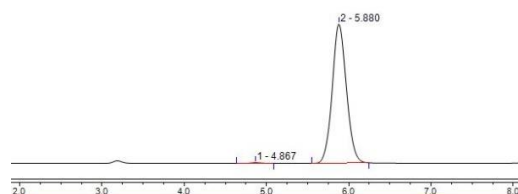

| Ret. Time min | Amount n.a. | Rel. Area % | Area mAU*min | Height mAU |
|---------------|-------------|-------------|--------------|------------|
| 4.867         | n.a.        | 0.32        | 0.2167       | 1.55       |
| 5.880         | n.a.        | 99.68       | 66.5150      | 332.85     |

**Racemization study for 2e:** According to general procedure B, and using the conditions specified immediately above, an analytical quantity of the slower eluting enantiomer was collected by semipreparative HPLC and reinjected successively over time intervals shown below to calculate the rate of racemization.

| Time (s) | % maj. enantiomer | % min. enantiomer | ln(1/ee) |
|----------|-------------------|-------------------|----------|
| 0        | 99.68             | 0.32              | 0.00642  |
| 1920     | 99.61             | 0.39              | 0.00783  |
| 10920    | 99.27             | 0.73              | 0.0147   |
| 76260    | 96.81             | 3.19              | 0.0659   |
| 161160   | 93.78             | 6.22              | 0.133    |

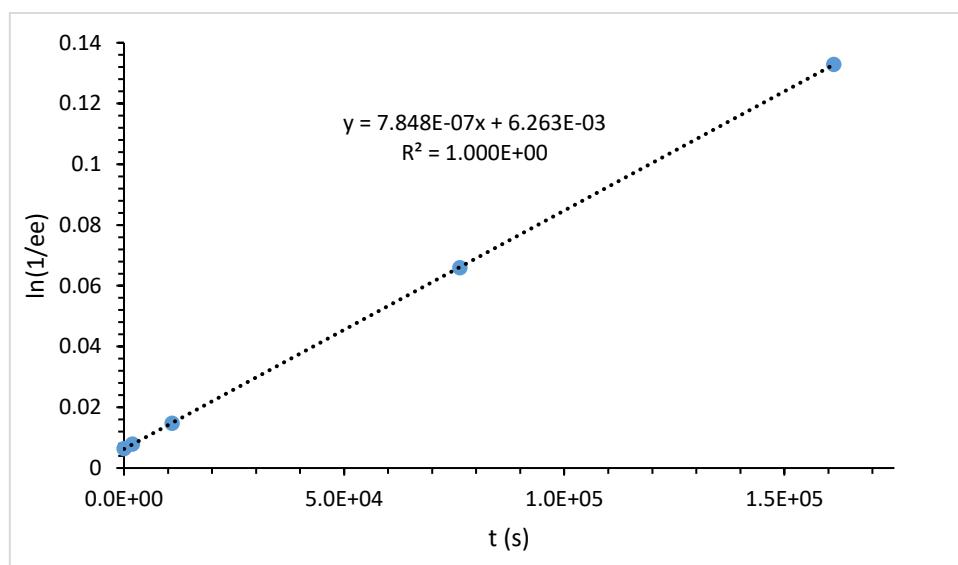

$$k_{rac} = 7.85 \times 10^{-7} \text{ s}^{-1}$$

$$t_{\frac{1}{2}rac} = 10.2 \text{ days}$$

$$\Delta G^\ddagger = 107.7 \text{ kJ/mol}$$

**rac-N-(2-(tert-Butyl)phenyl)-N-chloro-cyclopentanecarboxamide, 2f**

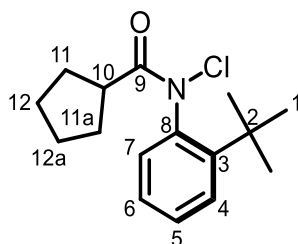

Synthesised from **1f** (300 mg, 1.22 mmol, 1.00 eq.), trichloroisocyanuric acid (311 mg, 1.34 mmol, 1.10 eq.) and CH<sub>2</sub>Cl<sub>2</sub> (11 mL) according to the general procedure A. Column chromatography (10% EtOAc/ petrol 40-60) yielded **2f** as a white solid (215 mg, 63% yield).

**<sup>1</sup>H NMR (300 MHz, CDCl<sub>3</sub>)**  $\delta$ <sub>H</sub>: 7.53 (m, 1H, H<sub>4</sub>), 7.38 (m, 1H, H<sub>5</sub>), 7.27 (td, *J* = 7.5, 1.6 Hz, 1H, H<sub>6</sub>), 7.17 (dd, *J* = 7.8, 1.6 Hz, 1H, H<sub>7</sub>), 2.48 (s, 1H, H<sub>10</sub>), 2.15 – 1.53 (m, 7H, H<sub>11</sub> + H<sub>11'</sub> + H<sub>11a</sub> + H<sub>11a'</sub> + H<sub>12</sub> + H<sub>12'</sub> + H<sub>12a</sub>), 1.53 – 1.32 (m, 10H, H<sub>1</sub> + H<sub>12a'</sub>).

**<sup>13</sup>C NMR (75 MHz, CDCl<sub>3</sub>)**  $\delta$ <sub>C</sub>: 176.6, 148.2, 141.9, 132.1, 130.4, 129.2, 127.8, 43.7, 36.4, 32.3, 31.7, 31.0, 26.4, 26.3.

**HRMS (ESI<sup>+</sup>):** *m/z* calc'd for C<sub>16</sub>H<sub>23</sub>ClNO [M+H]<sup>+</sup> 280.1463; found 280.1443,  $\Delta$  -7.1 ppm.

**FTIR (neat)  $\nu$ /cm<sup>-1</sup>** 2962, 2872, 1682, 1483, 1363, 1145, 760, 526.

**Melting point (°C):** 72-74.

**Chiral HPLC:** Chiralpak-IC column with guard; solvent ratio = 97:3 *n*-hexane: *i*PrOH. Temperature = 25 °C. Flow rate = 1 ml/min,  $\lambda$  = 240 nm,  $\tau_{\text{ret}}$  = 13.5 min and 14.4 min.

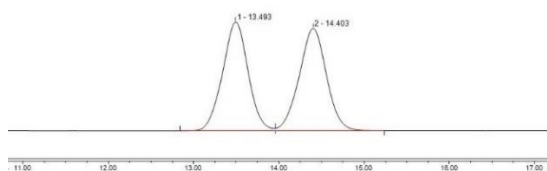

| Ret. Time<br>min | Amount<br>n.a. | Rel. Area<br>% | Area<br>mAU*min | Height<br>mAU |
|------------------|----------------|----------------|-----------------|---------------|
| 13.493           | n.a.           | 49.94          | 47.9895         | 138.17        |
| 14.403           | n.a.           | 50.06          | 48.0952         | 129.99        |

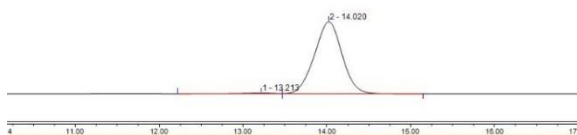

| Ret. Time<br>min | Amount<br>n.a. | Rel. Area<br>% | Area<br>mAU*min | Height<br>mAU |
|------------------|----------------|----------------|-----------------|---------------|
| 13.213           | n.a.           | 1.19           | 0.3979          | 0.81          |
| 14.020           | n.a.           | 98.81          | 32.9172         | 85.91         |

**Racemization study for 2f:** According to general procedure B, and using the conditions specified immediately above, an analytical quantity of the slower eluting enantiomer was collected by semipreparative HPLC and reinjected successively over time intervals shown below to calculate the rate of racemization.

| Time (s) | % maj. enantiomer | % min. enantiomer | ln(1/ee) |
|----------|-------------------|-------------------|----------|
| 0        | 98.81             | 1.19              | 0.0240   |
| 69300    | 96.17             | 3.83              | 0.0797   |
| 155400   | 92.06             | 7.94              | 0.173    |
| 245040   | 88.48             | 11.52             | 0.262    |

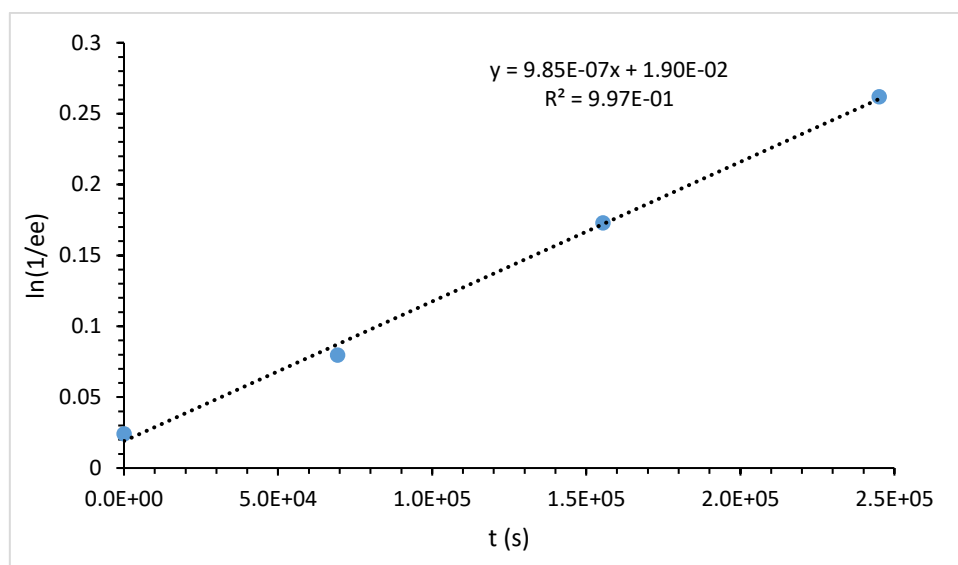

$$k_{rac} = 9.85 \times 10^{-7} \text{ s}^{-1}$$

$$t_{\frac{1}{2}rac} = \mathbf{8.1 \text{ days}}$$

$$\Delta G^\ddagger = \mathbf{107.1 \text{ kJ/mol}}$$



**rac-N-(2-(tert-Butyl)phenyl)-N-chloro-cyclohexanecarboxamide, 2g**

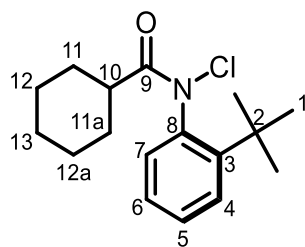

Synthesised from **1g** (100 mg, 0.386 mmol, 1 eq.), trichloroisocyanuric acid (99 mg, 0.42 mmol, 1.1 eq.) and CH<sub>2</sub>Cl<sub>2</sub> (3.5 mL) according to the general procedure A. Column chromatography (4% EtOAc/ petrol 40-60) yielded **2g** as a white solid (43 mg, 38% yield).

**<sup>1</sup>H NMR (300 MHz, CDCl<sub>3</sub>)** δ<sub>H</sub>: 7.53 (m, 1H, H<sub>4</sub>), 7.38 (m, 1H, H<sub>5</sub>), 7.26 (td, *J* = 7.7, 1.4 Hz, 1H, H<sub>6</sub>), 7.18 (d, *J* = 7.8 Hz, 1H, H<sub>7</sub>), 2.17 – 1.98 (m, 1H, H<sub>10</sub>), 1.83 – 1.55 (m, 6H, H<sub>11</sub> + H<sub>11</sub>' + H<sub>11a</sub> + H<sub>11a</sub>' + H<sub>12</sub> + H<sub>12</sub>'), 1.54 – 1.34 (m, 10H, H<sub>1</sub> + H<sub>12a</sub>), 1.33 – 0.72 (m, 3H, H<sub>13</sub> + H<sub>12a</sub>').

**<sup>13</sup>C NMR (75 MHz, CDCl<sub>3</sub>)** δ<sub>C</sub>: 175.0, 148.1, 141.5, 131.7, 130.4, 129.2, 127.6, 43.3, 36.3, 31.7, 29.8, 29.0, 25.6, 25.5, 25.3.

**HRMS (ESI<sup>+</sup>)**: *m/z* calc'd for C<sub>17</sub>H<sub>24</sub>ClNNaO<sup>+</sup> [M+Na]<sup>+</sup> 316.1439; found 316.1416, Δ –7.3 ppm.

**FTIR (neat) ν/cm<sup>-1</sup>**: 2935, 2848, 1693, 1483, 1319, 1248, 1158, 763, 693.

**Melting point (°C)**: 89-91.

**Chiral HPLC**: Chiralpak-IG column with guard; solvent ratio = 97:3 *n*-hexane: *i*PrOH. Temperature = 25 °C. Flow rate = 1 ml/min, λ = 240 nm, τ<sub>ret</sub> = 10.5 min and 11.5 min.

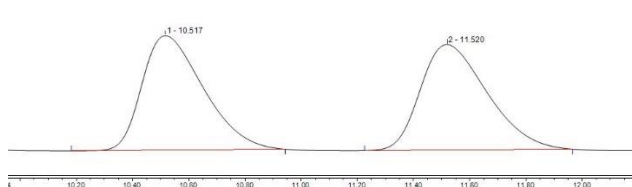

| Ret. Time<br>min | Amount<br>n.a. | Rel. Area<br>% | Area<br>mAU*min | Height<br>mAU |
|------------------|----------------|----------------|-----------------|---------------|
| 10.517           | n.a.           | 49.90          | 429.8618        | 1703.08       |
| 11.520           | n.a.           | 50.10          | 431.5424        | 1569.16       |

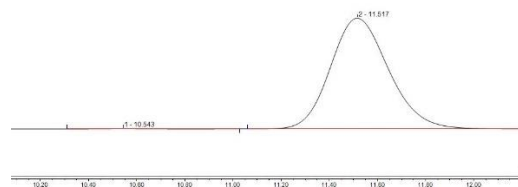

| Ret. Time<br>min | Amount<br>n.a. | Rel. Area<br>% | Area<br>mAU*min | Height<br>mAU |
|------------------|----------------|----------------|-----------------|---------------|
| 10.543           | n.a.           | 0.15           | 0.0661          | 0.35          |
| 11.517           | n.a.           | 99.85          | 45.4818         | 162.80        |

**Racemization study for 2g:** According to general procedure B, and using the conditions specified immediately above, an analytical quantity of the slower eluting enantiomer was collected by semipreparative HPLC and reinjected successively over time intervals shown below to calculate the rate of racemization.

| Time (s) | % maj. enantiomer | % min. enantiomer | ln(1/ee) |
|----------|-------------------|-------------------|----------|
| 0.00     | 99.85             | 0.15              | 0.00301  |
| 9000     | 98.99             | 1.01              | 0.0204   |
| 72600    | 92.83             | 7.17              | 0.155    |
| 159300   | 85.29             | 14.71             | 0.348    |
| 180120   | 83.80             | 16.20             | 0.392    |

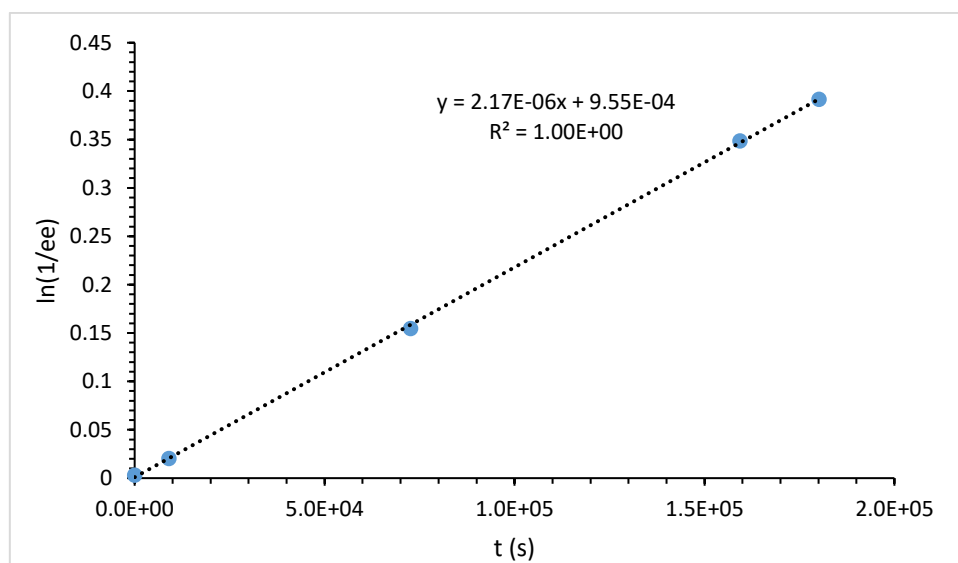

$$k_{rac} = 2.17 \times 10^{-6} \text{ s}^{-1}$$

$$t_{\frac{1}{2}rac} = 3.7 \text{ days}$$

$$\Delta G^{\ddagger} = 105.2 \text{ kJ/mol}$$

### *rac*-N-Chloro-N-(2-isopropylphenyl)-3-phenylpropanamide, **2h**

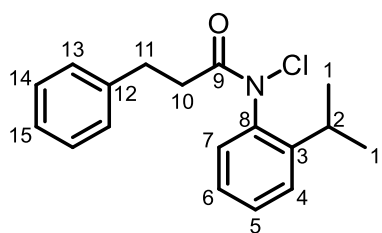

Synthesised from **1h** (100 mg, 0.374 mmol, 1.00 eq.), trichloroisocyanuric acid (96 mg, 0.41, mmol, 1.1 eq.) and CH<sub>2</sub>Cl<sub>2</sub> (3.4 mL) according to the general procedure A. Column chromatography (CH<sub>2</sub>Cl<sub>2</sub>) yielded **2h** as a clear oil (99 mg, 88% yield).

<sup>1</sup>H NMR (400 MHz, CDCl<sub>3</sub>) δ<sub>H</sub> 7.44 – 7.34 (m, 2H, H<sub>4</sub> + H<sub>5</sub>), 7.28 – 7.14 (m, 4H, H<sub>14</sub> + H<sub>15</sub> + H<sub>6</sub>), 7.10 – 7.00 (m, 3H, H<sub>13</sub> + H<sub>7</sub>), 3.19 – 3.07 (m, 1H, H<sub>2</sub>), 3.04 – 2.88 (m, 2H, H<sub>11</sub>), 2.49 – 2.36 (m, 1H, H<sub>10</sub>), 2.37 – 2.25 (m, 1H, H<sub>10'</sub>), 1.25 (d, J = 6.8 Hz, 3H, H<sub>1</sub>), 1.16 (d, J = 6.9 Hz, 3H, H<sub>1'</sub>).

<sup>13</sup>C NMR (101 MHz, CDCl<sub>3</sub>) δ<sub>C</sub> 170.1, 147.9, 140.6, 140.2, 131.0, 129.4, 128.7, 128.6, 127.6, 127.4, 126.5, 36.4, 31.9, 28.0, 24.2, 23.3.

HRMS (ESI<sup>+</sup>): m/z calc'd for C<sub>18</sub>H<sub>20</sub>ClN<sub>2</sub>O<sup>+</sup> [M+Na]<sup>+</sup> 324.1126; found 324.1126, Δ < 0.1 ppm.

IR (cm<sup>-1</sup>): 2929, 2965, 1690, 1487, 1363, 757, 700

Chiral HPLC: Chiralpak-IC column with guard; solvent ratio: 97:3 *n*-hexane: *i*-PrOH. Temperature = 5 °C. Flow rate = 1 ml/min, λ = 240 nm, τ<sub>ret</sub> = 15.4 min and 17.0 min.

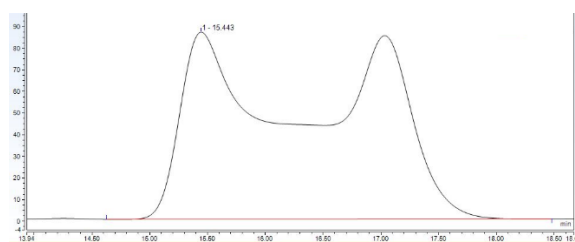

Racemization Barrier: The HPLC data was processed using DCXplorer to obtain  $k_{ent}$ :<sup>1,6</sup>

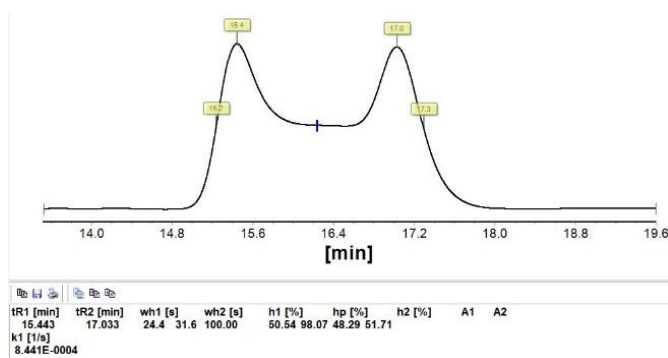

$$k_{ent} = 8.441 \times 10^{-4} \text{ s}^{-1} (5 \text{ }^\circ\text{C}) \text{ from DCXplorer}$$

$$\Delta G^\ddagger = 84.3 \text{ kJ/mol} (5 \text{ }^\circ\text{C})$$

Assuming  $\Delta G^\ddagger$  is invariant with temperature:

$$k_{rac} = 1.151 \times 10^{-2} \text{ s}^{-1} (20 \text{ }^\circ\text{C})$$

$$t_{1/2}^{rac} \approx 1 \text{ minute} (20 \text{ }^\circ\text{C})$$

**rac-N-Chloro-N-(2-fluoro-6-methylphenyl)-3-phenylpropanamide, 2i**

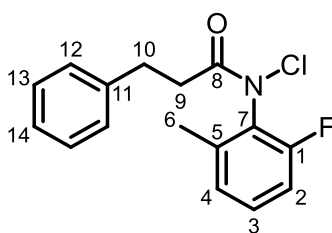

Synthesised from **1i** (100 mg, 0.389 mmol, 1.00 eq.), trichloroisocyanuric acid (99 mg, 0.43, mmol, 1.1 eq.) and CH<sub>2</sub>Cl<sub>2</sub> (3.5 mL) according to the general procedure A. Column chromatography (CH<sub>2</sub>Cl<sub>2</sub>) yielded **2i** as a clear oil (55 mg, 48% yield).

<sup>1</sup>H NMR (400 MHz, CDCl<sub>3</sub>) δ 7.34 – 7.28 (m, 1H, H<sub>3</sub>), 7.27 – 7.14 (m, 3H, H<sub>13</sub> + H<sub>14</sub>), 7.10 – 6.98 (m, 4H, H<sub>2</sub> + H<sub>4</sub> + H<sub>12</sub>), 3.03 – 2.90 (m, 2H, H<sub>10</sub>), 2.45 (ddd, *J* = 15.2, 9.0, 5.9 Hz, 1H, H<sub>9</sub>), 2.35 – 2.25 (m, 1H, H<sub>9'</sub>), 2.22 (s, 3H, H<sub>6</sub>).

Diagnostic signals for the minor amide isomer were observed at; 7.35 – 7.32 (m, H<sub>Ar</sub>), 3.12 – 3.05 (m, H<sub>9</sub>/H<sub>10</sub>), 2.26 (s, H<sub>6</sub>).

<sup>13</sup>C NMR (101 MHz, CDCl<sub>3</sub>) δ<sub>c</sub> 170.0, 159.2 (d, *J* = 253.2 Hz), 140.4 (d, *J* = 16.6 Hz), 131.7 (d, *J* = 8.7), 129.5 (d, *J* = 13.2 Hz), 128.7, 128.5, 126.8 (d, *J* = 3.5 Hz), 126.5, 114.4 (d, *J* = 20.0 Hz), 35.4, 31.6, 17.1 (d, *J* = 2.4 Hz).

N.B. One aromatic <sup>13</sup>C signal is not observed due to overlapping peaks.

<sup>19</sup>F NMR (376 MHz, CDCl<sub>3</sub>) δ<sub>F</sub> -119.30 (dd, *J* = 9.0, 5.5 Hz).

HRMS (ESI+): *m/z* calc'd for C<sub>16</sub>H<sub>15</sub>ClFNONa<sup>+</sup> [M+Na]<sup>+</sup> 314.0718; found 314.0714, Δ 1.3 ppm.

IR (cm<sup>-1</sup>): 3033, 2925, 1694, 1473, 1177, 701

Chiral HPLC: Chiralpak-IH column with guard; solvent ratio: 95:5 *n*-hexane: *i*PrOH. Temperature = 20 °C. Flow rate = 1 ml/min, λ = 240 nm, τ<sub>ret</sub> = 10.9 min and 12.2 min.

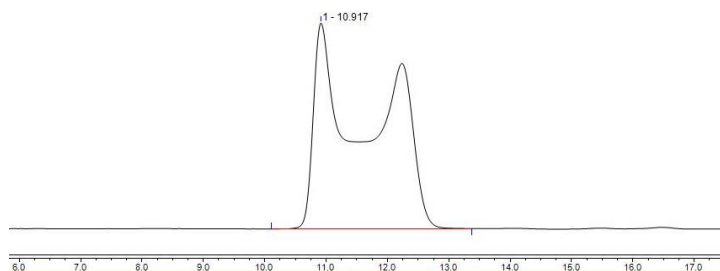

Racemization Barrier: The HPLC data was processed using DCXplorer to obtain *k*<sub>ent</sub>:<sup>1,6</sup>

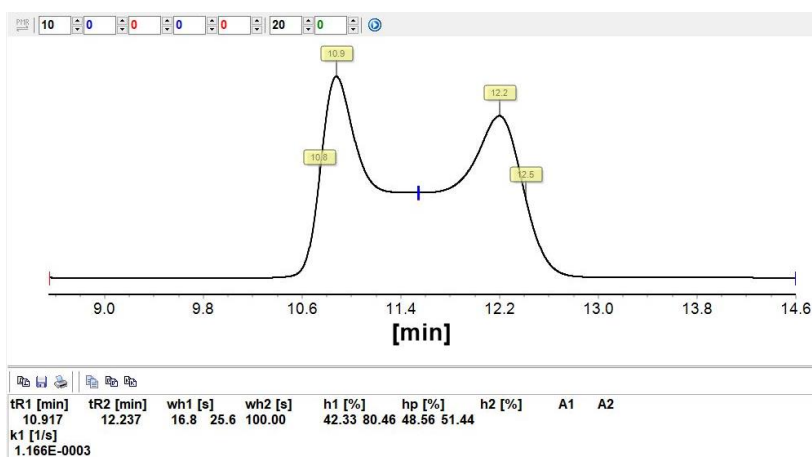

$$k_{ent} = 1.166 \times 10^{-3} \text{ s}^{-1} \text{ from DCXplorer}$$

$$\Delta G^\ddagger = 88.2 \text{ kJ/mol}$$

$$t_{\frac{1}{2}rac} = 5.0 \text{ minutes}$$

**rac-N-Chloro-N-(2-chloro-4,6-dimethylphenyl)-3-phenylpropanamide, 2j**

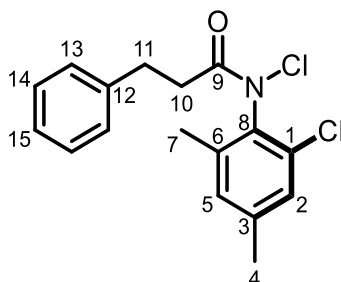

Synthesised from **1j** (100 mg, 0.347 mmol, 1.0 eq.), trichloroisocyanuric acid (89 mg, 0.38 mmol, 1.1 eq.) and  $\text{CH}_2\text{Cl}_2$  (3.1 mL) according to the general procedure A. Column chromatography (15%  $\text{Et}_2\text{O}$ / petrol 40:60) afforded **2j** as a colourless oil (102 mg, 91% yield).

**$^1\text{H}$  NMR (300 MHz,  $\text{CDCl}_3$ )  $\delta_{\text{H}}$ :**  $\delta$  7.33 – 7.16 (m, 3H,  $\text{H}_{\text{Ar}}$ ), 7.15 (s, 1H,  $\text{H}_2$ ), 7.12 – 7.07 (m, 2H,  $\text{H}_{\text{Ar}}$ ), 6.98 (s, 1H,  $\text{H}_5$ ), 3.04 – 2.93 (m, 2H,  $\text{H}_{11}$ ), 2.49 – 2.36 (m, 1H,  $\text{H}_{10}$ ), 2.34 (s, 3H,  $\text{H}_4$ ) 2.32 – 2.21 (m, 1H,  $\text{H}_{10}'$ ), 2.17 (s, 3H,  $\text{H}_7$ ).

**$^{13}\text{C}$  NMR (75 MHz,  $\text{CDCl}_3$ )  $\delta_{\text{C}}$ :** 169.8, 142.1, 140.7, 139.8, 136.0, 134.5, 130.7, 128.9, 128.6, 128.6, 126.4, 35.5, 31.6, 21.2, 17.9.

**$^1\text{H}$  NMR (700 MHz,  $\text{C}_6\text{D}_6$ )  $\delta_{\text{H}}$ :** 7.04 – 7.00 (m, 2H,  $\text{H}_{\text{Ar}}$ ), 7.00 – 6.94 (m, 3H,  $\text{H}_{\text{Ar}}$ ), 6.66 (s, 1H,  $\text{H}_2$ ), 6.30 (s, 1H,  $\text{H}_5$ ), 3.08 (dt,  $J = 13.9, 7.8$  Hz, 1H,  $\text{H}_{11}$ ), 2.87 (ddd,  $J = 13.9, 8.0, 6.0$  Hz, 1H,  $\text{H}_{11}'$ ), 2.38 (ddd,  $J = 16.1, 8.0, 6.0$  Hz, 1H,  $\text{H}_{10}$ ), 2.13 (dt,  $J = 15.9, 7.8$  Hz, 1H,  $\text{H}_{10}$ ), 1.80 (s, 3H,  $\text{H}_7$ ), 1.70 (s, 3H,  $\text{H}_4$ ).

Diagnostic signals for the minor *trans*-isomer were observed at:  $\delta$  7.15 – 7.13 (m,  $\text{H}_{\text{Ar}}$ ), 7.10 – 7.06 (m,  $\text{H}_{\text{Ar}}$ ), 6.80 (s, 1H,  $\text{H}_2$ ), 6.44 (s, 1H,  $\text{H}_5$ ), 2.03 (s,  $\text{H}_7$ ), 1.76 (s,  $\text{H}_4$ ). The identity of the major geometrical isomer was assigned as *cis*- on the basis of NOE correlations between  $\text{H}_7$  and  $\text{H}_{10}$  (see spectra). A ratio of 85:15 *cis/trans* was measured from the  $^1\text{H}$  NMR data collected in  $\text{C}_6\text{D}_6$ .

**$^{13}\text{C}$  NMR (125 MHz,  $\text{C}_6\text{D}_6$ )  $\delta_{\text{C}}$ :** 172.6 (min.), 168.7 (maj.), 141.5 (maj.), 141.2 (maj.), 141.2 (min.), 140.7 (min.), 140.0 (maj.), 139.5 (min.), 137.2 (min.), 136.7 (maj.), 134.7 (maj.), 134.1 (min.), 130.6 (maj.), 130.2 (min.), 128.9 (min.), 128.8 (maj.), 128.8 (maj.), 128.8 (maj.), 128.4 (min.), 126.5 (maj.), 35.8 (maj.), 35.0 (min.), 31.9 (maj.), 31.2 (min.), 20.7 (maj.), 17.9 (min.), 17.6 (min.), 17.5 (maj.). N.B. Two aromatic  $^{13}\text{C}$  signals for the minor isomer were not observed, presumably as a result of overlap with the residual solvent peak for benzene.

**HRMS (ESI<sup>+</sup>):**  $m/z$  calc'd for  $\text{C}_{17}\text{H}_{18}\text{Cl}_2\text{NO}^+$   $[\text{M}+\text{H}]^+$  322.0760; found 322.0776,  $\Delta$  5.0 ppm.

**FTIR (neat)  $\nu/\text{cm}^{-1}$ :** 3028, 2924, 1697, 1452, 1358, 1296, 1181, 851, 739, 699, 569.

**Chiral HPLC:** Chiralpak-IA column with guard; solvent ratio = 97.5:2.5 *n*-hexane: *i*PrOH. Temperature = 25 °C. Flow rate = 1 ml/min,  $\lambda$  = 240 nm,  $\tau_{ret}$  = 10.9 min and 13.3 min.

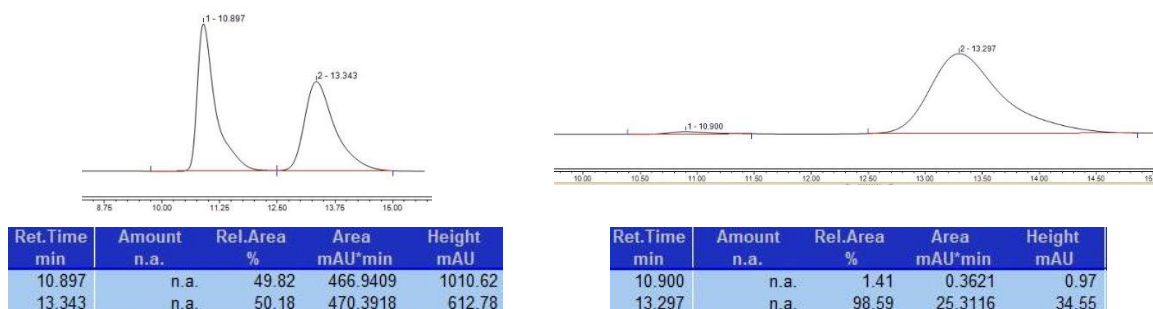

**Racemization study for 2j:** According to general procedure B, and using the conditions specified immediately above, an analytical quantity of the slower eluting enantiomer was collected by semipreparative HPLC and reinjected successively over time intervals shown below to calculate the rate of racemization.

| Time (s) | % maj. enantiomer | % min. enantiomer | ln(1/ee) |
|----------|-------------------|-------------------|----------|
| 0        | 98.59             | 1.41              | 0.0286   |
| 3720     | 97.06             | 2.94              | 0.0606   |
| 7440     | 95.99             | 4.01              | 0.0836   |
| 11160    | 95.02             | 4.98              | 0.105    |
| 14880    | 94.20             | 5.80              | 0.123    |
| 18600    | 93.27             | 6.73              | 0.145    |
| 22320    | 92.29             | 7.71              | 0.167    |
| 26100    | 91.26             | 8.74              | 0.192    |

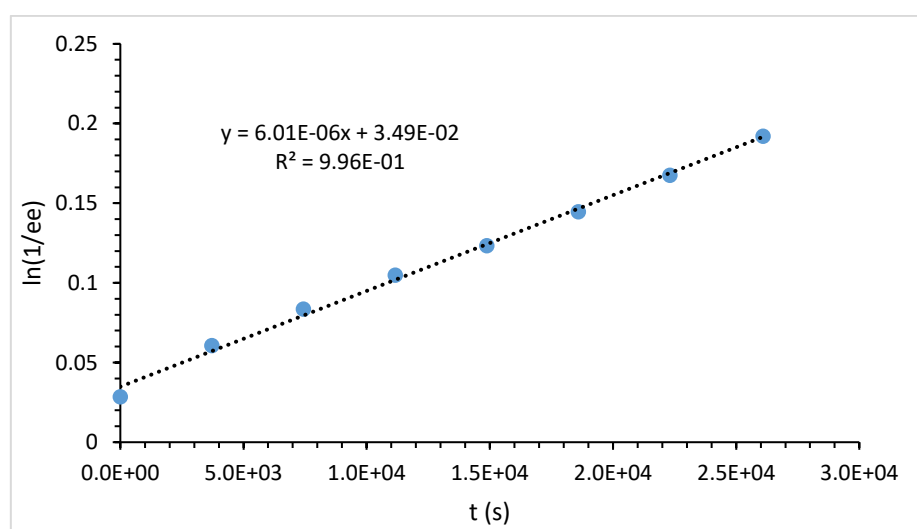

$$k_{rac} = 6.01 \times 10^{-6} \text{ s}^{-1}$$

$$t_{1rac} = \frac{32 \text{ hours}}{2}$$

$$\Delta G^\ddagger = 102.7 \text{ kJ/mol}$$

**rac-N-(2-Bromo-4,6-dimethylphenyl)-N-chloro-3-phenylpropanamide, 2k**

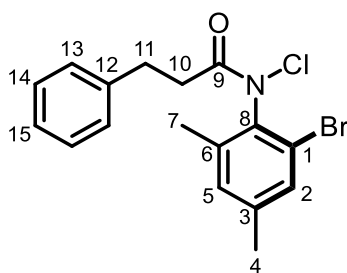

Synthesised from **1k** (100 mg, 0.302 mmol, 1.0 eq.), trichloroisocyanuric acid (77 mg, 0.33 mmol, 1.1 eq.) and CH<sub>2</sub>Cl<sub>2</sub> (2.8 mL) according to the general procedure A. Column chromatography (CH<sub>2</sub>Cl<sub>2</sub>) afforded **2k** as a colourless oil (89 mg, 80% yield).

**<sup>1</sup>H NMR (400 MHz, CDCl<sub>3</sub>)** δ<sub>H</sub> 7.35 – 7.31 (m, 1H, H<sub>2</sub>), 7.27 – 7.20 (m, 2H, H<sub>14</sub>), 7.20 – 7.14 (m, 1H, H<sub>15</sub>), 7.13 – 7.07 (m, 2H, H<sub>13</sub>), 7.04 – 6.98 (m, 1H, H<sub>5</sub>), 3.04 – 2.91 (m, 2H, H<sub>11</sub>), 2.49 – 2.39 (m, 1H, H<sub>10</sub>), 2.32 (s, 3H, H<sub>4</sub>), 2.30 – 2.18 (m, 1H, H<sub>10'</sub>), 2.18 (s, 3H, H<sub>7</sub>).

Diagnostic peaks for the minor amide isomer were observed at; 7.30 (s, H<sub>2</sub>), 3.08 – 3.04 (m, H<sub>10</sub>/H<sub>11</sub>), 2.30 (s, H<sub>4</sub>), 2.24 (s, H<sub>7</sub>).

**<sup>13</sup>C NMR (101 MHz, CDCl<sub>3</sub>)** δ<sub>C</sub> 169.6, 142.4, 140.7, 140.0, 137.4, 132.2, 131.5, 128.6, 126.4, 125.0, 35.8, 31.7, 21.1, 18.3.

N.B. Two <sup>13</sup>C signals are overlapping at 128.6 ppm

**HRMS (ESI<sup>+</sup>):** m/z calc'd for C<sub>17</sub>H<sub>18</sub>BrClNO<sup>+</sup> [M+H]<sup>+</sup> 366.0255; found 366.0244, Δ 3.0 ppm.

**FTIR (neat) v/cm<sup>-1</sup>:** 3027, 2922, 1695, 1307, 699

**Chiral HPLC:** Chiralpak-IA column; solvent ratio = 95:5 *n*-hexane: *i*PrOH. Temperature = 25 °C. Flow rate = 1 ml/min, λ = 240 nm, τ<sub>ret</sub> = 8.5 min and 9.7 min.

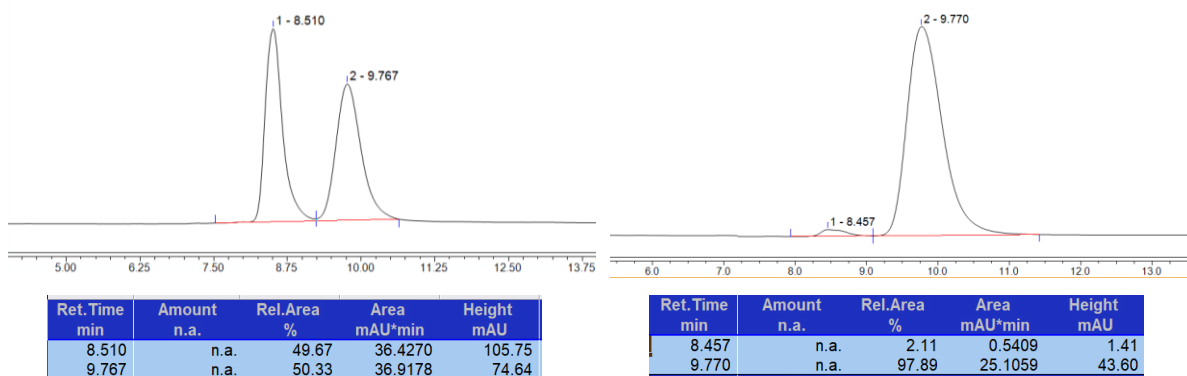

**Racemization study for 2k** According to general procedure B, and using the conditions specified immediately above, an analytical quantity of the slower eluting enantiomer was collected by semipreparative HPLC and reinjected successively over time intervals shown below to calculate the rate of racemization.

| Time (s) | % maj. enantiomer | % min. enantiomer | ln(1/ee) |
|----------|-------------------|-------------------|----------|
| 0.00     | 97.89             | 2.11              | 0.0431   |
| 24480    | 96.52             | 3.48              | 0.0721   |
| 81180    | 93.92             | 6.08              | 0.130    |
| 112740   | 92.3              | 7.7               | 0.167    |

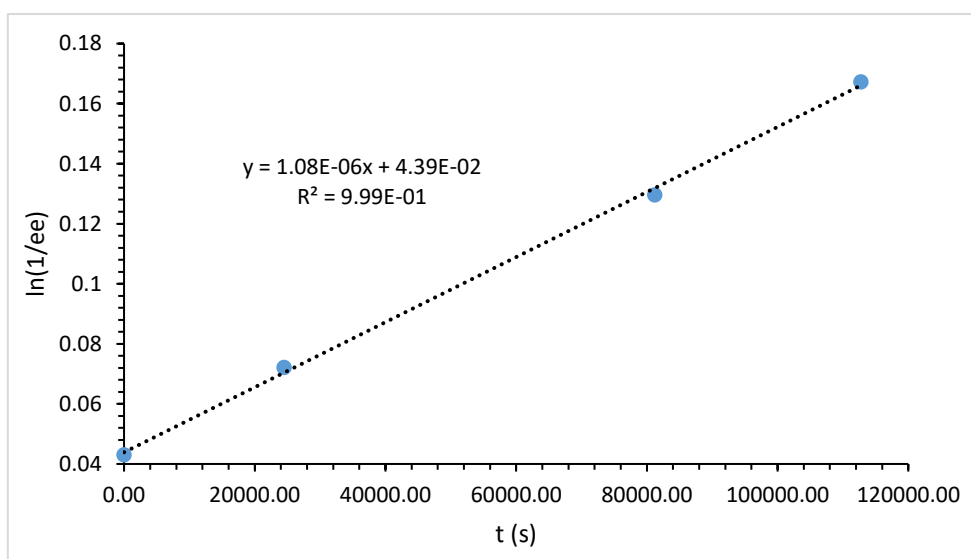

$$k_{rac} = 1.08 \times 10^{-6} \text{ s}^{-1}$$

$$t_{\frac{1}{2}rac} = 7.4 \text{ days}$$

$$\Delta G^\ddagger = 106.9 \text{ kJ/mol}$$



***rac*-N-(2-(*tert*-Butyl)phenyl)-N-chloro-benzamide, 2I**

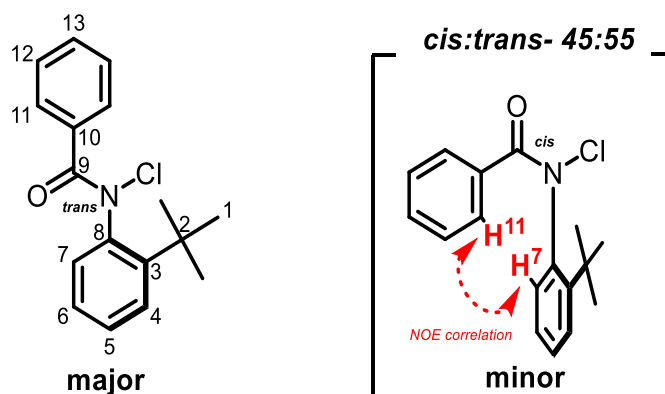

Synthesised from **1I** (250 mg, 0.987 mmol, 1.00 eq.), trichloroisocyanuric acid (252 mg, 1.09 mmol, 1.10 eq.), and CH<sub>2</sub>Cl<sub>2</sub> (9.0 mL), according to general procedure A. Column Chromatography (10% EtOAc/ pentane) afforded **2I** as a yellow solid (277 mg, 98% yield).

**<sup>1</sup>H NMR (400 MHz, CDCl<sub>3</sub>, 298 K)** δ<sub>H</sub> 7.69 – 7.53 (m, 2H, H<sub>Ar</sub>), 7.48 (dd, *J* = 8.1, 1.6 Hz, 1H, H<sub>Ar</sub>), 7.44 – 7.23 (m, 6H, H<sub>Ar</sub>), 1.45 (s, 9H, H<sub>1</sub>).

**<sup>13</sup>C NMR (75 MHz, CDCl<sub>3</sub>, 298 K)** δ<sub>C</sub> 148.0, 142.6, 133.5, 132.3, 131.2, 130.0, 129.1, 129.1, 128.1, 127.8, 36.2, 31.7. (N.B. <sup>13</sup>C signal for C=O not observed due to signal broadening)

**<sup>1</sup>H NMR (500 MHz, CDCl<sub>3</sub>, 218 K)** δ<sub>H</sub>: 7.91 – 7.83 (m, 2H, H<sub>11Maj.</sub>), 7.63 – 7.57 (m, 1H, H<sub>13Maj.</sub>), 7.57 – 7.51 (m, 3H, H<sub>12Maj.</sub> + H<sub>4Maj.</sub>), 7.49 (dd, *J* = 8.2, 1.5 Hz, 1H, H<sub>4Min.</sub>), 7.47 – 7.42 (m, 3H, H<sub>5Maj.</sub>, H<sub>6Maj.</sub>, H<sub>7Maj.</sub>), 7.39 – 7.31 (m, 4H, H<sub>5Min.</sub>, H<sub>11Min.</sub>, and H<sub>13Min.</sub>), 7.26 (dd, *J* = 7.9, 1.6 Hz, 1H, H<sub>7Min.</sub>), 7.24 – 7.16 (m, 3H, H<sub>6Min.</sub> and H<sub>12Min.</sub>), 1.49 (s, 9H, H<sub>1Maj.</sub>), 1.35 (s, 9H, H<sub>1Min.</sub>)

The identity of the *minor* geometrical isomer was assigned as *cis*- on the basis of NOE correlations between H<sub>11</sub> and H<sub>7</sub> (see spectra). A ratio of 45:55 *cis/trans* was measured from the <sup>1</sup>H NMR data collected at 218 K.

**<sup>13</sup>C NMR (126 MHz, CDCl<sub>3</sub>, 218 K):** δ<sub>C</sub> 175.7 (maj.), 167.5 (min.), 147.3 (maj.), 147.0 (min.), 142.7 (maj.), 140.7 (min.), 132.7 (maj.), 132.3 (min.), 132.2 (maj.), 132.0 (min.), 131.3 (maj.), 130.9 (min.), 130.5 (maj.), 130.2 (min.), 129.8 (maj.), 129.3 (maj.), 128.8 (min.), 128.3 (min.), 128.2 (maj.), 127.9 (maj.), 127.7 (min.), 127.4 (min.), 36.6 (min.), 35.4 (maj.), 31.7 (min.), 30.8 (maj.).

**FTIR (neat) v/cm<sup>-1</sup>** 3059, 2992, 2970, 2875, 1692, 1458

**HRMS (ESI):** *m/z* calc'd for C<sub>17</sub>H<sub>19</sub>ClNO<sup>+</sup>[M+H]<sup>+</sup> 288.1150; found 288.1142 Δ -2.8 ppm

**Melting Point (°C):** 46-48

**Chiral HPLC:** Chiralpak-IC column with guard; solvent ratio = 90:10 *n*-hexane: *i*PrOH. Temperature = 25 °C. Flow rate = 1 ml/min,  $\lambda = 240$  nm,  $\tau_{\text{ret}} = 9.9$  min and 12.1 min.

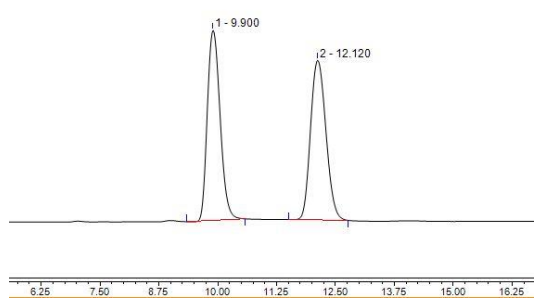

| Ret. Time min | Amount n.a. | Rel. Area % | Area mAU*min | Height mAU |
|---------------|-------------|-------------|--------------|------------|
| 9.900         | n.a.        | 49.67       | 103.6940     | 330.63     |
| 12.120        | n.a.        | 50.33       | 105.0745     | 277.65     |

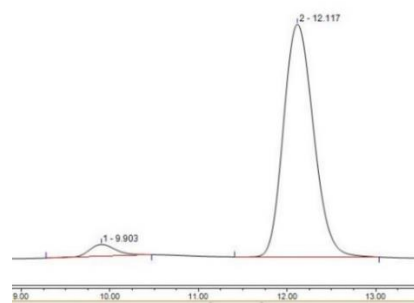

| Ret. Time min | Amount n.a. | Rel. Area % | Area mAU*min | Height mAU |
|---------------|-------------|-------------|--------------|------------|
| 9.903         | n.a.        | 4.22        | 2.8987       | 8.48       |
| 12.117        | n.a.        | 95.78       | 65.7343      | 167.57     |

**Racemization study for 2l:** According to general procedure B, and using the conditions specified immediately above, an analytical quantity of the slower eluting enantiomer was collected by semipreparative HPLC and reinjected successively over time intervals shown below to calculate the rate of racemization.

Data from run 1:

| Time (s) | % maj. enantiomer | % min. enantiomer | ln(1/ee) |
|----------|-------------------|-------------------|----------|
| 0        | 95.78             | 4.22              | 0.0882   |
| 900      | 88.61             | 11.39             | 0.259    |
| 1860     | 81.93             | 18.07             | 0.448    |
| 2820     | 76.42             | 23.58             | 0.638    |
| 3660     | 72.07             | 27.93             | 0.818    |

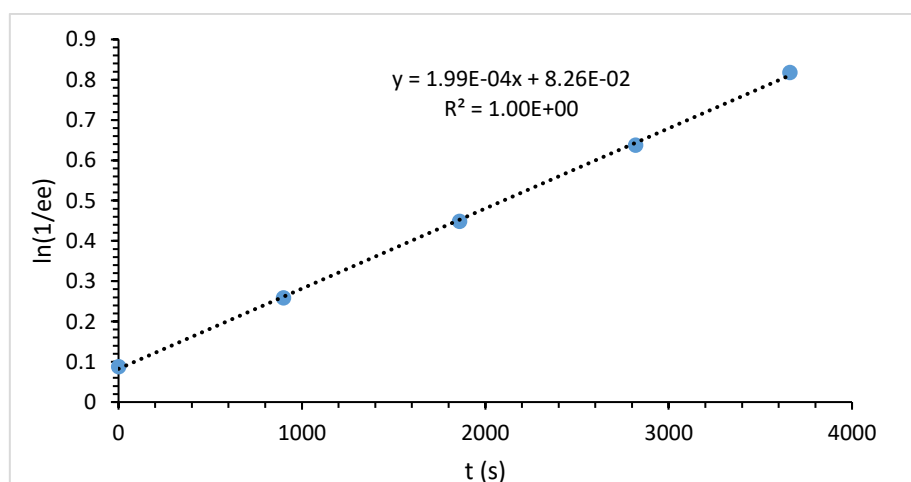

$$k_{\text{rac}} = 1.99 \times 10^{-4} \text{ s}^{-1}$$

$$t_{1/2}^{\text{rac}} = 58 \text{ minutes}$$

$$\Delta G^\ddagger = 94.2 \text{ kJ/mol}$$

Data from run 2:

| Time (s) | % maj. enantiomer | % min. enantiomer | ln(1/ee) |
|----------|-------------------|-------------------|----------|
| 0        | 97.43             | 2.57              | 0.052768 |
| 1020     | 88.76             | 11.24             | 0.254634 |
| 2040     | 81.75             | 18.25             | 0.45413  |
| 3060     | 76.1              | 23.9              | 0.650088 |
| 4080     | 71.33             | 28.67             | 0.851908 |

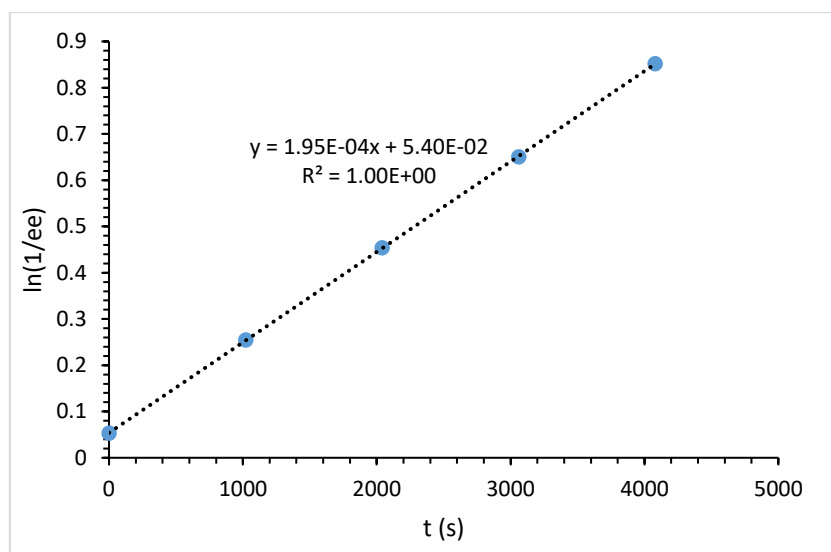

$$k_{rac} = 1.95 \times 10^{-4} \text{ s}^{-1}$$

$$t_{\frac{1}{2}rac} = \mathbf{59 \text{ minutes}}$$

$$\Delta G^\ddagger = \mathbf{94.2 \text{ kJ/mol}}$$

**rac-N-(2-(tert-Butyl)phenyl)-N-chloro-4-(trifluoromethyl)benzamide, 2m**

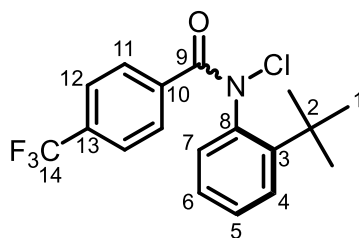

Synthesised from **1m** (150 mg, 0.467 mmol, 1.0 eq.), trichloroisocyanuric acid (119 mg, 0.513 mmol, 1.10 eq.) and CH<sub>2</sub>Cl<sub>2</sub> (4.3 mL), according to general procedure A. Column chromatography (5% EtOAc/ petrol 40-60) afforded **2m** as a white solid (130 mg, 78% yield).

**<sup>1</sup>H NMR (500 MHz, CDCl<sub>3</sub>, 218 K)** δ<sub>H</sub>: δ 7.96 (d, *J* = 8.0 Hz, 2H, H<sub>11Maj.</sub>), 7.79 (d, *J* = 8.0 Hz, 2H, H<sub>12Maj.</sub>), 7.56 – 7.34 (m, 10H, H<sub>Ar</sub>), 7.30 – 7.19 (m, 2H, H<sub>Ar</sub>), 1.49 (s, 9H H<sub>Maj.</sub>), 1.36 (s, 9H, H<sub>1Min.</sub>).

**<sup>13</sup>C NMR (126 MHz, CDCl<sub>3</sub>, 218 K)**: δ<sub>C</sub> 174.2 (Maj.), 166.1 (Min.), 147.4 (Maj.), 147.1 (Min.), 142.1 (Maj.), 140.1 (Min.), 136.4 (Maj.), 135.9 (Min.), 132.7 (q, *J* = 32.7 Hz, Maj.), 132.2 (Maj.), 131.8 (q, *J* = 32.7 Hz, Min.), 131.2 (Min.), 130.7 (Min.), 130.7 (Maj.), 130.1 (Min.), 129.7 (Maj.), 129.0 (Min.), 128.3z (Maj.), 127.9 (Min.), 127.6 (Maj.), 125.3 (q, *J* = 3.6 Hz Min.), 125.0 (q, *J* = 3.6 Hz, Maj.), 123.4 (q, *J* = 272.9 Hz, Maj.), 123.2 (q, *J* = 272.9 Hz, Min.), 36.6 (Min.), 35.4 (Maj.), 31.7 (Min.), 30.9 (Maj.).

**<sup>19</sup>F NMR (282 MHz, CDCl<sub>3</sub>, 298 K)**: δ<sub>F</sub> –63.1.

**FTIR (neat) v/cm<sup>-1</sup>**: 2962, 1673, 1619, 1580, 1514, 1484, 1316, 1167, 851, 757.

**HRMS (ESI)**: *m/z* calc'd for C<sub>18</sub>H<sub>18</sub>ClF<sub>3</sub>NO<sup>+</sup>[M+H]<sup>+</sup> 356.1024; found 356.1006. Δ –5.1 ppm.

**Melting Point (°C)**: 66-68.

**Chiral HPLC**: Chiralpak-IC column with guard; solvent ratio = 97.5:2.5 *n*-hexane: <sup>i</sup>PrOH. Temperature = 25 °C. Flow rate = 1 ml/min, λ = 240 nm, τ<sub>ret</sub> = 9.9 min and 12.1 min.

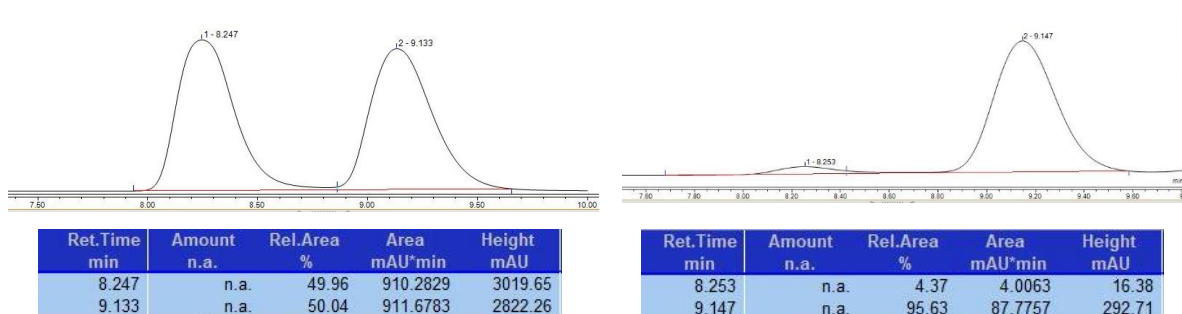

**Racemization study for 2m:** According to general procedure B, and using the conditions specified immediately above, an analytical quantity of the slower eluting enantiomer was collected by semipreparative HPLC and reinjected successively over time intervals shown below to calculate the rate of racemization.

| Time (s) | % maj. enantiomer | % min. enantiomer | ln(1/ee) |
|----------|-------------------|-------------------|----------|
| 0        | 95.78             | 4.22              | 0.0882   |
| 780      | 92.30             | 7.70              | 0.167    |
| 1500     | 88.27             | 11.73             | 0.267    |
| 2220     | 85.19             | 14.81             | 0.351    |
| 2940     | 82.34             | 17.66             | 0.436    |

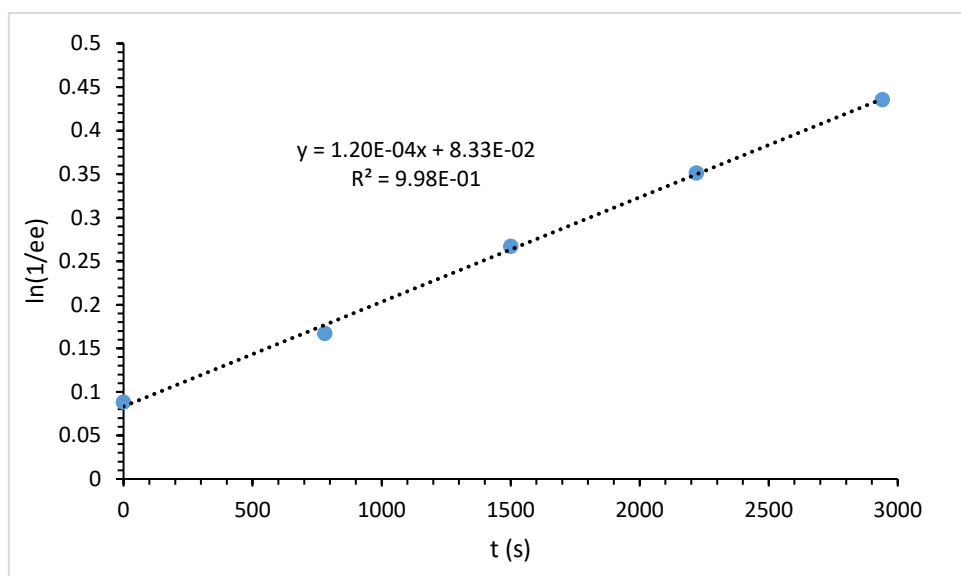

$$k_{rac} = 1.20 \times 10^{-4} \text{ s}^{-1}$$

$$t_{\frac{1}{2}rac} = \mathbf{96 \text{ minutes}}$$

$$\Delta G^\ddagger = \mathbf{95.4 \text{ kJ/mol}}$$

**rac-N-(2-(tert-Butyl)phenyl)-N-chloro-4-methoxybenzamide, 2n**

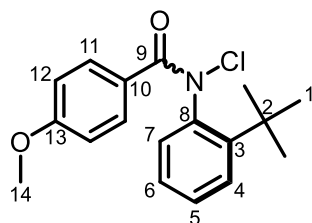

Synthesised from **1n** (200 mg, 0.706 mmol, 1.00 eq.), trichloroisocyanuric acid (180 mg, 0.775 mmol, 1.1 eq.) and CH<sub>2</sub>Cl<sub>2</sub> (6.5 mL) according to the general procedure A. Column Chromatography (7% EtOAc/ petrol 40-60) yielded **2n** as a gummy solid (143 mg, 64% yield).

<sup>1</sup>H NMR (300 MHz, CDCl<sub>3</sub>) δ<sub>H</sub>: 7.56 (d, *J* = 8.5 Hz, 2H, H<sub>11</sub>), 7.49 (dd, *J* = 8.0, 1.5 Hz, 1H, H<sub>Ar</sub>), 7.40 – 7.19 (m, 3H, 3 H<sub>Ar</sub>), 6.81 (d, *J* = 8.5 Hz, 2H, H<sub>12</sub>), 3.80 (s, 3H, H<sub>14</sub>), 1.45 (s, 9H, H<sub>1</sub>).

<sup>13</sup>C NMR (75 MHz, CDCl<sub>3</sub>): δ<sub>C</sub> 161.9, 147.7, 143.0, 132.3, 131.5, 129.8, 128.9, 127.6, 125.2, 113.4, 113.3, 55.4, 36.1, 31.6.

FTIR (neat) ν/cm<sup>-1</sup>: 2960, 2839, 1664, 1604, 1509, 1295, 1253, 1173, 758, 600.

HRMS (ESI): *m/z* calc'd for C<sub>18</sub>H<sub>21</sub>ClNO<sub>2</sub><sup>+</sup> [M+H]<sup>+</sup> 318.1255; found 318.1258 Δ 0.94 ppm.

Chiral HPLC: Chiralpak-IC column with guard; solvent ratio = 75:25 *n*-hexane: *i*PrOH. Temperature = 25 °C. Flow rate = 1 ml/min, λ = 240 nm, τ<sub>ret</sub> = 10.8 min and 12.6 min.

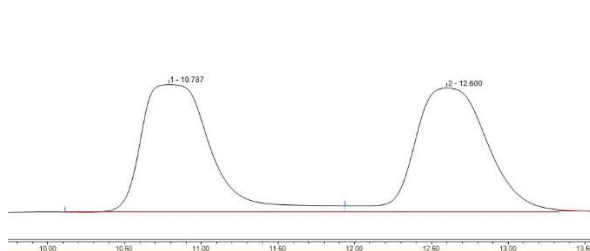

| Ret.Time<br>min | Amount<br>n.a. | Rel.Area<br>% | Area<br>mAU*min | Height<br>mAU |
|-----------------|----------------|---------------|-----------------|---------------|
| 10.787          | n.a.           | 49.91         | 1395.3131       | 2636.63       |
| 12.600          | n.a.           | 50.09         | 1400.0818       | 2562.00       |

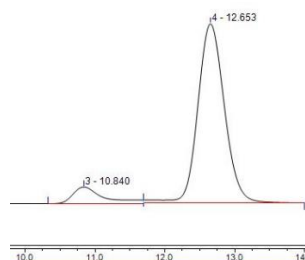

| Ret.Time<br>min | Amount<br>n.a. | Rel.Area<br>% | Area<br>mAU*min | Height<br>mAU |
|-----------------|----------------|---------------|-----------------|---------------|
| 10.840          | n.a.           | 10.63         | 13.5288         | 23.99         |
| 12.653          | n.a.           | 89.37         | 113.7630        | 260.77        |

**Racemization study for 2n:** According to general procedure B, and using the conditions specified immediately above, an analytical quantity of the slower eluting enantiomer was collected by semipreparative HPLC and reinjected successively over time intervals shown below to calculate the rate of racemization.

| Time (s) | % maj. enantiomer | % min. enantiomer | ln(1/ee) |
|----------|-------------------|-------------------|----------|
| 0        | 89.37             | 10.63             | 0.239    |
| 960      | 81.44             | 18.56             | 0.464    |
| 1920     | 72.37             | 27.63             | 0.804    |
| 2880     | 65.98             | 34.02             | 1.14     |

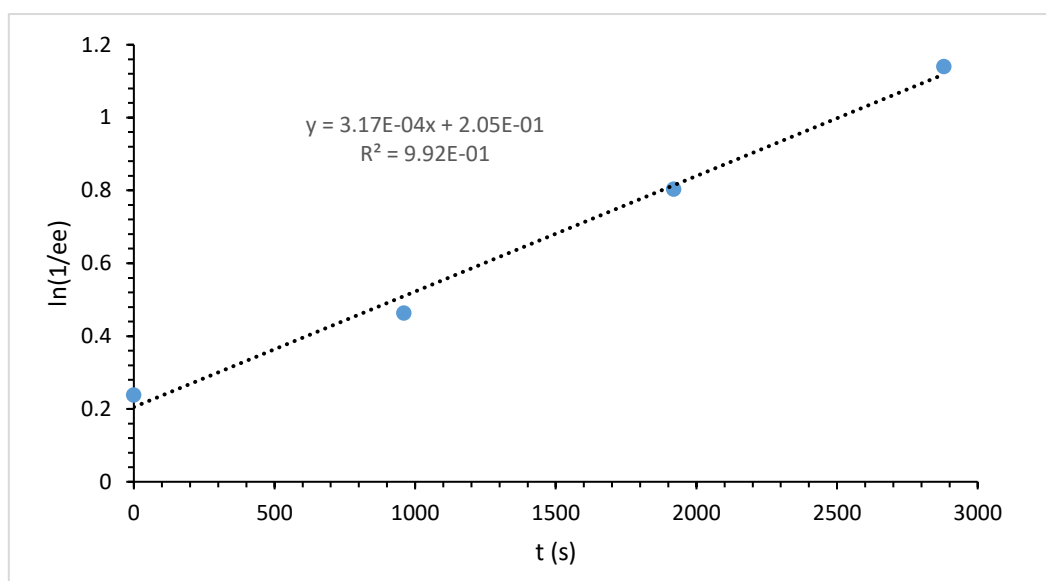

$$k_{rac} = 3.17 \times 10^{-4} \text{ s}^{-1}$$

$$t_{\frac{1}{2}rac} = \mathbf{36 \text{ minutes}}$$

$$\Delta G^\ddagger = \mathbf{93.0 \text{ kJ/mol}}$$

**rac-N-(2-(tert-Butyl)phenyl)-N-chloro-cinnamamide, 2o**

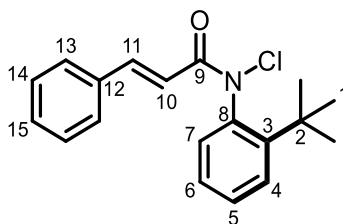

Synthesised from **1o** (206 mg, 0.737 mmol, 1.00 eq.), trichloroisocyanuric acid (189 mg, 0.815 mmol, 1.1 eq.) and CH<sub>2</sub>Cl<sub>2</sub> (7.5 mL) according to the general procedure A. Column chromatography (10% EtOAc/ petrol 40-60) yielded **2o** as a white solid (89 mg, 38% yield).

**<sup>1</sup>H NMR (500 MHz, CDCl<sub>3</sub>, 218 K)** δ<sub>H</sub>: 7.78 (d, *J* = 15.6 Hz, 1H, H<sub>11</sub>), 7.64 – 7.59 (m, 1H, H<sub>7</sub>), 7.52 – 7.47 (m, 1H, H<sub>6</sub>), 7.42 – 7.31 (m, 6H, H<sub>5</sub>, H<sub>13</sub>, H<sub>14</sub>, H<sub>15</sub>), 7.29 – 7.23 (m, 1H, H<sub>4</sub>), 6.15 (d, *J* = 15.6 Hz, 1H, H<sub>10</sub>), 1.44 (s, 9H, H<sub>1</sub>).

**<sup>13</sup>C NMR (126 MHz, CDCl<sub>3</sub>, 218 K)**: δ<sub>C</sub>: δ 166.0, 148.0, 143.9, 140.8, 133.7, 132.2, 130.8, 130.5, 128.9, 128.8, 128.2, 128.2, 115.7, 36.0, 31.4.

**FTIR (neat) v/cm<sup>-1</sup>**: 3001, 2961, 2841, 1901, 1655, 1630, 1594, 1572, 1508.

**HRMS (ESI)**: *m/z* calc'd for C<sub>19</sub>H<sub>21</sub>ClNO<sup>+</sup> [M+H]<sup>+</sup> 314.1306; found 314.1307 Δ= 0.3 ppm.

**Melting point (°C)**: 111-113.

**Chiral HPLC**: Chiralpak-IA column; solvent ratio = 95:5 *n*-hexane: *i*PrOH. Temperature = 25 °C, flow rate = 1 ml/min, λ= 240 nm, τ<sub>ret</sub> = 11.3 min and 13.4 min.

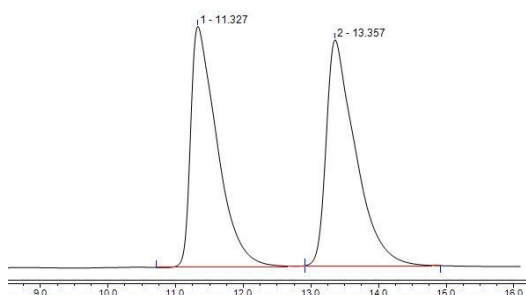

| Ret.Time min | Amount n.a. | Rel.Area % | Area mAU*min | Height mAU |
|--------------|-------------|------------|--------------|------------|
| 11.327       | n.a.        | 48.89      | 681.6093     | 1503.68    |
| 13.357       | n.a.        | 51.11      | 712.6900     | 1413.54    |

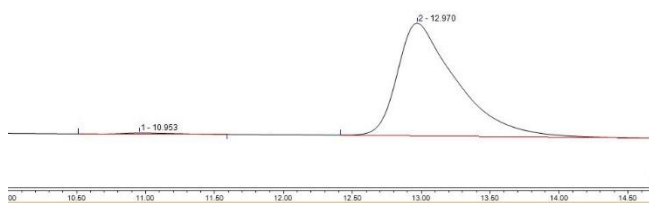

| Ret.Time min | Amount n.a. | Rel.Area % | Area mAU*min | Height mAU |
|--------------|-------------|------------|--------------|------------|
| 10.953       | n.a.        | 0.80       | 0.2936       | 0.76       |
| 12.970       | n.a.        | 99.20      | 36.4381      | 72.85      |



**Racemization study for 2o:** According to general procedure B, and using the conditions specified immediately above, an analytical quantity of the slower eluting enantiomer was collected by semipreparative HPLC and reinjected successively over time intervals shown below to calculate the rate of racemization.

| Time (s) | % maj. enantiomer | % min. enantiomer | ln(1/ee) |
|----------|-------------------|-------------------|----------|
| 0        | 99.20             | 0.80              | 0.0161   |
| 1291     | 99.00             | 1.00              | 0.0202   |
| 13536    | 97.56             | 2.44              | 0.0500   |
| 76693    | 91.02             | 8.98              | 0.198    |
| 166802   | 82.70             | 17.30             | 0.444    |

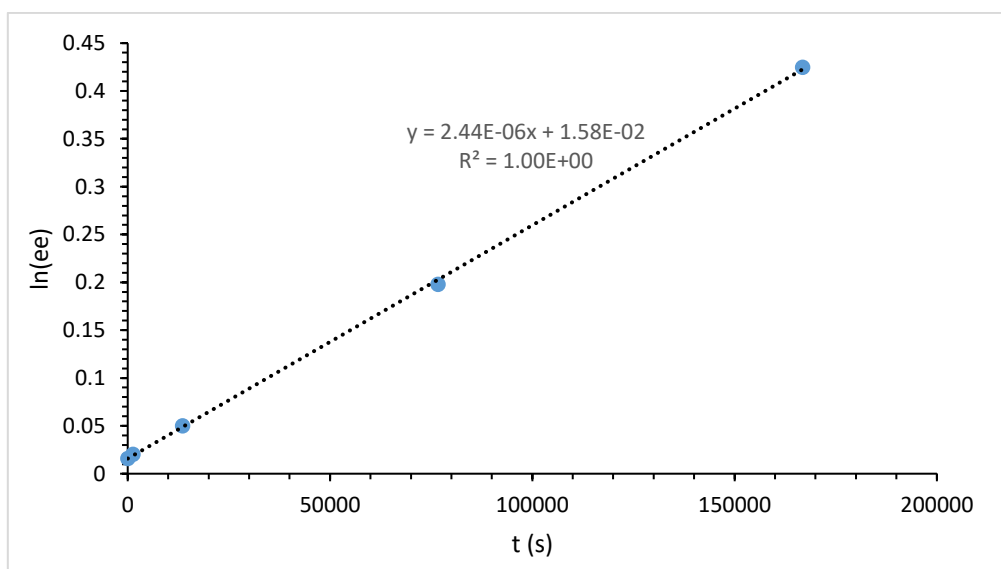

$$k_{rac} = 2.44 \times 10^{-6} \text{ s}^{-1}$$

$$t_{\frac{1}{2}rac} = 3.3 \text{ days}$$

$$\Delta G^\ddagger = 104.9 \text{ kJ/mol}$$

### 3.3 Synthesis of N-alkyl amides

#### *rac*-N-(2-(*tert*-Butyl)phenyl)-3-phenyl-N-propylpropanamide, **3a**

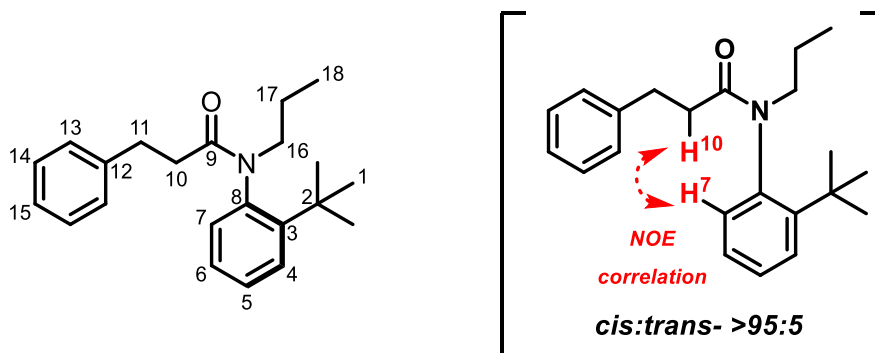

NaH (60% dispersion in mineral oil, 17 mg, 0.43 mmol, 1.2 eq.) was suspended in dry DMF (0.35 mL) and cooled to 0 °C. A solution of **1a** (100 mg, 0.356 mmol, 1.00 eq.) in dry DMF (1.8 mL) was added dropwise and the solution was stirred at 0 °C for 15 minutes. After this time, 1-iodopropane (0.10 mL, 1.0 mmol, 3.0 eq.) was added dropwise and the solution was allowed to warm to room temperature and stirred for 16 hours. The reaction was diluted with water and EtOAc. The layers were separated and the aqueous layer was extracted twice with EtOAc. The combined organics were washed with brine, dried over MgSO<sub>4</sub>, filtered and concentrated *in vacuo*. The crude residue was purified via column chromatography (7% EtOAc/petrol 40-60) to yield **3a** as a white solid (61 mg, 53% yield, >95:5 *cis/trans*).

**<sup>1</sup>H NMR (400 MHz, CDCl<sub>3</sub>)** δ<sub>H</sub> 7.53 (dd, *J* = 8.1, 1.5 Hz, 1H, H<sub>4</sub>), 7.32 – 7.25 (m, 1H, H<sub>6</sub>), 7.25 – 7.20 (m, 2H, H<sub>14</sub>), 7.18 – 7.13 (m, 1H, H<sub>15</sub>), 7.13 – 7.06 (m, 3H, H<sub>13</sub> & H<sub>5</sub>), 6.65 (dd, *J* = 7.7, 1.6 Hz, 1H, H<sub>7</sub>), 4.25 (ddd, *J* = 13.0, 11.1, 5.3 Hz, 1H, H<sub>16</sub>), 2.98 (ddd, *J* = 13.7, 9.3, 6.9 Hz, 1H, H<sub>11</sub>), 2.86 (ddd, *J* = 13.8, 9.0, 6.0 Hz, 1H, H<sub>11'</sub>), 2.68 (ddd, *J* = 13.0, 11.0, 4.8 Hz, 1H, H<sub>16'</sub>), 2.36 – 2.15 (m, 2H, H<sub>10</sub>), 1.85 – 1.68 (m, 1H, H<sub>17</sub>), 1.59 – 1.40 (m, 1H, H<sub>17'</sub>), 1.33 (s, 9H, H<sub>1</sub>), 0.88 (t, *J* = 7.4 Hz, 3H, H<sub>18</sub>).

The identity of the *major* geometrical isomer was assigned as *cis*- on the basis of NOE correlations between H<sub>7</sub>-H<sub>10</sub> (see spectra).

**<sup>13</sup>C NMR (75 MHz, CDCl<sub>3</sub>)**: δ<sub>C</sub>: 172.2, 146.4, 141.6, 140.0, 131.7, 130.3, 128.8, 128.5, 128.4, 126.9, 126.1, 53.0, 37.5, 36.3, 32.3, 31.7, 20.4, 11.6.

**FTIR (neat) ν/cm<sup>-1</sup>**: 2965, 2932, 2874, 1645, 1403, 753, 701, 510.

**HRMS (ESI)**: *m/z* calc'd for C<sub>22</sub>H<sub>30</sub>NO<sup>+</sup>[M+H]<sup>+</sup> 324.2322; found 324.2327 Δ= 1.5 ppm.

**Melting Point (°C)**: 82-84.

**Chiral HPLC:** Chiralpak-IB column; solvent ratio = 97:3 *n*-hexane: *i*-PrOH. Temperature = 25 °C, flow rate = 1 ml/min,  $\lambda$  = 240 nm,  $\tau_{\text{ret}}$  = 6.00 min and 6.40 min.

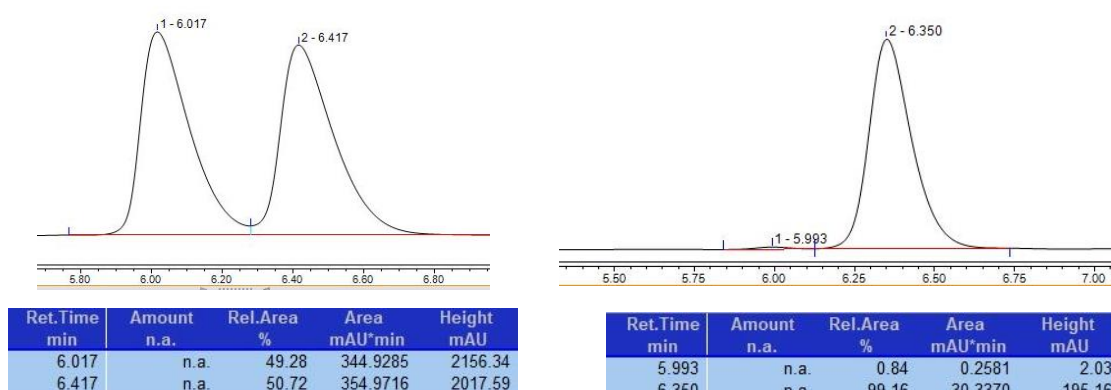

**Racemization study for 3a:** According to a modification of general procedure B, *rac*-**3a** (1 mg) was dissolved in 2 mL HPLC grade *n*-hexane. The sample was subjected to semi-preparative normal-phase HPLC (100  $\mu$ L injection volume) under the conditions specified immediately above using an analytical Daicel IB column (dimensions: 0.46 cm  $\phi$  x 25 cm) along with the corresponding guard column (0.4 cm  $\phi$  x 1 cm) and the slower eluting enantiomer was collected. The solvent was removed under a stream of nitrogen and the residue was redissolved in isooctane. The sample was heated to 100 °C in a preheated oil bath, and 100  $\mu$ L aliquots were removed and analyzed by chiral HPLC (under identical conditions) at the time intervals shown below to calculate the rate of racemization.

| Time (s) | % maj. enantiomer | % min. enantiomer | ln(1/ee) |
|----------|-------------------|-------------------|----------|
| 0        | 99.16             | 0.84              | 0.0169   |
| 3540     | 97.09             | 2.91              | 0.0600   |
| 6300     | 95.47             | 4.53              | 0.0950   |
| 10560    | 93.09             | 6.91              | 0.149    |
| 14160    | 91.20             | 8.80              | 0.194    |

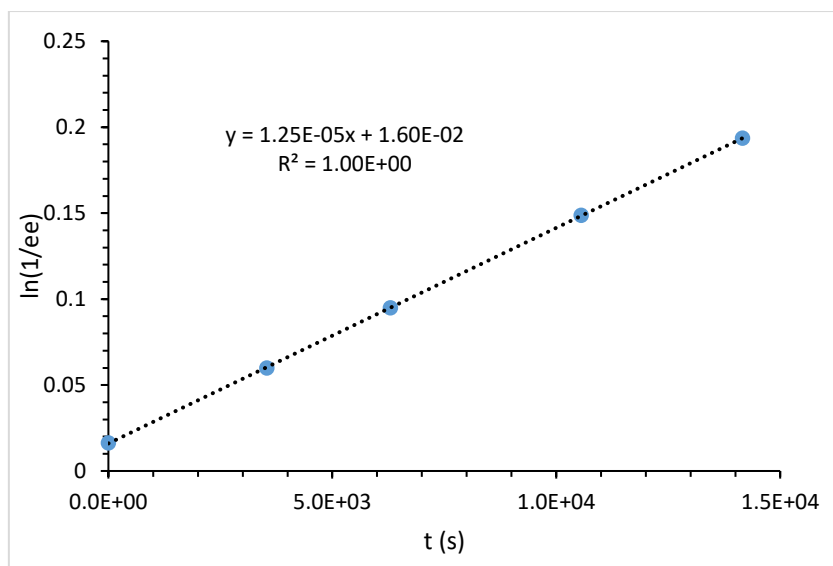

$$k_{rac} = 1.25 \times 10^{-5} \text{ s}^{-1} (100 \text{ } ^\circ\text{C})$$

$$t_{\frac{1}{2}rac} = 15.4 \text{ hours (100 } ^\circ\text{C)}$$

$$\Delta G^\ddagger = 129.2 \text{ kJ/mol (100 } ^\circ\text{C)}$$

Assuming  $\Delta G^\ddagger$  is invariant with temperature,  $t_{\frac{1}{2}rac} \approx 200 \text{ years (20 } ^\circ\text{C)}$

#### **rac-N-(2-(tert-Butyl)phenyl)-N-propylbenzamide, 3b**

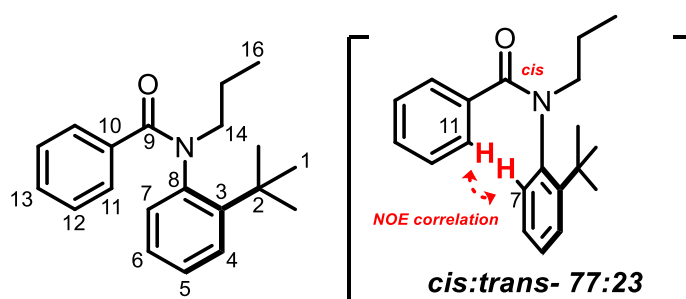

A suspension of sodium hydride (60% dispersion in mineral oil, 47 mg, 1.2 mmol, 1.2 eq.) in dry DMF (1.3 mL) was cooled to 0 °C and a solution of **1i** (250 mg, 0.987 mmol, 1.0 eq.) in DMF (4.2 mL) was added. The mixture was stirred for 15 minutes at 0 °C. Propyl iodide (0.3 mL, 3.0 mmol, 3.0 eq.) was added dropwise and the mixture was warmed to room temperature and stirred for 2 h. After this time, water and EtOAc were added, the layers separated, and the aqueous layer extracted twice with EtOAc. The combined organic extracts were dried over MgSO<sub>4</sub>, filtered, and concentrated under reduced pressure. The crude product was purified by column chromatography (eluent: gradient from 5% Et<sub>2</sub>O in petrol 40-60 to 100% Et<sub>2</sub>O) to afford **3b** as a white solid (79 mg, 27% yield).

**<sup>1</sup>H NMR (700 MHz, CDCl<sub>3</sub>)**  $\delta$ <sub>H</sub>: 7.62 – 7.57 (m, 3H, H<sub>4min.</sub> and H<sub>11min.</sub>), 7.51 – 7.44 (m, 4H, H<sub>4maj.</sub>, H<sub>13min.</sub> and H<sub>12min.</sub>), 7.35 – 7.34 (m, 1H, H<sub>5min.</sub>), 7.33 – 7.31 (m, 2H, H<sub>11maj.</sub>), 7.31 – 7.28 (m, 1H, H<sub>6min.</sub>), 7.27 – 7.24 (m, 1H, H<sub>5maj.</sub>), 7.23

– 7.19 (m, 1H, H<sub>13maj.</sub>), 7.17 (dd, J = 7.7, 1.6 Hz, 1H, H<sub>7min.</sub>), 7.15 – 7.12 (m, 2H, H<sub>12maj.</sub>), 7.12 – 7.09 (m, 1H, H<sub>6maj.</sub>), 7.01 (dd, J = 7.8, 1.5 Hz, 1H, H<sub>7maj.</sub>), 4.44 (ddd, J = 13.0, 11.1, 5.3 Hz, 1H, H<sub>14maj.</sub>), 3.77 (ddd, J = 14.4, 11.3, 5.3 Hz, 1H, H<sub>14min.</sub>), 3.17 (ddd, J = 14.4, 11.2, 4.8 Hz, 1H, H<sub>14'min.</sub>), 2.93 (ddd, J = 13.0, 11.1, 4.8 Hz, 1H, H<sub>14'maj.</sub>), 2.16 – 1.89 (m, 1H, H<sub>15maj.</sub>), 1.76 – 1.63 (m, 2H, H<sub>15'maj.</sub> and H<sub>15min.</sub>), 1.51 (s, 10H, H<sub>1min.</sub> and H<sub>15min.</sub>), 1.33 (s, 9H, H<sub>1maj.</sub>), 0.98 (t, J = 7.4 Hz, 3H, H<sub>16maj.</sub>), 0.66 (t, J = 7.4 Hz, 3H, H<sub>16min.</sub>).

The identity of the *major* geometrical isomer was assigned as *cis*- on the basis of NOE correlations between H<sub>11</sub> and H<sub>7</sub> (see spectra). A ratio of 77:23 *cis/trans* was measured from the <sup>1</sup>H NMR data collected at 218 K.

**<sup>13</sup>C NMR (176 MHz, CDCl<sub>3</sub>)** δ<sub>c</sub> = 172.3 (min.), 168.8 (maj.), 146.5 (min.), 146.1 (maj.), 140.1 (maj.), 139.9 (min.), 137.1 (min.), 136.2 (maj.), 132.5 (maj.), 131.9 (min.), 130.8 (maj.), 129.5 (min.), 129.4 (maj.), 129.3 (min.), 129.1 (maj.), 128.5 (min.), 128.1 (maj.), 128.0 (min.), 127.4 (maj.), 126.8 (min.), 126.5 (min.), 126.2 (maj.), 55.9 (min.), 54.8 (maj.), 36.3 (maj.), 36.1 (min.), 32.3 (maj.), 31.9 (min.), 22.4 (min.), 20.2 (maj.), 11.6 (maj.), 11.2 (min.)

**FTIR (neat) v/cm<sup>-1</sup>:** 3060, 2951, 2925, 2867, 1626, 1593, 1489, 1403, 1319, 774, 658, 609.

**HRMS (ESI):** m/z calc'd for C<sub>20</sub>H<sub>26</sub>NO<sup>+</sup> [M+H]<sup>+</sup> 296.2009; found 296.2027 Δ 6.1 ppm.

**Melting Point (°C):** 92-96.

**Chiral HPLC:** Chiralpak-IC column; solvent ratio = 92:8 *n*-hexane: *i*-PrOH. Temperature = 25 °C, flow rate = 1 ml/min, λ = 254 nm, τ<sub>ret</sub> = 15.9 min and 20.5 min.

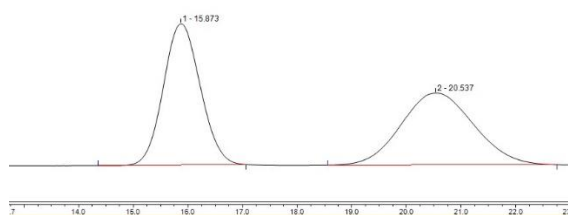

| Ret. Time<br>min | Amount<br>n.a. | Rel. Area<br>% | Area<br>mAU*min | Height<br>mAU |
|------------------|----------------|----------------|-----------------|---------------|
| 15.873           | n.a.           | 49.91          | 768.4869        | 980.87        |
| 20.537           | n.a.           | 50.09          | 771.1462        | 499.23        |

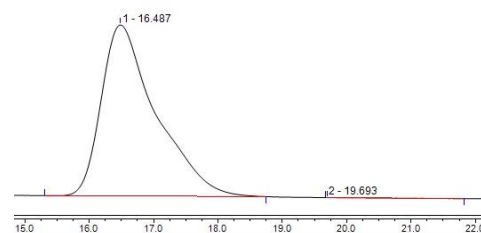

| Ret. Time<br>min | Amount<br>n.a. | Rel. Area<br>% | Area<br>mAU*min | Height<br>mAU |
|------------------|----------------|----------------|-----------------|---------------|
| 16.487           | n.a.           | 99.99          | 179.9279        | 183.01        |
| 19.693           | n.a.           | 0.01           | 0.0117          | 0.01          |

**Racemization study for 3b:** According to a modification of general procedure B, *rac-3b* (1 mg) was dissolved in 2 mL HPLC grade *n*-hexane. The sample was subjected to semi-preparative normal-phase HPLC (100  $\mu$ L injection volume) under the conditions specified immediately above using an analytical Daicel IC column (dimensions: 0.46 cm  $\phi$  x 25 cm) along with the corresponding guard column (0.4 cm  $\phi$  x 1 cm). The slower eluting enantiomer was collected. The solvent was removed under a stream of nitrogen and the residue was redissolved in isooctane. The sample was heated to 70  $^{\circ}$ C in a preheated oil bath, and 100  $\mu$ L aliquots were removed and analyzed by chiral HPLC (under identical conditions) at the time intervals shown below to calculate the rate of racemization.

| Time (s) | % maj. enantiomer | % min. enantiomer | ln(1/ee) |
|----------|-------------------|-------------------|----------|
| 0        | 99.99             | 0.01              | 0.0002   |
| 1980     | 87.67             | 12.33             | 0.283    |
| 3900     | 79.06             | 20.94             | 0.543    |
| 5760     | 72.17             | 27.83             | 0.813    |
| 8400     | 64.29             | 35.71             | 1.25     |

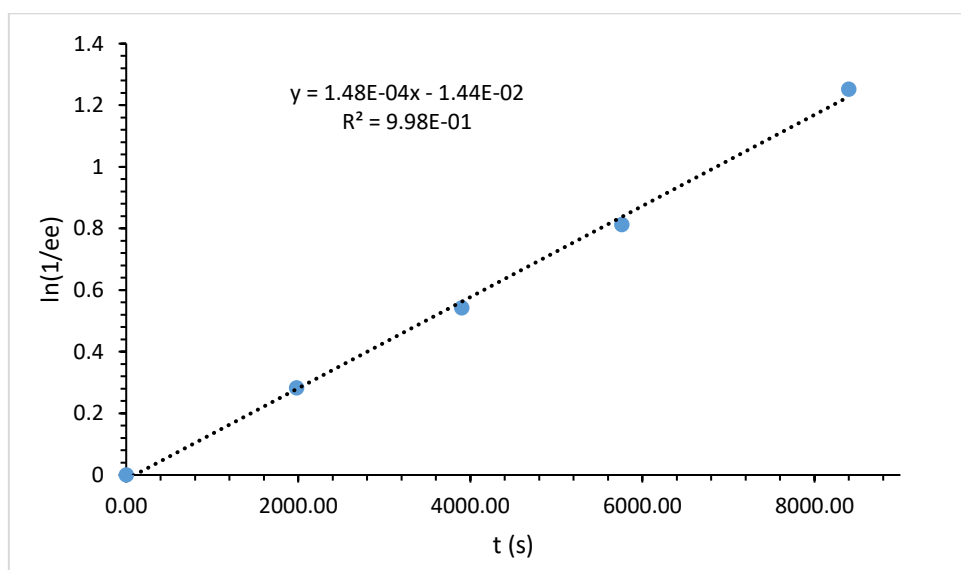

$$k_{rac} = 1.48 \times 10^{-4} \text{ s}^{-1} (70 \text{ }^{\circ}\text{C})$$

$$t_{\frac{1}{2}}^{rac} = 1.3 \text{ h} (70 \text{ }^{\circ}\text{C})$$

$$\Delta G^{\ddagger} = 111.5 \text{ kJ/mol} (70 \text{ }^{\circ}\text{C})$$

Assuming  $\Delta G^{\ddagger}$  is invariant with temperature,  $t_{\frac{1}{2}}^{rac} \approx 60 \text{ days} (20 \text{ }^{\circ}\text{C})$

### 3.4 Correlation of Racemization Rates with Charton Parameters and $\theta$

The table below summarises the experimentally determined values of  $\Delta G^\ddagger$  for compounds **2a-g** and **2l-n** along with Charton values ( $\nu$ ) reported in the literature,<sup>7,8,9</sup> Taft-Dubois steric parameter ( $E_s'$ ) reported in the literature,<sup>10</sup> and angle parameters  $\theta$  calculated from the X-ray crystal structures. Uncertainties in  $\theta$  were estimated by propagating individual standard deviations of angles  $a$ ,  $b$  and  $c$  obtained from analysis of X-ray diffraction data. Uncertainties in  $\Delta G^\ddagger$  were estimated by propagating standard errors in  $k_{rac}$  obtained via linear regression analysis.

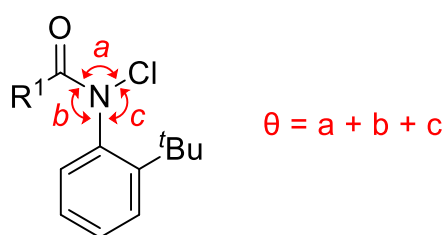

| Compound<br>[R <sup>1</sup> ]                                         | angle $a$ / °<br>(CO-N-Cl) | angle $b$ / °<br>(CO-N-Ar) | angle $c$ / °<br>(Ar-N-Cl) | $\theta$ / °<br>( $a+b+c$ ) | $\nu$                     | $-E_s'$            | $\Delta G^\ddagger$ /<br>kJ/mol |
|-----------------------------------------------------------------------|----------------------------|----------------------------|----------------------------|-----------------------------|---------------------------|--------------------|---------------------------------|
| <b>2a</b> [PhCH <sub>2</sub> CH <sub>2</sub> ]                        | 116.63                     | 127.11                     | 112.88                     | 356.62 ± 0.23               | 0.70 <sup>7</sup>         | 0.35 <sup>10</sup> | 108.03 ± 0.02                   |
| <b>2b</b> [Et]                                                        | 115.43                     | 124.39                     | 113.64                     | 353.46 ± 0.15               | 0.56 <sup>7</sup>         | 0.08 <sup>10</sup> | 107.92 ± 0.13                   |
| <b>2c</b> [ <sup>n</sup> Hept]                                        | –                          | –                          | –                          | –                           | 0.73 <sup>8</sup>         | –                  | 108.01 ± 0.13                   |
| <b>2d</b> [ <sup>c</sup> Pr]                                          | 114.12                     | 123.90                     | 111.84                     | 349.86 ± 0.31               | 1.06 <sup>8</sup>         | 1.09 <sup>10</sup> | 106.40 ± 0.03                   |
| <b>2e</b> [ <sup>c</sup> Bu]                                          | 115.43                     | 125.11                     | 113.72                     | 354.26 ± 0.16               | 0.51 <sup>8</sup>         | 0.03 <sup>10</sup> | 107.66 ± 0.004                  |
| <b>2f</b> [ <sup>c</sup> Pent]                                        | 114.12                     | 123.88                     | 112.26                     | 350.26 ± 0.25               | 0.71 <sup>8</sup>         | 0.41 <sup>10</sup> | 107.10 ± 0.09                   |
| <b>2g</b> [ <sup>c</sup> Hex]                                         | 113.61                     | 121.01                     | 111.44                     | 346.06 ± 0.17               | 0.87 <sup>8</sup>         | 0.69 <sup>10</sup> | 105.18 ± 0.02                   |
| <b>2l</b> [Ph]                                                        | 117.33                     | 118.06                     | 114.06                     | 349.45 ± 0.23               | 0.57 or 1.66 <sup>9</sup> | 2.31 <sup>10</sup> | 94.17 ± 0.03<br>94.21 ± 0.01    |
| <b>2m</b> [ <i>p</i> -CF <sub>3</sub> C <sub>6</sub> H <sub>4</sub> ] | 117.92                     | 120.50                     | 112.99                     | 351.41 ± 0.18               | –                         | –                  | 95.39 ± 0.10                    |
| <b>2n</b> [ <i>p</i> -OMeC <sub>6</sub> H <sub>4</sub> ]              | 116.57                     | 119.15                     | 112.22                     | 347.94 ± 0.20               | –                         | –                  | 93.03 ± 0.16                    |

Plotting the values for Charton parameter against  $\Delta G^\ddagger$  gave the following graph. Error bars represent uncertainties in  $\Delta G^\ddagger$  as described above.

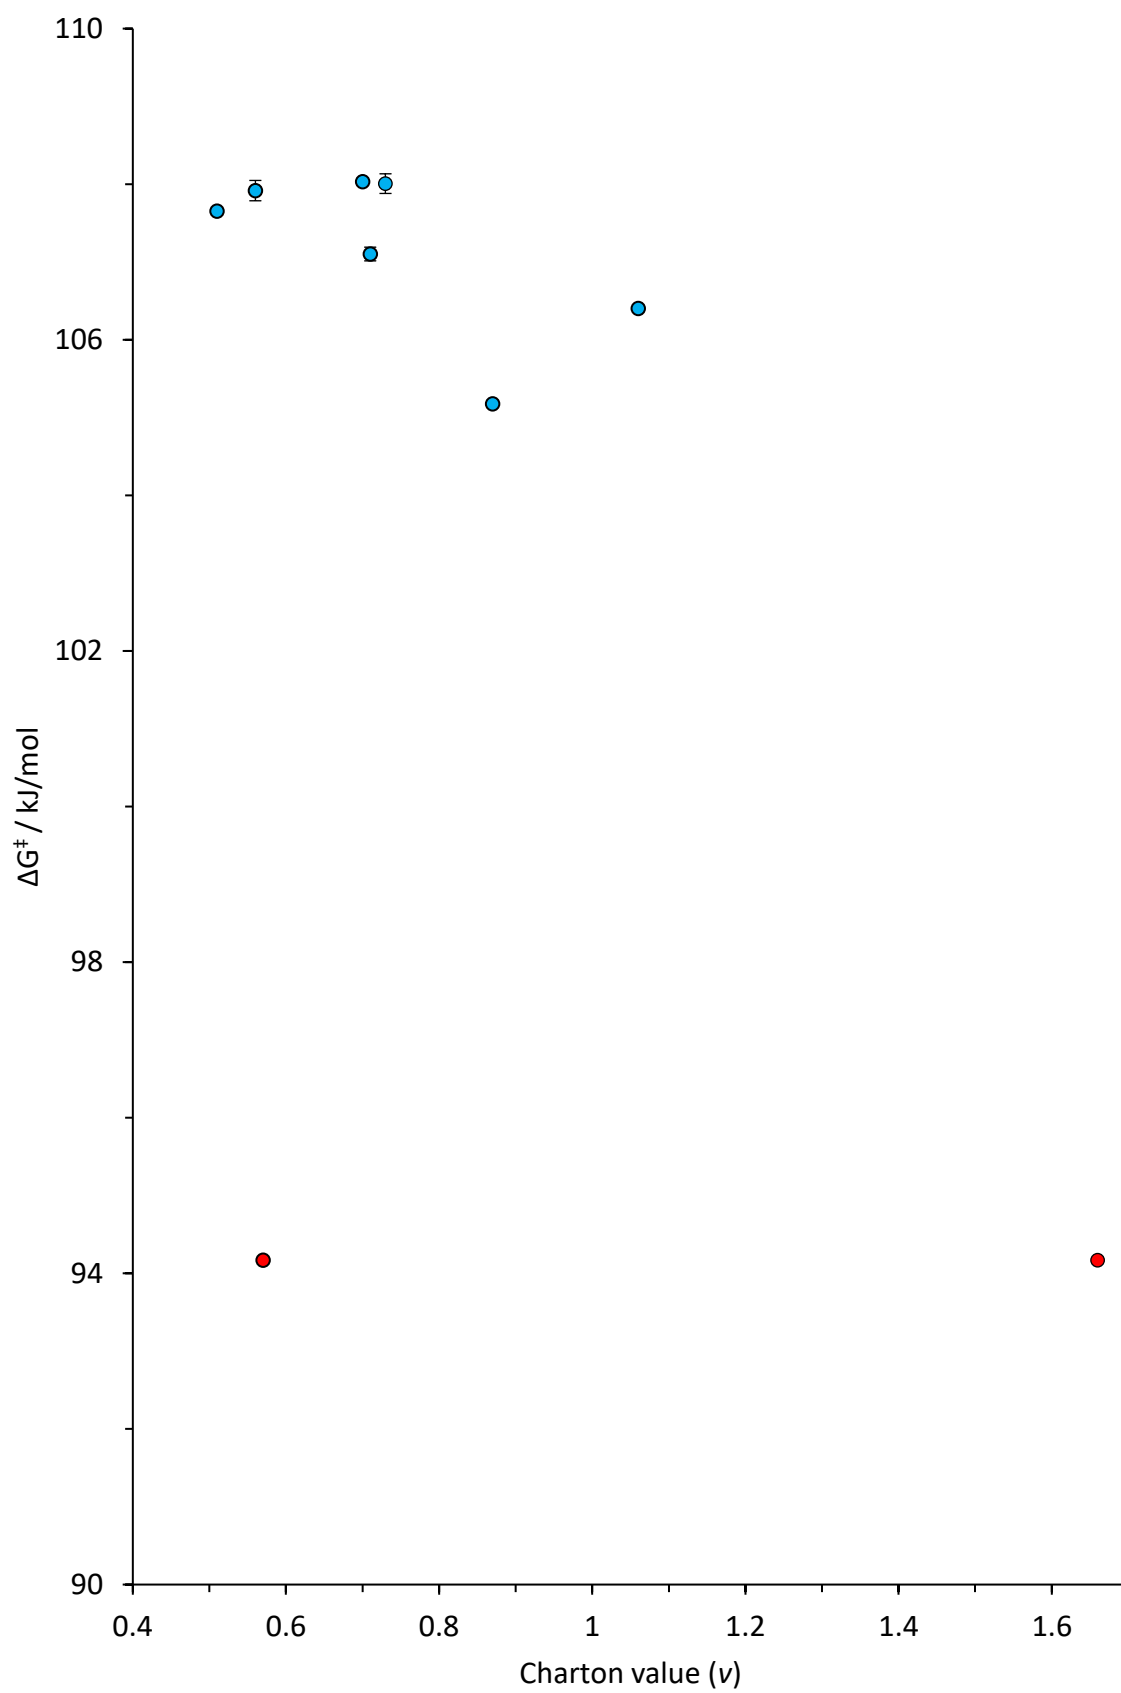



Plotting the values for the Taft-Dubois steric parameter against  $\Delta G^\ddagger$  gave the following graph. Error bars represent uncertainties in  $\Delta G^\ddagger$  as described above.

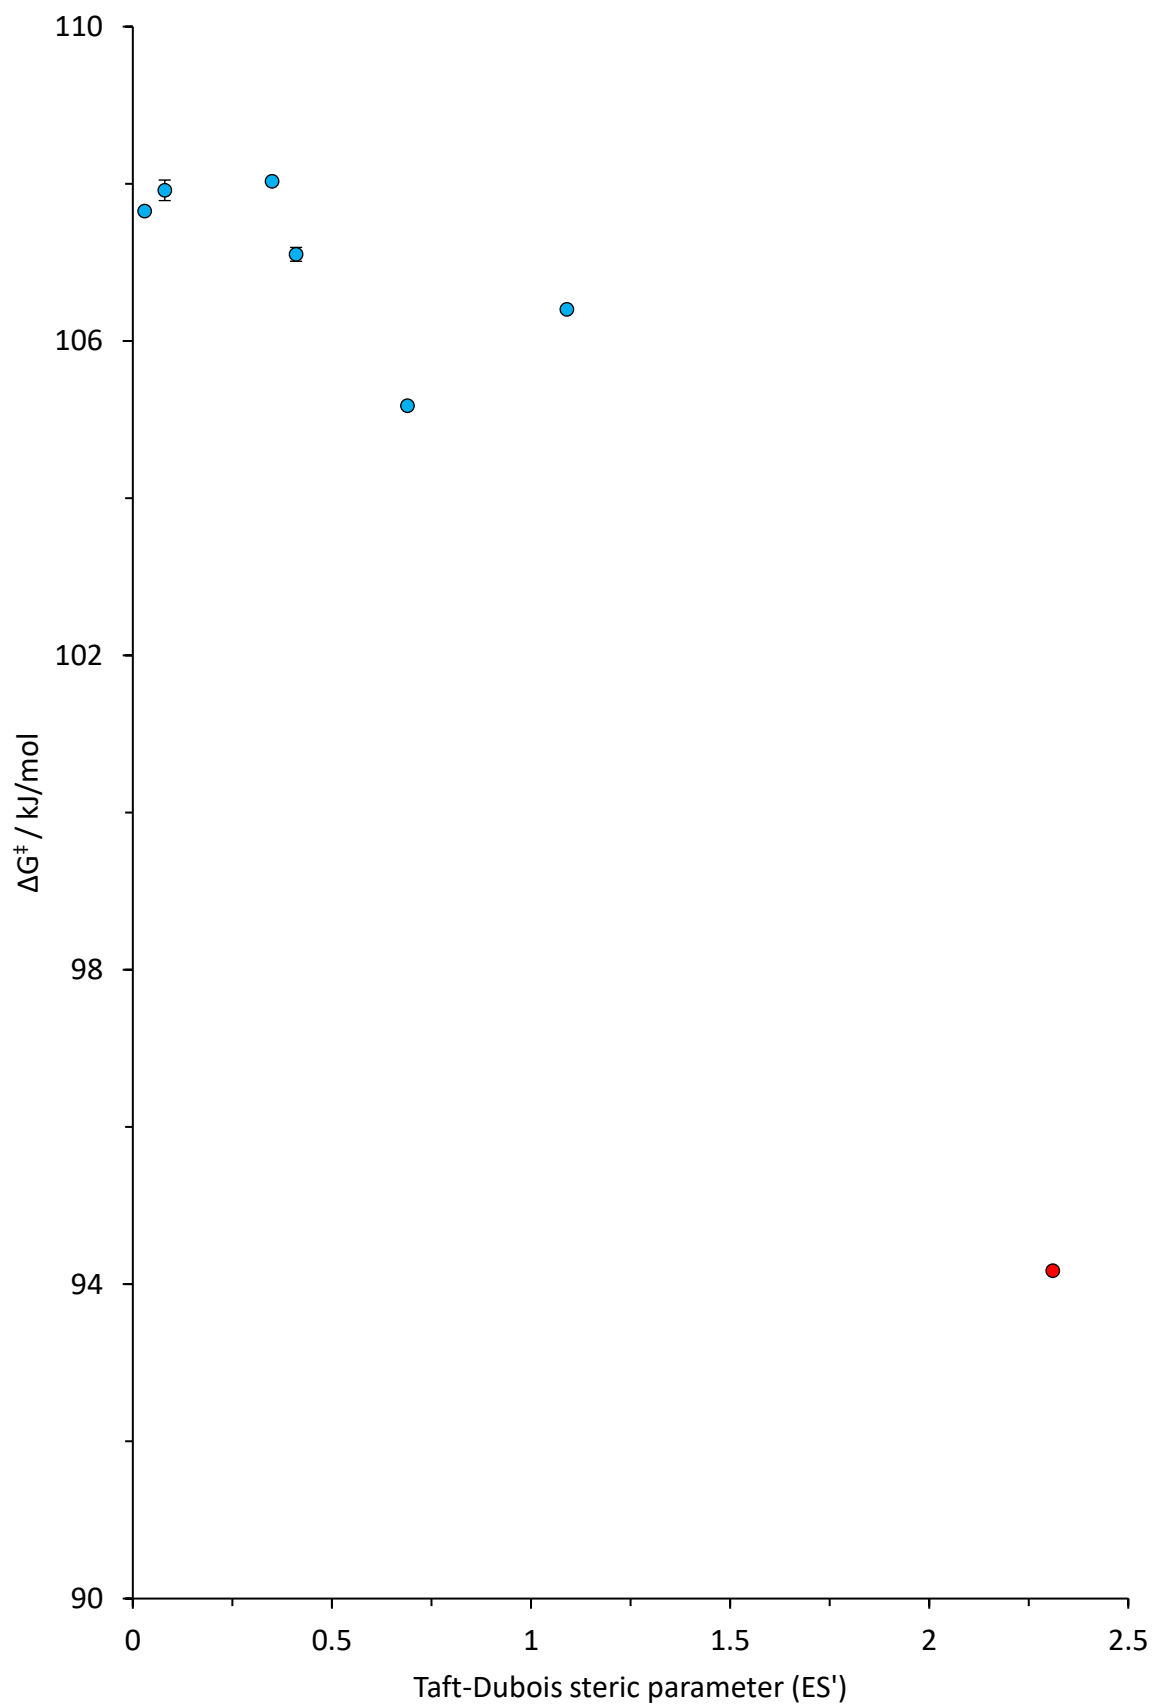

Plotting the values for  $\theta$  against  $\Delta G^\ddagger$  gave the following graph. Error bars represent uncertainties in  $\theta$  and  $\Delta G^\ddagger$  as described above.

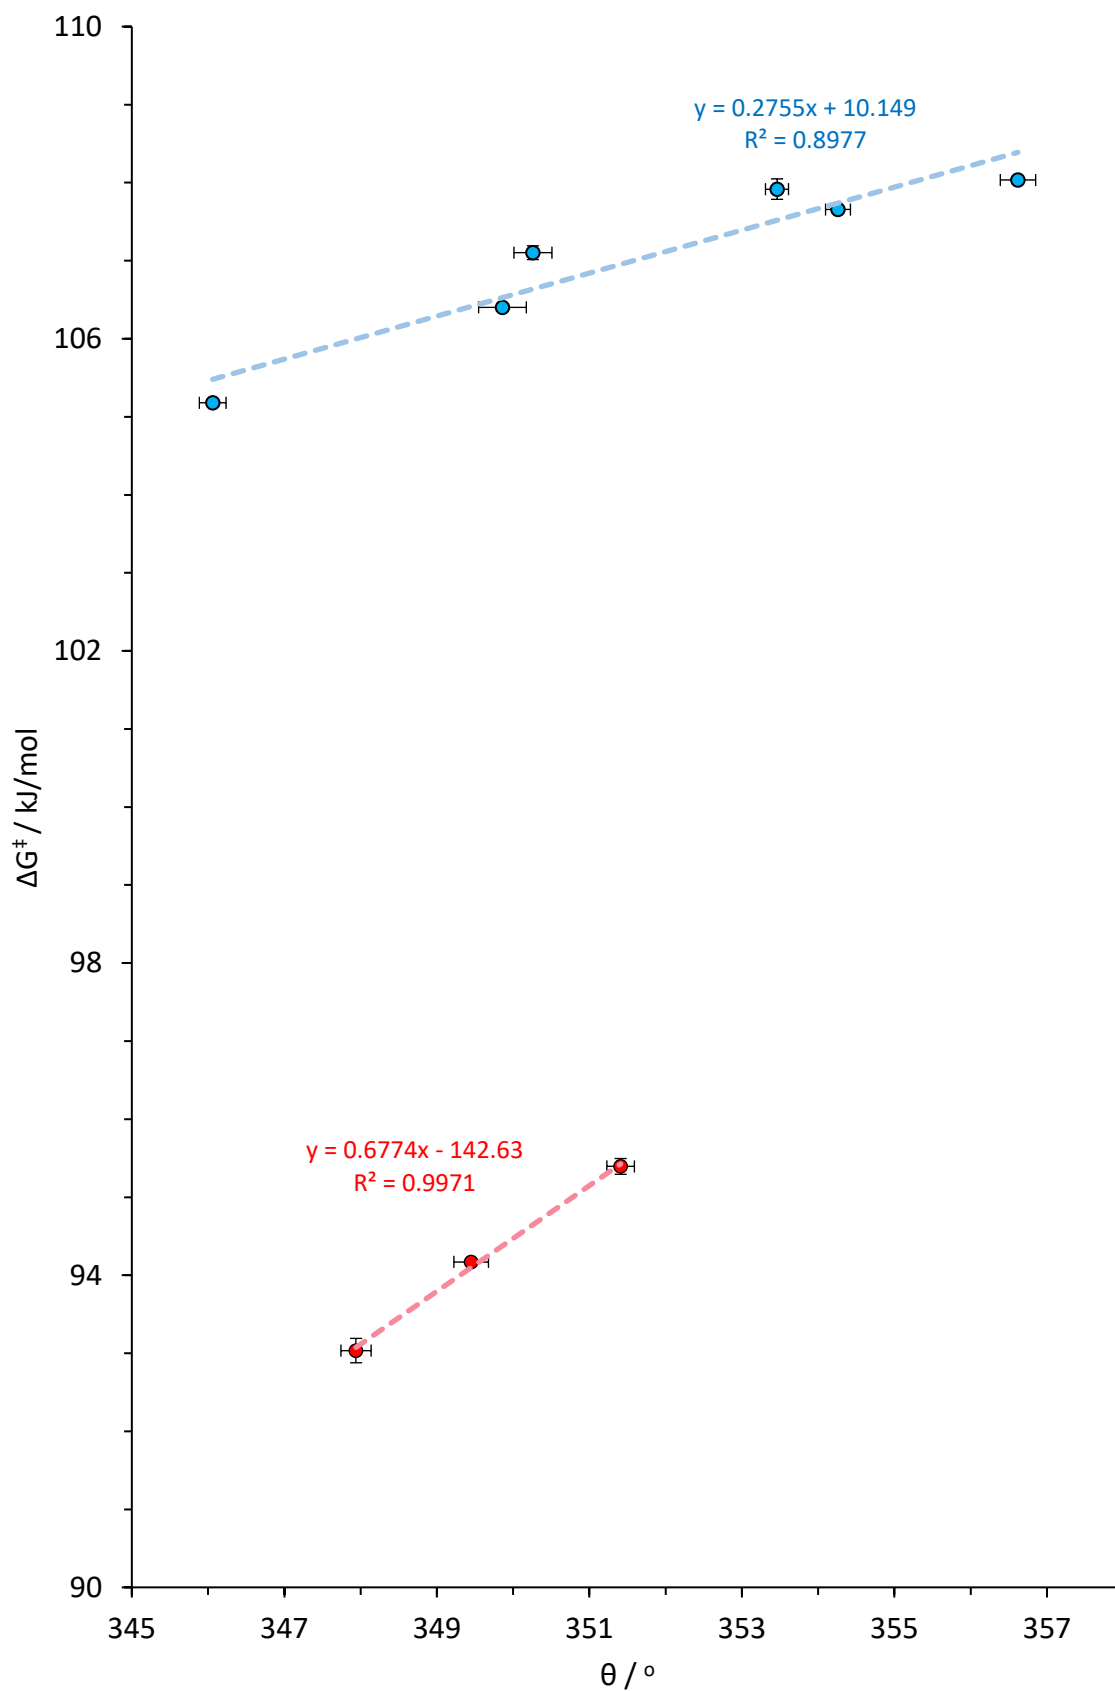

## 4. X-Ray Crystallography

### 4.1 Experimental

Single crystal diffraction data were collected on a XtaLAB Synergy HyPix-Arc 100 diffractometer using copper radiation ( $\lambda_{\text{CuK}\alpha} = 1.54184 \text{ \AA}$ ). Data were collected at 150 K using an Oxford Cryosystems CryostreamPlus open-flow  $\text{N}_2$  cooling device.

Intensities were corrected for absorption using a multifaceted crystal model created by indexing the faces of the crystal for which data were collected.<sup>11</sup> Cell refinement, data collection and data reduction were undertaken via the software CrysAlisPro.<sup>12</sup>

All structures were solved using XT<sup>13</sup> and refined by XL<sup>14</sup> using the Olex2 interface.<sup>15</sup> All non-hydrogen atoms were refined anisotropically and hydrogen atoms were positioned with idealised geometry, with the exception of those bound to heteroatoms, the positions of which were located using peaks in the Fourier difference map. The displacement parameters of the hydrogen atoms were constrained using a riding model with  $U_{(\text{H})}$  set to be an appropriate multiple of the  $U_{\text{eq}}$  value of the parent atom.

### 4.2 Crystal data and structure refinement for 2a

|                                                |                                                               |
|------------------------------------------------|---------------------------------------------------------------|
| Empirical formula                              | $\text{C}_{19}\text{H}_{22}\text{ClNO}$                       |
| Formula weight                                 | 315.82                                                        |
| Temperature/K                                  | 150.0(2)                                                      |
| Crystal system                                 | monoclinic                                                    |
| Space group                                    | $P2_1/n$                                                      |
| $a/\text{\AA}$                                 | 16.7373(9)                                                    |
| $b/\text{\AA}$                                 | 6.1891(2)                                                     |
| $c/\text{\AA}$                                 | 18.0916(11)                                                   |
| $\alpha/^\circ$                                | 90                                                            |
| $\beta/^\circ$                                 | 110.509(6)                                                    |
| $\gamma/^\circ$                                | 90                                                            |
| Volume/ $\text{\AA}^3$                         | 1755.30(17)                                                   |
| Z                                              | 4                                                             |
| $\rho_{\text{calc}}/\text{cm}^3$               | 1.195                                                         |
| $\mu/\text{mm}^{-1}$                           | 1.923                                                         |
| F(000)                                         | 672.0                                                         |
| Crystal size/ $\text{mm}^3$                    | $0.26 \times 0.06 \times 0.05$                                |
| Radiation                                      | $\text{Cu K}\alpha$ ( $\lambda = 1.54184$ )                   |
| 2 $\theta$ range for data collection/ $^\circ$ | 8.926 to 155.896                                              |
| Index ranges                                   | $-20 \leq h \leq 21, -7 \leq k \leq 7, -21 \leq l \leq 22$    |
| Reflections collected                          | 20357                                                         |
| Independent reflections                        | 3493 [ $R_{\text{int}} = 0.0320, R_{\text{sigma}} = 0.0217$ ] |

Data/restraints/parameters 3493/234/233  
 Goodness-of-fit on  $F^2$  1.148  
 Final R indexes [ $I \geq 2\sigma(I)$ ]  $R_1 = 0.0428$ ,  $wR_2 = 0.1167$   
 Final R indexes [all data]  $R_1 = 0.0509$ ,  $wR_2 = 0.1354$   
 Largest diff. peak/hole /  $e \text{ \AA}^{-3}$  0.31/-0.44

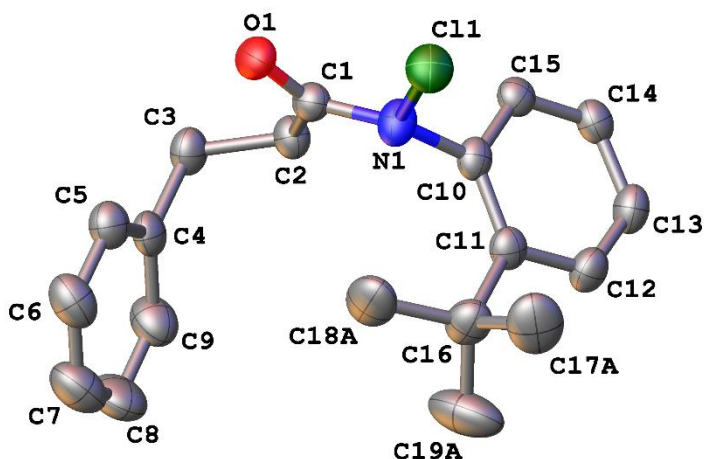

Figure 1: The structure of **2a** with probability ellipsoids drawn at the 50% probability level. Only the disorder component with the highest occupancy is shown and hydrogen atoms have been omitted for clarity

### 4.3 Crystal data and structure refinement for **2b**

|                                               |                                                                  |
|-----------------------------------------------|------------------------------------------------------------------|
| Empirical formula                             | $C_{13}H_{18}ClNO$                                               |
| Formula weight                                | 239.746                                                          |
| Temperature/K                                 | 150.0(2)                                                         |
| Crystal system                                | triclinic                                                        |
| Space group                                   | P-1                                                              |
| $a/\text{\AA}$                                | 6.66649(19)                                                      |
| $b/\text{\AA}$                                | 9.4285(3)                                                        |
| $c/\text{\AA}$                                | 10.2117(3)                                                       |
| $\alpha/^\circ$                               | 93.580(2)                                                        |
| $\beta/^\circ$                                | 96.362(2)                                                        |
| $\gamma/^\circ$                               | 93.083(2)                                                        |
| Volume/ $\text{\AA}^3$                        | 635.47(3)                                                        |
| Z                                             | 2                                                                |
| $\rho_{\text{calc}}/\text{g/cm}^3$            | 1.253                                                            |
| $\mu/\text{mm}^{-1}$                          | 2.486                                                            |
| $F(000)$                                      | 257.4                                                            |
| Crystal size/ $\text{mm}^3$                   | 0.19 $\times$ 0.18 $\times$ 0.06                                 |
| Radiation                                     | Cu $K\alpha$ ( $\lambda = 1.54184$ )                             |
| $2\theta$ range for data collection/ $^\circ$ | 8.74 to 155.2                                                    |
| Index ranges                                  | $-8 \leq h \leq 8$ , $-11 \leq k \leq 11$ , $-12 \leq l \leq 12$ |
| Reflections collected                         | 13900                                                            |
| Independent reflections                       | 2505 [ $R_{\text{int}} = 0.0347$ , $R_{\text{sigma}} = 0.0219$ ] |



Final R indexes [ $I \geq 2\sigma(I)$ ]  $R_1 = 0.0607$ ,  $wR_2 = 0.1564$   
 Final R indexes [all data]  $R_1 = 0.0668$ ,  $wR_2 = 0.1619$   
 Largest diff. peak/hole /  $e \text{ \AA}^{-3}$  1.65/-0.78

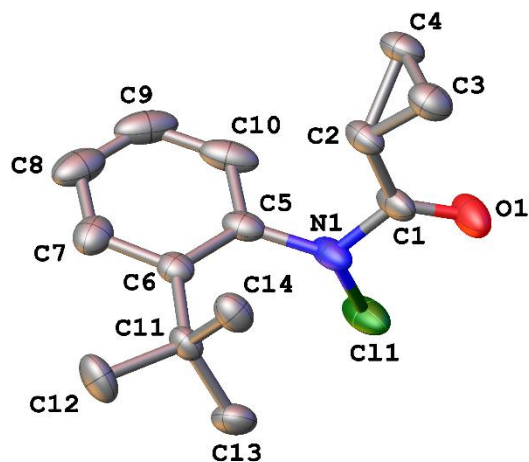

Figure 3: The structure of **2d** with probability ellipsoids drawn at the 50% probability level. Hydrogen atoms have been omitted for clarity

#### 4.5 Crystal data and structure refinement for **2e**

|                                               |                                                                  |
|-----------------------------------------------|------------------------------------------------------------------|
| Empirical formula                             | $C_{15}H_{20}ClNO$                                               |
| Formula weight                                | 265.77                                                           |
| Temperature/K                                 | 150.0(2)                                                         |
| Crystal system                                | monoclinic                                                       |
| Space group                                   | $C2/c$                                                           |
| $a/\text{\AA}$                                | 17.0047(5)                                                       |
| $b/\text{\AA}$                                | 6.6560(2)                                                        |
| $c/\text{\AA}$                                | 24.7570(8)                                                       |
| $\alpha/^\circ$                               | 90                                                               |
| $\beta/^\circ$                                | 92.075(3)                                                        |
| $\gamma/^\circ$                               | 90                                                               |
| Volume/ $\text{\AA}^3$                        | 2800.24(15)                                                      |
| Z                                             | 8                                                                |
| $\rho_{\text{calc}}/\text{g/cm}^3$            | 1.261                                                            |
| $\mu/\text{mm}^{-1}$                          | 2.308                                                            |
| $F(000)$                                      | 1136.0                                                           |
| Crystal size/ $\text{mm}^3$                   | 0.19 × 0.16 × 0.1                                                |
| Radiation                                     | Cu $K\alpha$ ( $\lambda = 1.54184$ )                             |
| $2\theta$ range for data collection/ $^\circ$ | 7.146 to 156.44                                                  |
| Index ranges                                  | $-20 \leq h \leq 19$ , $-8 \leq k \leq 8$ , $-30 \leq l \leq 30$ |
| Reflections collected                         | 12518                                                            |
| Independent reflections                       | 2785 [ $R_{\text{int}} = 0.0331$ , $R_{\text{sigma}} = 0.0243$ ] |
| Data/restraints/parameters                    | 2785/0/166                                                       |
| Goodness-of-fit on $F^2$                      | 1.066                                                            |

Final R indexes [ $I \geq 2\sigma(I)$ ]  $R_1 = 0.0330$ ,  $wR_2 = 0.0886$   
 Final R indexes [all data]  $R_1 = 0.0372$ ,  $wR_2 = 0.0928$   
 Largest diff. peak/hole /  $e \text{ \AA}^{-3}$  0.22/-0.27

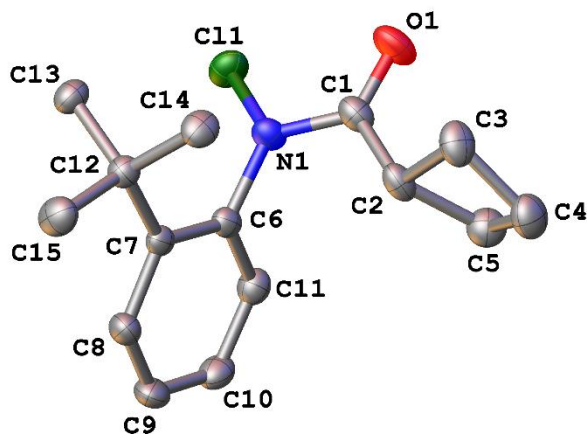

Figure 4: The structure of **2e** with probability ellipsoids drawn at the 50% probability level. Hydrogen atoms have been omitted for clarity

#### 4.6 Crystal data and structure refinement for **2f**

|                                               |                                                                  |
|-----------------------------------------------|------------------------------------------------------------------|
| Empirical formula                             | $C_{16}H_{22}ClNO$                                               |
| Formula weight                                | 279.79                                                           |
| Temperature/K                                 | 150.0(2)                                                         |
| Crystal system                                | monoclinic                                                       |
| Space group                                   | $P2_1/c$                                                         |
| $a/\text{\AA}$                                | 12.6132(6)                                                       |
| $b/\text{\AA}$                                | 6.8258(4)                                                        |
| $c/\text{\AA}$                                | 17.3255(8)                                                       |
| $\alpha/^\circ$                               | 90                                                               |
| $\beta/^\circ$                                | 93.319(4)                                                        |
| $\gamma/^\circ$                               | 90                                                               |
| Volume/ $\text{\AA}^3$                        | 1489.13(14)                                                      |
| Z                                             | 4                                                                |
| $\rho_{\text{calc}}/\text{g/cm}^3$            | 1.248                                                            |
| $\mu/\text{mm}^{-1}$                          | 2.195                                                            |
| F(000)                                        | 600.0                                                            |
| Crystal size/ $\text{mm}^3$                   | $0.21 \times 0.09 \times 0.02$                                   |
| Radiation                                     | Cu $K\alpha$ ( $\lambda = 1.54184$ )                             |
| $2\theta$ range for data collection/ $^\circ$ | 7.02 to 156.434                                                  |
| Index ranges                                  | $-11 \leq h \leq 15$ , $-7 \leq k \leq 8$ , $-21 \leq l \leq 22$ |
| Reflections collected                         | 13974                                                            |
| Independent reflections                       | 2982 [ $R_{\text{int}} = 0.0307$ , $R_{\text{sigma}} = 0.0235$ ] |
| Data/restraints/parameters                    | 2982/0/175                                                       |
| Goodness-of-fit on $F^2$                      | 1.046                                                            |

Final R indexes [ $I \geq 2\sigma(I)$ ]  $R_1 = 0.0445$ ,  $wR_2 = 0.1230$   
 Final R indexes [all data]  $R_1 = 0.0557$ ,  $wR_2 = 0.1337$   
 Largest diff. peak/hole /  $e \text{ \AA}^{-3}$  0.32/-0.24

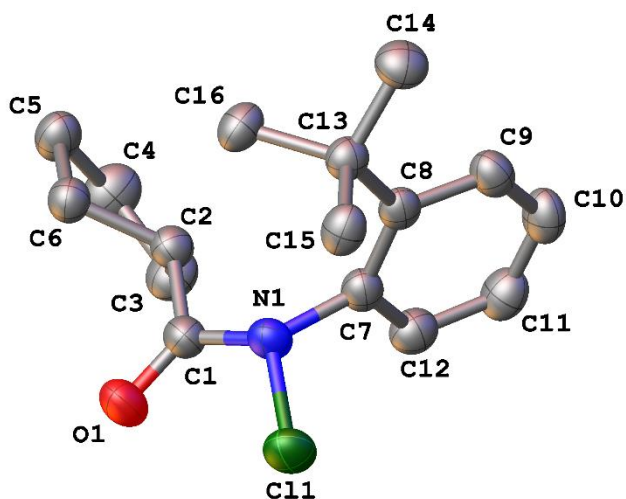

Figure 5: The structure of **2f** with probability ellipsoids drawn at the 50% probability level. Hydrogen atoms have been omitted for clarity

#### 4.7 Crystal data and structure refinement for **2g**

|                                               |                                                                  |
|-----------------------------------------------|------------------------------------------------------------------|
| Empirical formula                             | $C_{17}H_{24}ClNO$                                               |
| Formula weight                                | 293.82                                                           |
| Temperature/K                                 | 150.0(2)                                                         |
| Crystal system                                | monoclinic                                                       |
| Space group                                   | $P2_1/n$                                                         |
| $a/\text{\AA}$                                | 9.22350(10)                                                      |
| $b/\text{\AA}$                                | 7.00790(10)                                                      |
| $c/\text{\AA}$                                | 25.1221(4)                                                       |
| $\alpha/^\circ$                               | 90                                                               |
| $\beta/^\circ$                                | 94.528(2)                                                        |
| $\gamma/^\circ$                               | 90                                                               |
| Volume/ $\text{\AA}^3$                        | 1618.76(4)                                                       |
| Z                                             | 4                                                                |
| $\rho_{\text{calc}}/\text{g cm}^{-3}$         | 1.206                                                            |
| $\mu/\text{mm}^{-1}$                          | 2.041                                                            |
| $F(000)$                                      | 632.0                                                            |
| Crystal size/ $\text{mm}^3$                   | $0.1 \times 0.08 \times 0.03$                                    |
| Radiation                                     | $\text{Cu K}\alpha$ ( $\lambda = 1.54184$ )                      |
| $2\theta$ range for data collection/ $^\circ$ | 7.06 to 156.672                                                  |
| Index ranges                                  | $-11 \leq h \leq 11$ , $-8 \leq k \leq 6$ , $-30 \leq l \leq 31$ |
| Reflections collected                         | 15611                                                            |
| Independent reflections                       | 3262 [ $R_{\text{int}} = 0.0309$ , $R_{\text{sigma}} = 0.0237$ ] |
| Data/restraints/parameters                    | 3262/0/184                                                       |



Goodness-of-fit on  $F^2$  1.044  
 Final R indexes [ $I \geq 2\sigma(I)$ ]  $R_1 = 0.0368$ ,  $wR_2 = 0.0961$   
 Final R indexes [all data]  $R_1 = 0.0433$ ,  $wR_2 = 0.1014$   
 Largest diff. peak/hole /  $e \text{ \AA}^{-3}$  0.52/-0.27

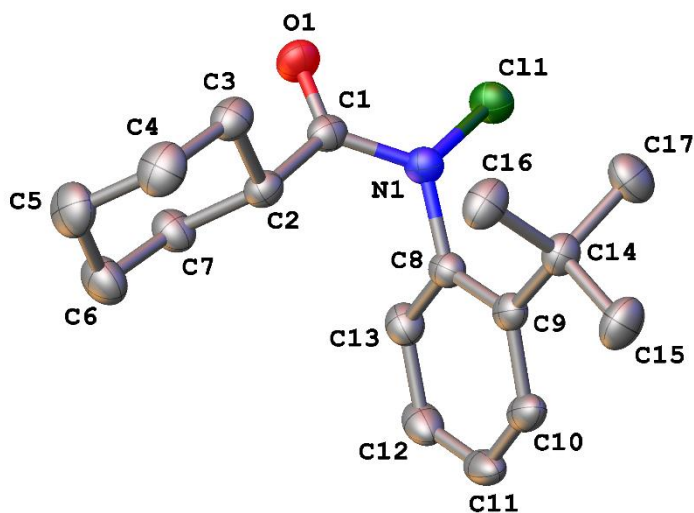

Figure 6: The structure of **2g** with probability ellipsoids drawn at the 50% probability level. Hydrogen atoms have been omitted for clarity

#### 4.8 Crystal data and structure refinement for **2l**

|                                               |                                                                  |
|-----------------------------------------------|------------------------------------------------------------------|
| Empirical formula                             | $C_{17}H_{18}ClNO$                                               |
| Formula weight                                | 287.77                                                           |
| Temperature/K                                 | 150.0(2)                                                         |
| Crystal system                                | orthorhombic                                                     |
| Space group                                   | $P2_12_12_1$                                                     |
| $a/\text{\AA}$                                | 7.63450(10)                                                      |
| $b/\text{\AA}$                                | 9.62950(10)                                                      |
| $c/\text{\AA}$                                | 20.4737(2)                                                       |
| $\alpha/^\circ$                               | 90                                                               |
| $\beta/^\circ$                                | 90                                                               |
| $\gamma/^\circ$                               | 90                                                               |
| Volume/ $\text{\AA}^3$                        | 1505.15(3)                                                       |
| Z                                             | 4                                                                |
| $\rho_{\text{calc}}/\text{g/cm}^3$            | 1.270                                                            |
| $\mu/\text{mm}^{-1}$                          | 2.194                                                            |
| $F(000)$                                      | 608.0                                                            |
| Crystal size/ $\text{mm}^3$                   | $0.22 \times 0.15 \times 0.08$                                   |
| Radiation                                     | $\text{Cu K}\alpha$ ( $\lambda = 1.54184$ )                      |
| $2\theta$ range for data collection/ $^\circ$ | 8.638 to 156.91                                                  |
| Index ranges                                  | $-9 \leq h \leq 8$ , $-10 \leq k \leq 12$ , $-24 \leq l \leq 24$ |
| Reflections collected                         | 19192                                                            |
| Independent reflections                       | 3057 [ $R_{\text{int}} = 0.0346$ , $R_{\text{sigma}} = 0.0202$ ] |
| Data/restraints/parameters                    | 3057/0/185                                                       |



|                                             |                                                               |
|---------------------------------------------|---------------------------------------------------------------|
| Reflections collected                       | 18811                                                         |
| Independent reflections                     | 3491 [R <sub>int</sub> = 0.0350, R <sub>sigma</sub> = 0.0235] |
| Data/restraints/parameters                  | 3491/420/275                                                  |
| Goodness-of-fit on F <sup>2</sup>           | 1.092                                                         |
| Final R indexes [I >= 2σ (I)]               | R <sub>1</sub> = 0.0361, wR <sub>2</sub> = 0.0986             |
| Final R indexes [all data]                  | R <sub>1</sub> = 0.0406, wR <sub>2</sub> = 0.1026             |
| Largest diff. peak/hole / e Å <sup>-3</sup> | 0.31/-0.26                                                    |

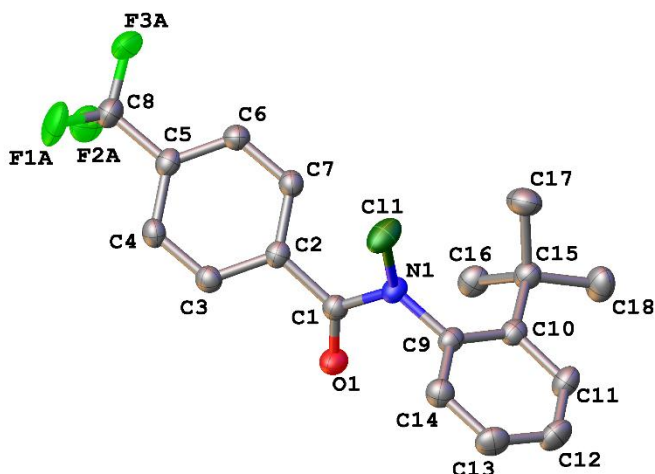

Figure 8: The structure of **2m** with probability ellipsoids drawn at the 50% probability level. . Only the disorder component with the highest occupancy is shown and hydrogen atoms have been omitted for clarity

#### 4.10 Crystal data and structure refinement for **2n**

|                                    |                                                   |
|------------------------------------|---------------------------------------------------|
| Empirical formula                  | C <sub>18</sub> H <sub>20</sub> ClNO <sub>2</sub> |
| Formula weight                     | 317.80                                            |
| Temperature/K                      | 150.0(2)                                          |
| Crystal system                     | triclinic                                         |
| Space group                        | P-1                                               |
| a/Å                                | 8.35130(10)                                       |
| b/Å                                | 13.4596(2)                                        |
| c/Å                                | 15.5830(2)                                        |
| α/°                                | 77.9650(10)                                       |
| β/°                                | 76.1000(10)                                       |
| γ/°                                | 77.2070(10)                                       |
| Volume/Å <sup>3</sup>              | 1635.64(4)                                        |
| Z                                  | 4                                                 |
| ρ <sub>calc</sub> /cm <sup>3</sup> | 1.291                                             |
| μ/mm <sup>-1</sup>                 | 2.116                                             |
| F(000)                             | 672.0                                             |
| Crystal size/mm <sup>3</sup>       | 0.27 × 0.09 × 0.05                                |
| Radiation                          | CuKα (λ = 1.54184)                                |
| 2θ range for data collection/°     | 5.922 to 157.166                                  |
| Index ranges                       | -9 ≤ h ≤ 10, -17 ≤ k ≤ 17, -19 ≤ l ≤ 19           |

Reflections collected 43178  
Independent reflections 6442 [ $R_{\text{int}} = 0.0342$ ,  $R_{\text{sigma}} = 0.0208$ ]  
Data/restraints/parameters 6442/0/406  
Goodness-of-fit on  $F^2$  1.065  
Final R indexes [ $I \geq 2\sigma(I)$ ]  $R_1 = 0.0395$ ,  $wR_2 = 0.1056$   
Final R indexes [all data]  $R_1 = 0.0431$ ,  $wR_2 = 0.1083$   
Largest diff. peak/hole /  $e \text{ \AA}^{-3}$  0.45/-0.46

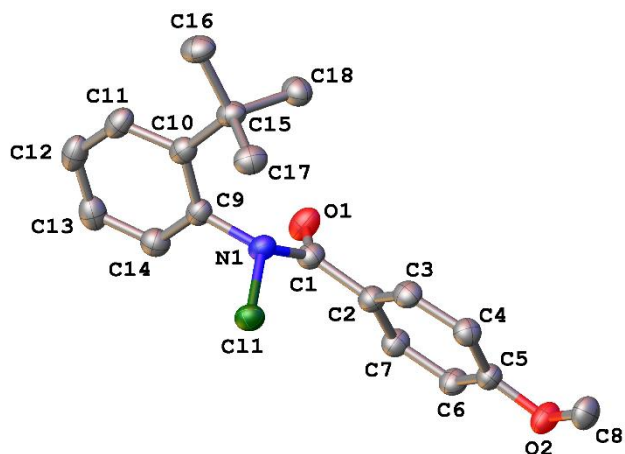

Figure 9: The structure of **2n** with probability ellipsoids drawn at the 50% probability level. Hydrogen atoms have been omitted for clarity

## 5. Computational Modelling

### 5.1 Computational Methods

All conformational searches were performed using MacroModel (Version 13.6)<sup>14</sup> in the gas phase utilizing the MMFF force field<sup>15-20</sup> and a mixture of Low Mode following and Monte Carlo search algorithms.<sup>21,22</sup> Quantum mechanical calculations were carried out using ORCA 5.0.2.<sup>23</sup> The molecular geometries were optimized using the PBE0-D3 functional<sup>24,25</sup> with the def2-TZVP basis set<sup>26,27</sup>. The optimisations were using the implicit SMD solvent model.<sup>28</sup> All single-point energies were separately calculated using  $\omega$ B97M-V functional<sup>29</sup> and def2-QZVPP<sup>26,27</sup> basis set using the SMD solvent model. Frequency calculations were performed on all structures and confirmed to contain no imaginary frequencies or just one imaginary frequency for ground states and transition states, respectively. Full set of DFT output files with optimized structures, frequencies and high-level single-point energies are provided in the accompanied archive. The archive structure is shown below in section 5.3.

### 5.2 Investigation of solvent effect on racemization and amide rotation barriers

To investigate the influence of a different solvent on the racemization barriers, single point energy calculations using SMD(DCM) solvent model were repeated for all structures (see below). This revealed that all of the free energy trends remained similar in DCM solvent, but the racemization free activation energies all were 1.7 – 3.2 kJ/mol higher in DCM compared to hexane. This may be due to more efficient ground state stabilization in the more polar solvent. All reported energies are in kJ/mol.

| amide           | $G_{\text{rel}}$ <i>trans</i> vs <i>cis</i><br>(hexane) | $G_{\text{rel}}$ <i>trans</i> vs <i>cis</i><br>(DCM) | $\Delta G^\ddagger$ calc.<br>(hexane) | $\Delta G^\ddagger$ calc.<br>(DCM) |
|-----------------|---------------------------------------------------------|------------------------------------------------------|---------------------------------------|------------------------------------|
| <b>2b</b> (Et)  | +2.1                                                    | +2.1                                                 | 117.2                                 | 120.4                              |
| <b>2d</b> (cPr) | +4.3                                                    | +5.3                                                 | 115.0                                 | 116.7                              |
| <b>2l</b> (Ph)  | -3.4                                                    | -1.5                                                 | 100.7                                 | 103.2                              |
| <b>2n</b> (PMP) | -4.8                                                    | -3.7                                                 | 97.8                                  | 100.2                              |

### 5.3 Summary of additional geometrical parameters

For comparison purposes, key additional geometrical parameters (bond lengths and angles) at the transition states for racemization and *cis-trans* isomerization are identified below:

#### Racemization transition states:

| amide           | Bond lengths (in Å) |      |      | Bond angles (in degrees) |         |         |
|-----------------|---------------------|------|------|--------------------------|---------|---------|
|                 | C(O)-N              | N-Cl | N-Ar | C(O)-N-Cl                | Cl-N-Ar | Ar-N-CO |
| <b>2b</b> (Et)  | 1.47                | 1.71 | 1.42 | 103.6                    | 126.5   | 116.6   |
| <b>2d</b> (cPr) | 1.47                | 1.71 | 1.42 | 103.2                    | 125.7   | 116.1   |
| <b>2l</b> (Ph)  | 1.46                | 1.72 | 1.43 | 101.8                    | 125     | 118.1   |
| <b>2n</b> (PMP) | 1.47                | 1.72 | 1.43 | 102.2                    | 125.1   | 117.3   |

#### Cis-trans isomerization transition states:

| amide           | Bond lengths (in Å) |      |      | Bond angles (in degrees) |         |         |
|-----------------|---------------------|------|------|--------------------------|---------|---------|
|                 | C(O)-N              | N-Cl | N-Ar | C(O)-N-Cl                | Cl-N-Ar | Ar-N-CO |
| <b>2b</b> (Et)  | 1.48                | 1.76 | 1.44 | 104.8                    | 111.6   | 115.7   |
| <b>2d</b> (cPr) | 1.47                | 1.76 | 1.44 | 106.3                    | 110.8   | 115     |
| <b>2l</b> (Ph)  | 1.47                | 1.76 | 1.45 | 106.6                    | 110.5   | 114.8   |
| <b>2n</b> (PMP) | 1.47                | 1.76 | 1.45 | 106.6                    | 110.1   | 114.7   |

### 5.4 Summary of the associated computational dataset contents

This dataset contains ORCA DFT output files of the key ground-states and transition state DFT optimized structures. The dataset contains 160 files in total. The data is organized by the chloroamide studies, covering substrates **2b**, **2l**, **2d**, **2n**. Each of the substrate folders contain subfolders for the ground state calculations, racemization transition states and the *cis-trans* isomerization transition states. Each of the lower level folders contain the output of the final optimization calculation (\*opt\*.out), frequency calculation (\*freq.out) as well as single point calculation (\*\_sp.out). All optimized geometries are also provided as \*.xyz files for even better usability. The full dataset structure is shown below.

All of the files can be opened in any text editor. ORCA output structures can be viewed and the frequency modes visualised in Avogadro, jmol and in most other molecular viewers/editors. \*.xyz files can be viewed in essentially all 3D molecular editors and viewers.

```
|— Et (2b)
| |— Cis-trans isomerization
| | |— Et_cisiso1_sp.out
| | |— Et_cisiso1freq.out
```

- Et\_cisiso1tsopt.out
- Et\_cisiso1tsopt.xyz
- Et\_cisiso2\_sp.out
- Et\_cisiso2freq.out
- Et\_cisiso2tsopt.out
- Et\_cisiso2tsopt.xyz
- **Ground**
  - Etciscis\_end.xyz
  - Etciscis\_end\_sp.out
  - Etciscis\_endfreq.out
  - Etciscis\_endopt.out
  - Etciscis\_start.xyz
  - Etciscis\_start\_sp.out
  - Etciscis\_startfreq.out
  - Etciscis\_startopt.out
  - Etcistrans\_end.xyz
  - Etcistrans\_end\_sp.out
  - Etcistrans\_endfreq.out
  - Etcistrans\_endopt.out
  - Etcistrans\_start.xyz
  - Etcistrans\_start\_sp.out
  - Etcistrans\_startfreq.out
  - Etcistrans\_startopt.out
  - Ettranstrans\_end.xyz
  - Ettranstrans\_end\_sp.out
  - Ettranstrans\_endfreq.out
  - Ettranstrans\_endopt.out
  - Ettranstrans\_start.xyz
  - Ettranstrans\_start\_sp.out
  - Ettranstrans\_startfreq.out
  - Ettranstrans\_startopt.out
- Racemization
  - Etciscis.xyz
  - Etciscis\_sp.out
  - Etciscisfreq.out
  - Etciscistsoptd.out
  - Etcistrans.xyz
  - Etcistrans\_sp.out
  - Etcistransfreq.out
  - Etcistranstsopt.out
  - Ettranstrans.xyz
  - Ettranstrans\_sp.out
  - Ettranstransfreq.out
  - Ettranstranstsopt.out
- **PMP (2n)**
  - Cis-trans isomerization
    - PMP\_transiso1\_sp.out

- PMP\_transiso1freq.out
- PMP\_transiso1tsopt.out
- PMP\_transiso1tsopt.xyz
- PMP\_transiso2\_sp.out
- PMP\_transiso2freq.out
- PMP\_transiso2tsopt.out
- PMP\_transiso2tsopt.xyz
- Ground
  - PMP\_Rcis.xyz
  - PMP\_Rcis\_sp.out
  - PMP\_Rcisfreq.out
  - PMP\_Rcisopt.out
  - PMP\_Rtrans.xyz
  - PMP\_Rtrans\_sp.out
  - PMP\_Rtransfreq.out
  - PMP\_Rtransopt.out
  - PMP\_Scis.xyz
  - PMP\_Scis\_sp.out
  - PMP\_Scisfreq.out
  - PMP\_Scisopt.out
  - PMP\_Strans.xyz
  - PMP\_Strans\_sp.out
  - PMP\_Stransfreq.out
  - PMP\_Stransopt.out
- Racemization
  - PMPciscis.xyz
  - PMPciscis\_sp.out
  - PMPciscisfreq.out
  - PMPciscistsopt.out
  - PMPcistrans.xyz
  - PMPcistrans\_sp.out
  - PMPcistransfreq.out
  - PMPcistranstsoptb.out
  - PMPtranstrans.xyz
  - PMPtranstrans\_sp.out
  - PMPtranstransfreq.out
  - PMPtranstranstsoptb.out
- **Ph (2I)**
  - Cis-trans isomerization
    - Ph\_transiso1\_sp.out
    - Ph\_transiso1freq.out
    - Ph\_transiso1tsopt.out
    - Ph\_transiso1tsopt.xyz
    - Ph\_transiso2\_sp.out
    - Ph\_transiso2freq.out
    - Ph\_transiso2tsopt.out
    - Ph\_transiso2tsopt.xyz





- └─ Cyprop\_cisiso2tsopt.xyz
- └─ Ground
  - └─ cyprop\_Rcis.xyz
  - └─ cyprop\_Rcis\_sp.out
  - └─ cyprop\_Rcisfreq.out
  - └─ cyprop\_Rcisopt.out
  - └─ cyprop\_Rtrans.xyz
  - └─ cyprop\_Rtrans\_sp.out
  - └─ cyprop\_Rtransfreq.out
  - └─ cyprop\_Rtransopt.out
  - └─ cyprop\_Scis.xyz
  - └─ cyprop\_Scis\_sp.out
  - └─ cyprop\_Scisfreq.out
  - └─ cyprop\_Scisopt.out
  - └─ cyprop\_Strans.xyz
  - └─ cyprop\_Strans\_sp.out
  - └─ cyprop\_Stransfreq.out
  - └─ cyprop\_Stransopt.out
- └─ Racemization
  - └─ cyprop\_ciscis.xyz
  - └─ cyprop\_ciscis\_sp.out
  - └─ cyprop\_ciscisfreq.out
  - └─ cyprop\_ciscistsopt.out
  - └─ cyprop\_cistrans.xyz
  - └─ cyprop\_cistrans\_sp.out
  - └─ cyprop\_cistransfreq.out
  - └─ cyprop\_cistranstsopt.out
  - └─ cyprop\_transtrans.xyz
  - └─ cyprop\_transtrans\_sp.out
  - └─ cyprop\_transtransfreq.out
  - └─ cyprop\_transtranstsopt.out

## 6. References

---

- (1) J.-P. Heeb, J. Clayden, M. D. Smith and R. J. Armstrong, *Nat. Protoc.*, 2023, **18**, 2745-2771.
- (2) O. Kitagawa, M. Yoshikawa, H. Tanabe, T. Morita, M. Takahashi, Y. Dobashi and T. Taguchi, *J. Am. Chem. Soc.* 2006, **128**, 12923-12931.
- (3) A. D. Hughes, D. A. Price and N. S. Simpkins, *J. Chem. Soc., Perkin Trans. 1*, 1999, 1295-1304.
- (4) J. J. Neumann, S. Rakshit, T. Dröge and F. Glorius, *Angew. Chem. Int. Ed.* 2009, **48**, 6892-6895.
- (5) J. Long, X. Cao, L. Zhu, R. Qiu, C.-T. Au, S.-F. Yin, T. Iwasaki and N. Kambe, *Org. Lett.*, 2017, **19**, 2793-2796.
- (6) O. Trapp, *Chirality*, 2006, **18**, 489-497.
- (7) M. Charton, *J. Am. Chem. Soc.* 1975, **97**, 1552-1556.
- (8) M. Charton, *J. Org. Chem.* 1976, **41**, 2217-2220
- (9) L. You, J. S. Berman, A. Lucksanawichien, E. V. Anslyn, *J. Am. Chem. Soc.*, 2012, **134**, 7126-7134.
- (10) J. A. MacPhee, A. Panaye, J.-E. Dubois, *Tetrahedron* **1978**, *34*, 3553-3562.
- (11) R. C. Clark, J.S. Reid, *Acta Cryst.*, 1995, **A51**, 887
- (12) CrysAlisPro, Rigaku Oxford Diffraction, Tokyo, Japan.
- (13) Sheldrick, G.M. *Acta Crystallogr., Sect. A: Found. Crystallogr.* **2015**, *71*, 3-8.
- (14) Sheldrick, G.M. *Acta Crystallogr., Sect. A: Found. Crystallogr.* **2008**, *64*, 112-122.
- (15) Dolomanov, O.V.; Bourhis, L.J.; Gildea, R.J.; Howard, J.A.K.; Puschmann, H. *J. Appl. Cryst.* **2009**, *42*, 339-341.
- (14) MacroModel, version 13.6, Schrödinger, LLC, New York, NY, 2022.
- (15) T. A. Halgren *J. Comput. Chem.*, 1996, **17**, 490-519.
- (16) T. A. Halgren *J. Comput. Chem.*, 1996, **17**, 520-552.
- (17) T. A. Halgren *J. Comput. Chem.*, 1996, **17**, 553-586.
- (18) T. A. Halgren and R. B. Nachbar, *J. Comput. Chem.*, 1996, **17**, 587-615.
- (19) T. A. Halgren *J. Comput. Chem.*, 1996, **17**, 616-641.
- (20) T. A. Halgren *J. Comput. Chem.*, 1999, **20**, 720-729.
- (21) I. Kolossváry and W. C. Guida, *J. Comput. Chem.*, 1999, **20**, 1671-1684.
- (22) I. Kolossváry and W. C. Guida, *J. Am. Chem. Soc.*, 1996, **118**, 5011-5019.
- (23) F. Neese, F. Wennmohs, U. Becker, C. Riplinger *J. Chem. Phys.* 2020, **152**, 224108
- (24) C. Adamo, V. Barone, *J. Chem. Phys.*, 1999, **110**, 6158-6169
- (25) S. Grimme, J. Antony, S. Ehrlich and H. Krieg, *J. Chem. Phys.*, 2010, **132**, 154104
- (26) F. Weigend, R. Ahlrichs *Phys. Chem. Chem. Phys.* 2005, **7**, 3297-3305
- (27) F. Weigend, *Phys. Chem. Chem. Phys.* 2006, **8**, 1057-1065.
- (28) A. V. Marenich, C. J. Cramer, D. G. Truhlar *J. Phys. Chem. B* 2009, **113**, 6378-6396.
- (29) N. Mardirossian, M. Head-Gordon, *J. Chem. Phys.* 2016, **144**, 214110.

## 7. NMR Spectra

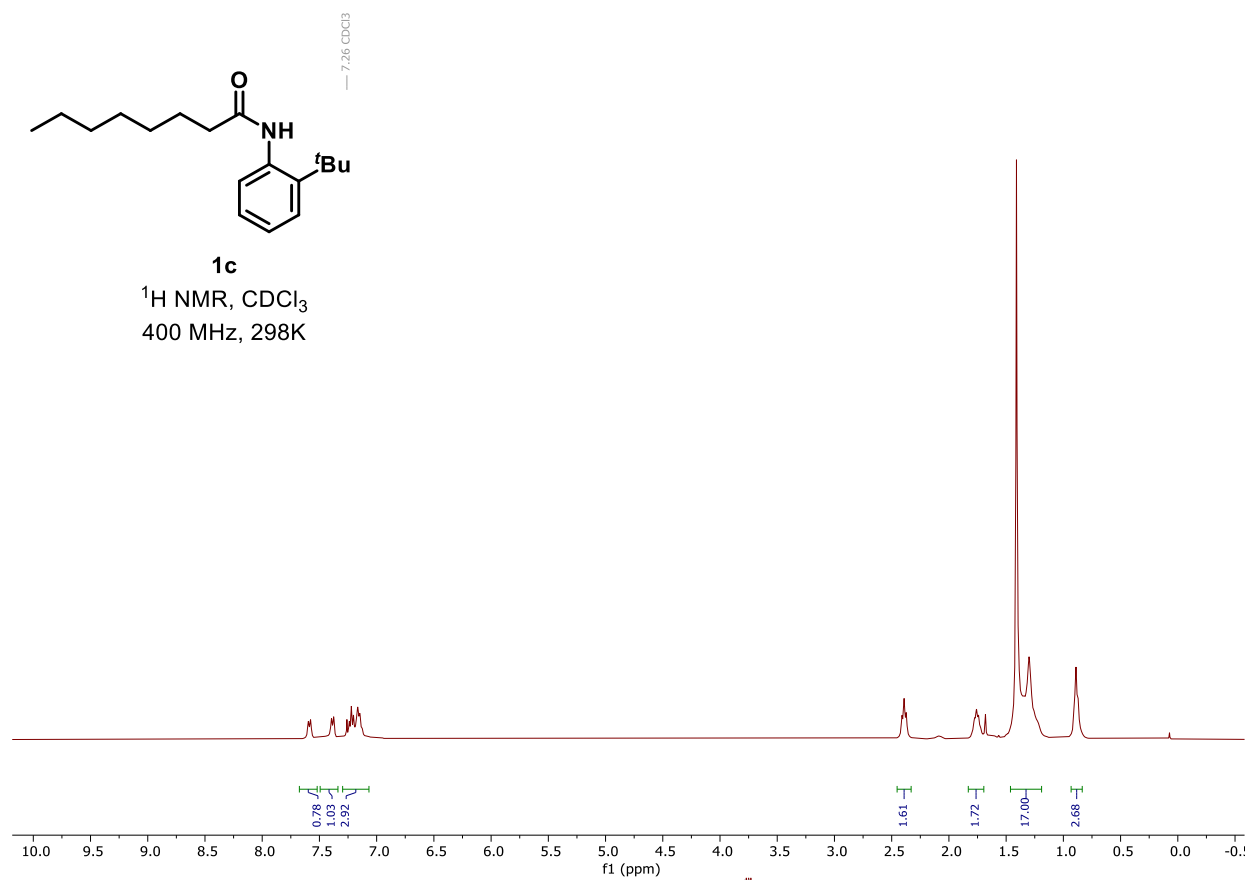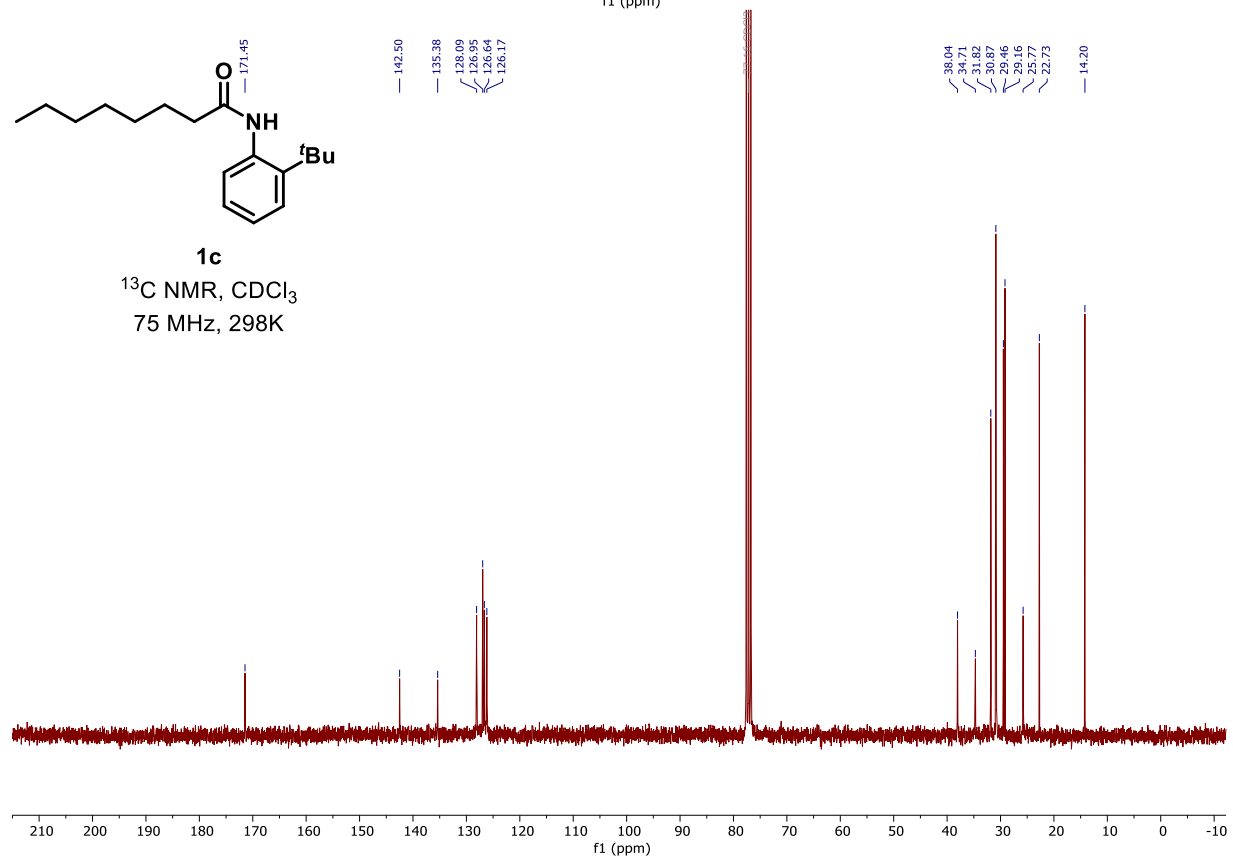

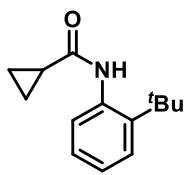

**1d**

<sup>1</sup>H NMR, CDCl<sub>3</sub>  
400 MHz, 298K

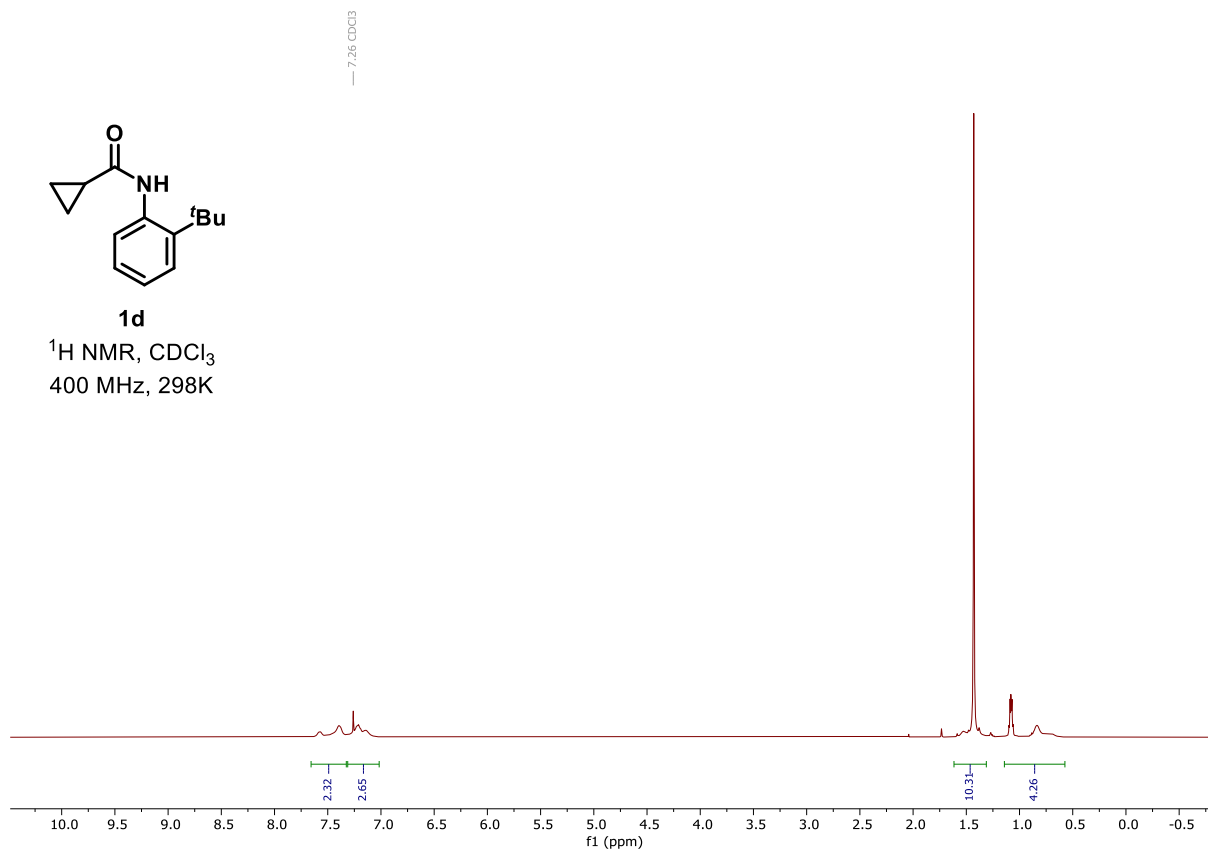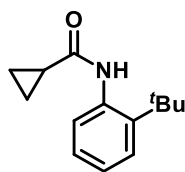

**1d**

<sup>13</sup>C NMR, CDCl<sub>3</sub>  
75 MHz, 298K

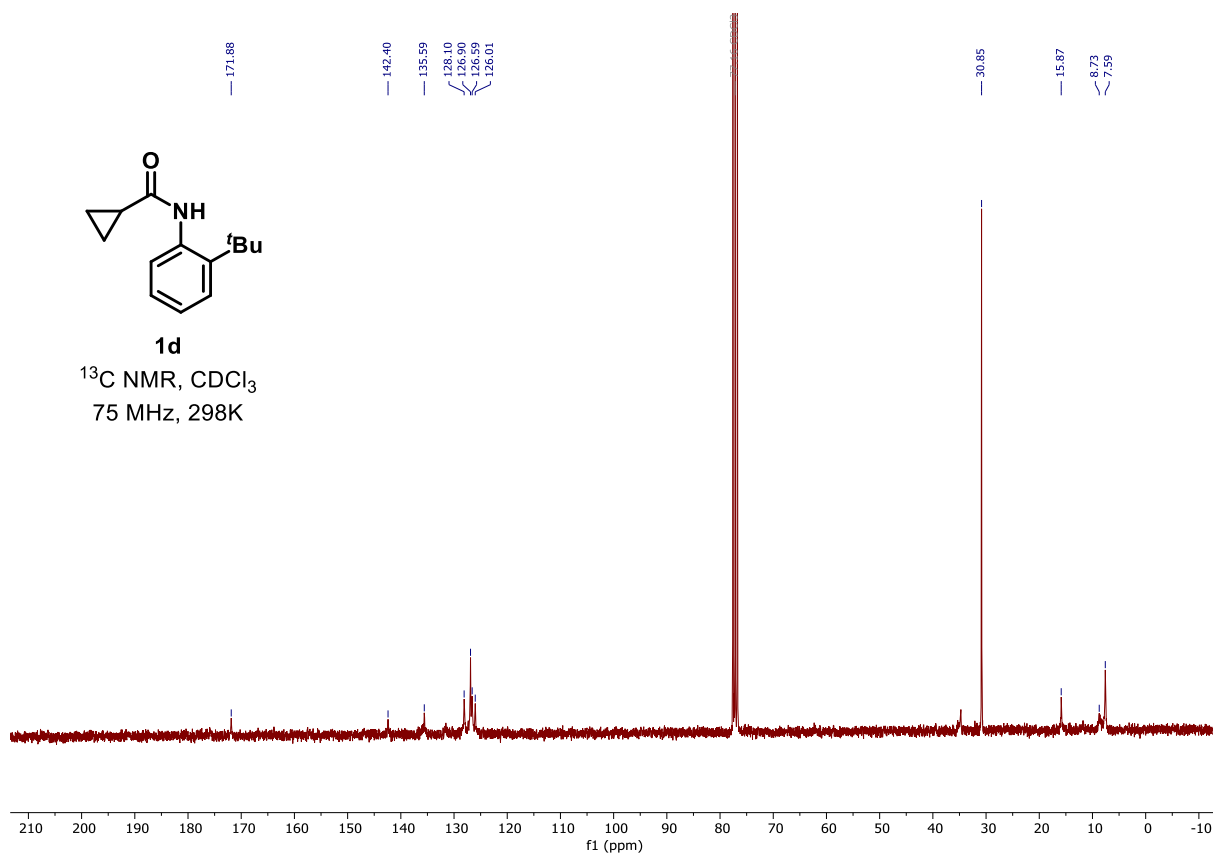

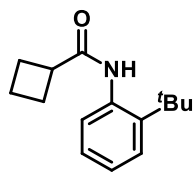

**1e**

$^1\text{H}$  NMR,  $\text{CDCl}_3$   
300 MHz, 298K

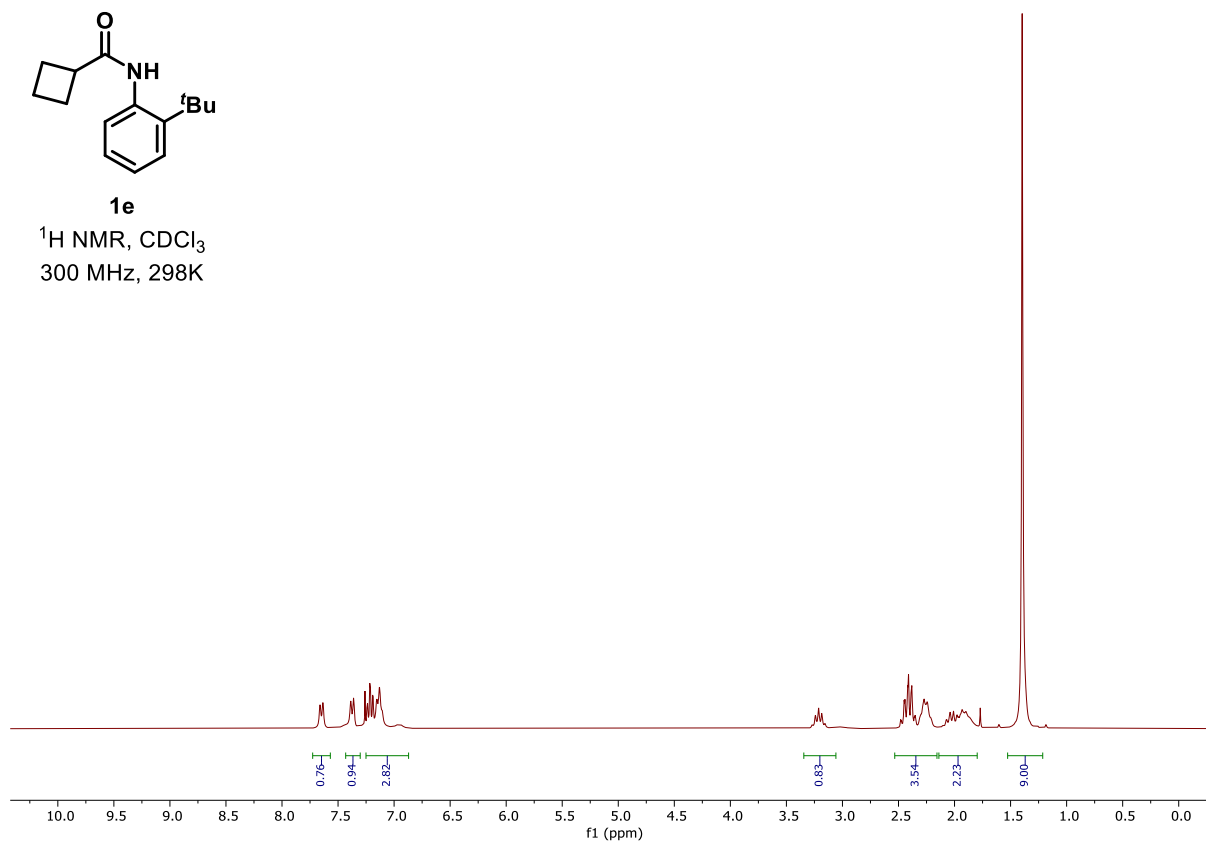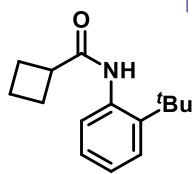

**1e**

$^{13}\text{C}$  NMR,  $\text{CDCl}_3$   
75 MHz, 298K

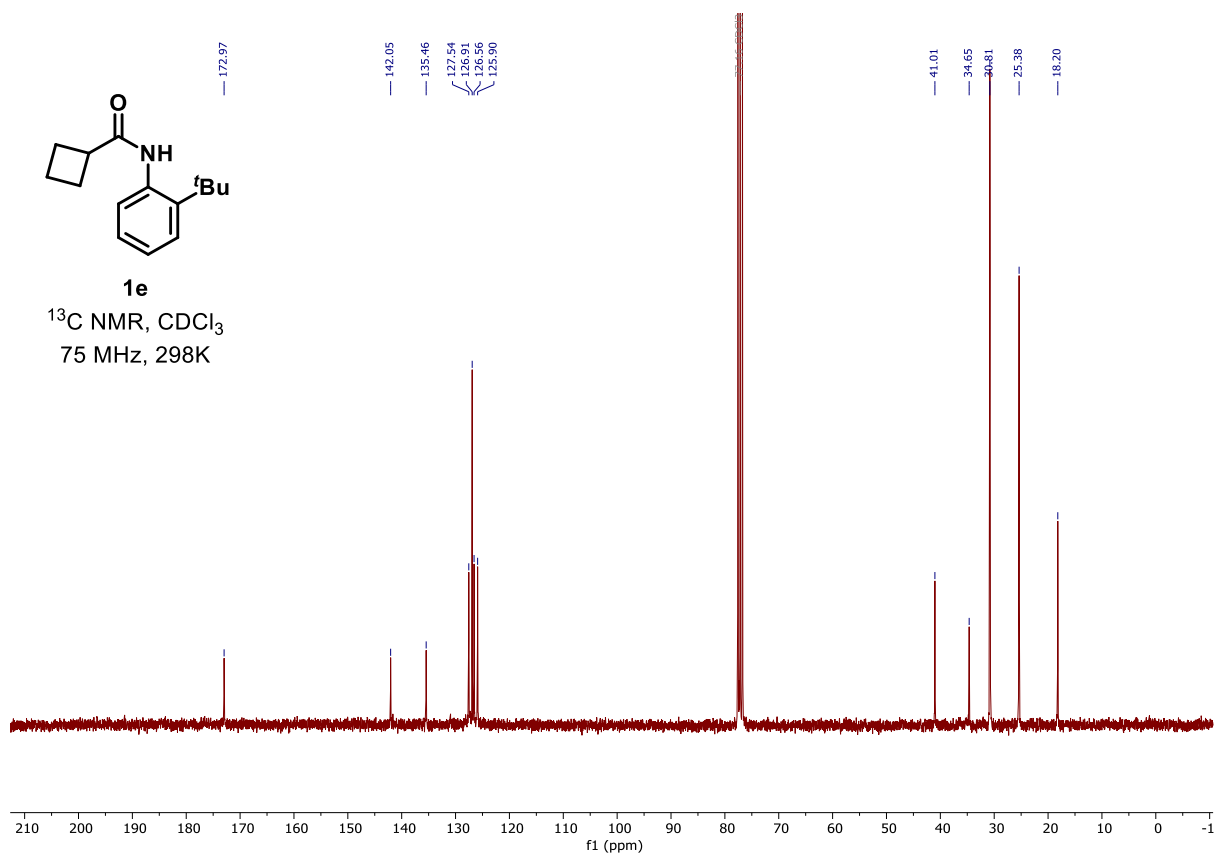

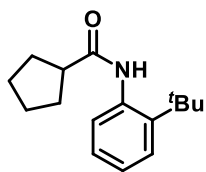

**1f**

$^1\text{H}$  NMR,  $\text{CDCl}_3$   
300 MHz, 298K

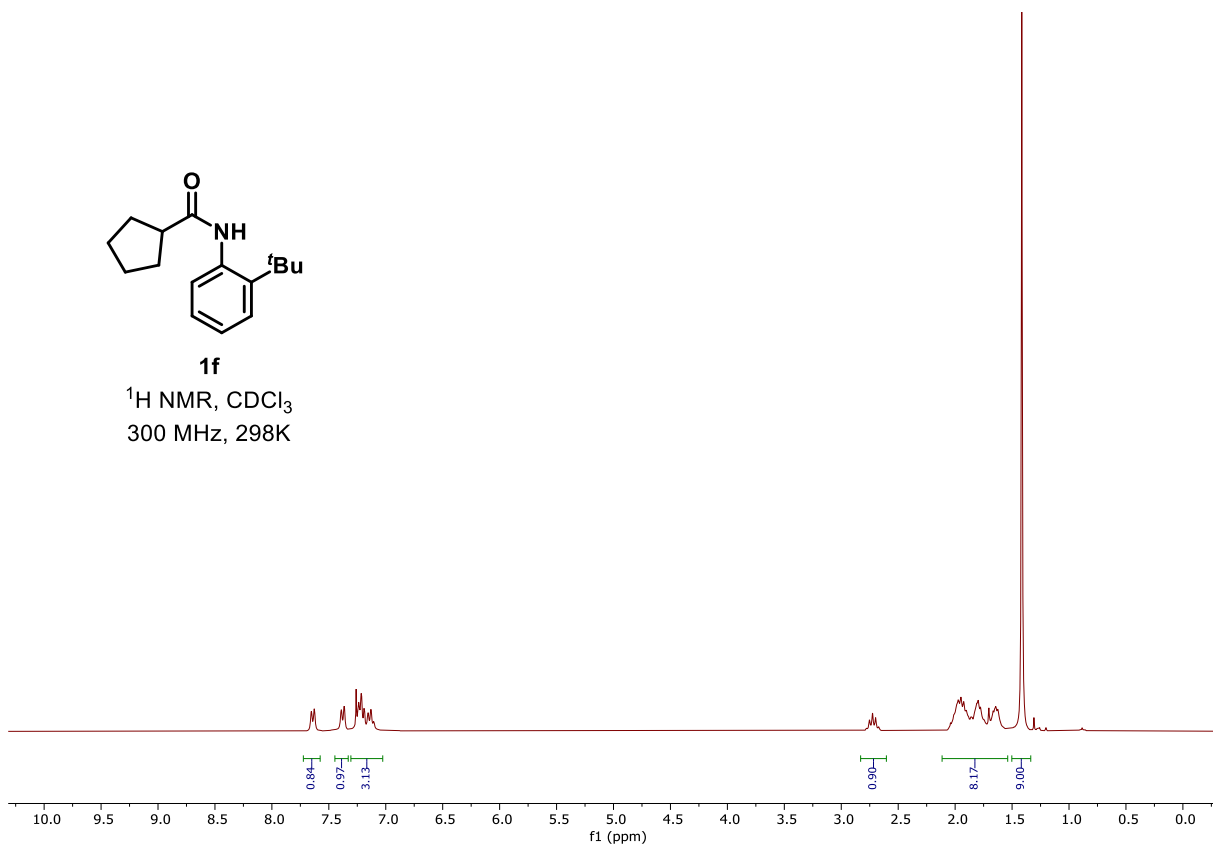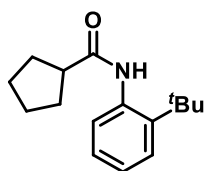

**1f**

$^{13}\text{C}$  NMR,  $\text{CDCl}_3$   
75 MHz, 298K

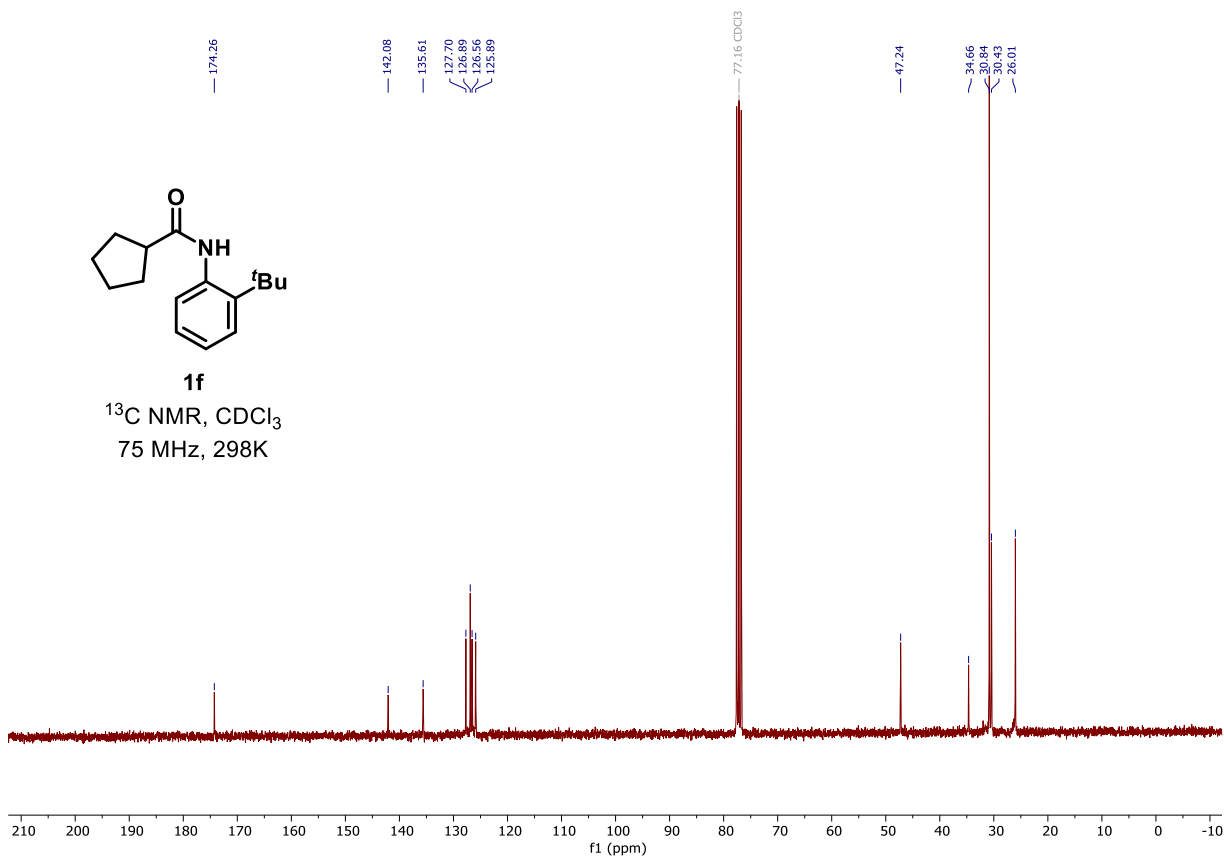

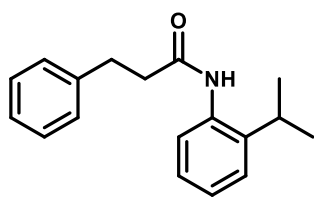

**1h**

<sup>1</sup>H NMR, CDCl<sub>3</sub>  
400 MHz, 298K

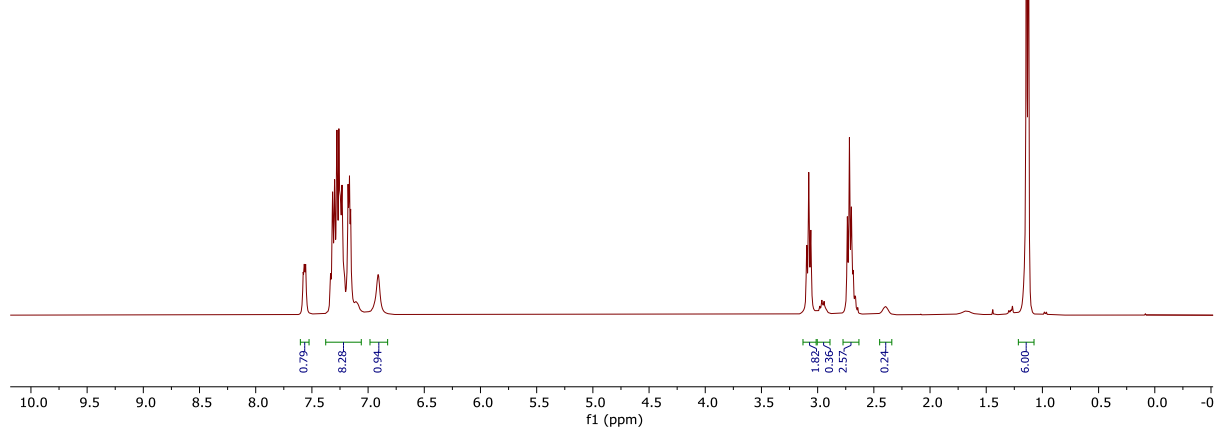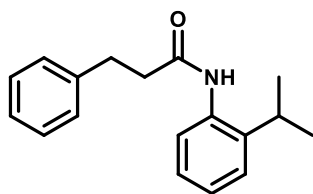

**1h**

<sup>13</sup>C NMR, CDCl<sub>3</sub>  
101 MHz, 298K

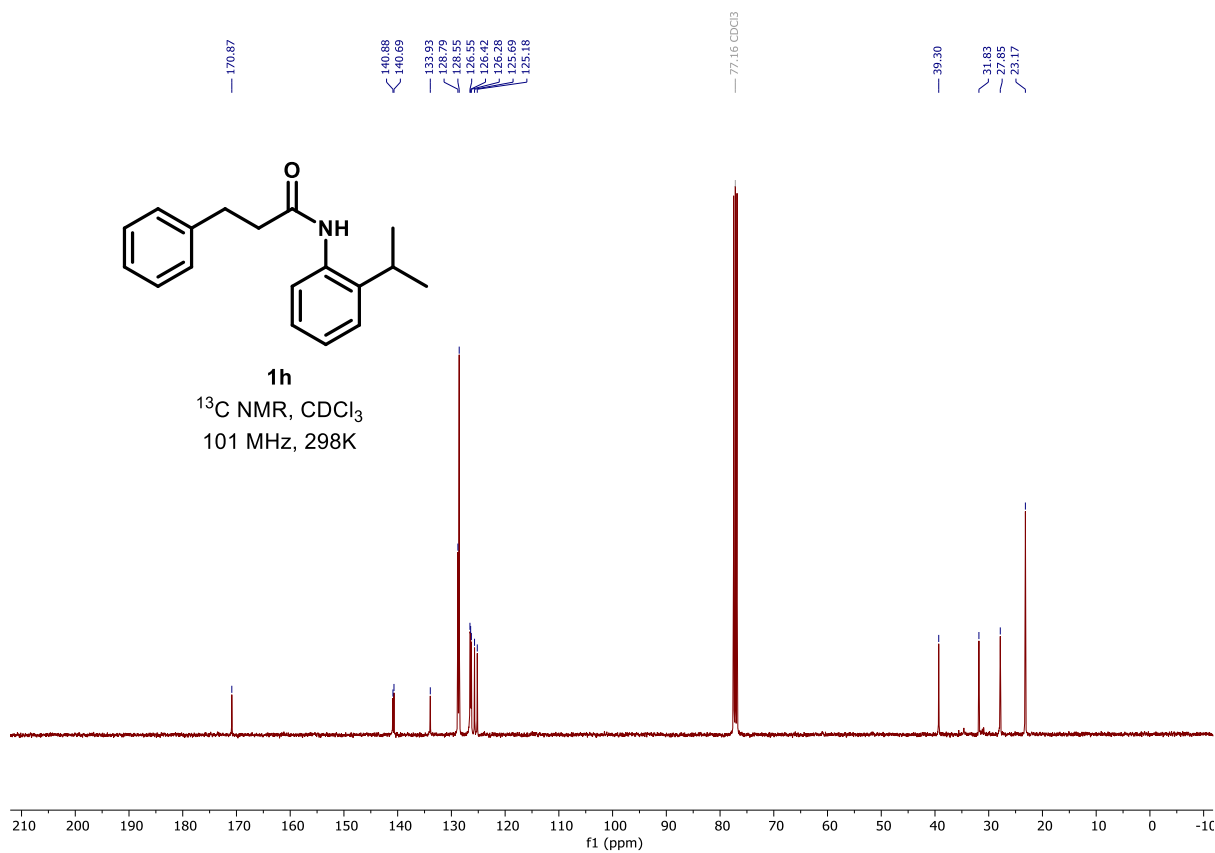



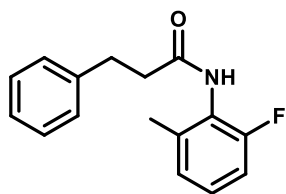

1i

$^1\text{H NMR}$ ,  $\text{CDCl}_3$   
400 MHz, 298K

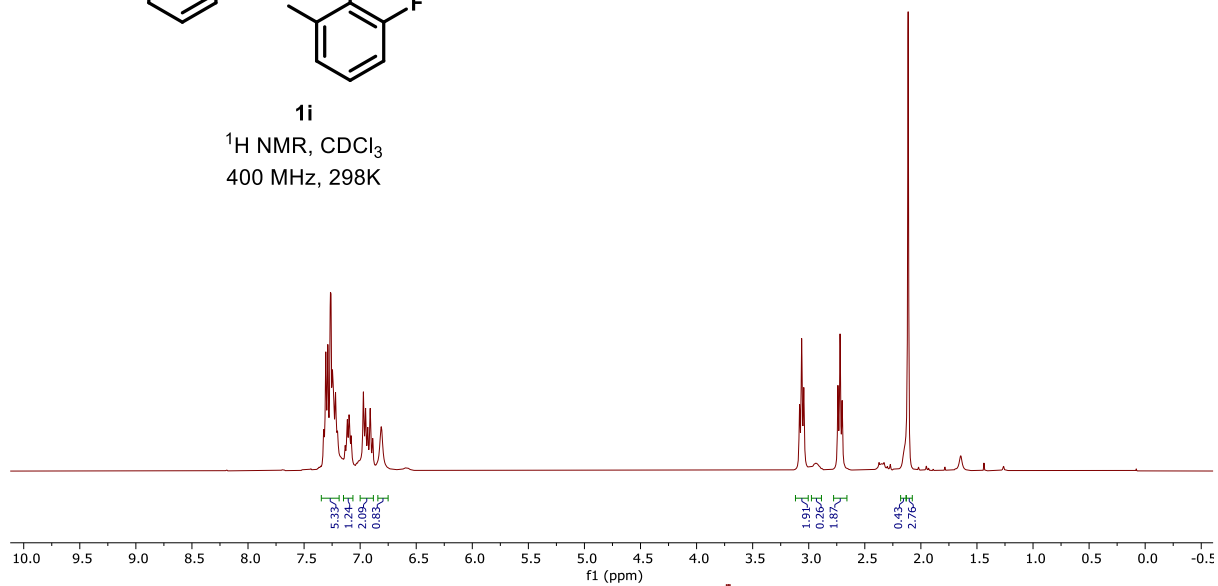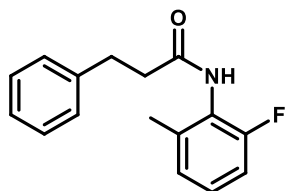

1i

$^{13}\text{C NMR}$ ,  $\text{CDCl}_3$   
101 MHz, 298K

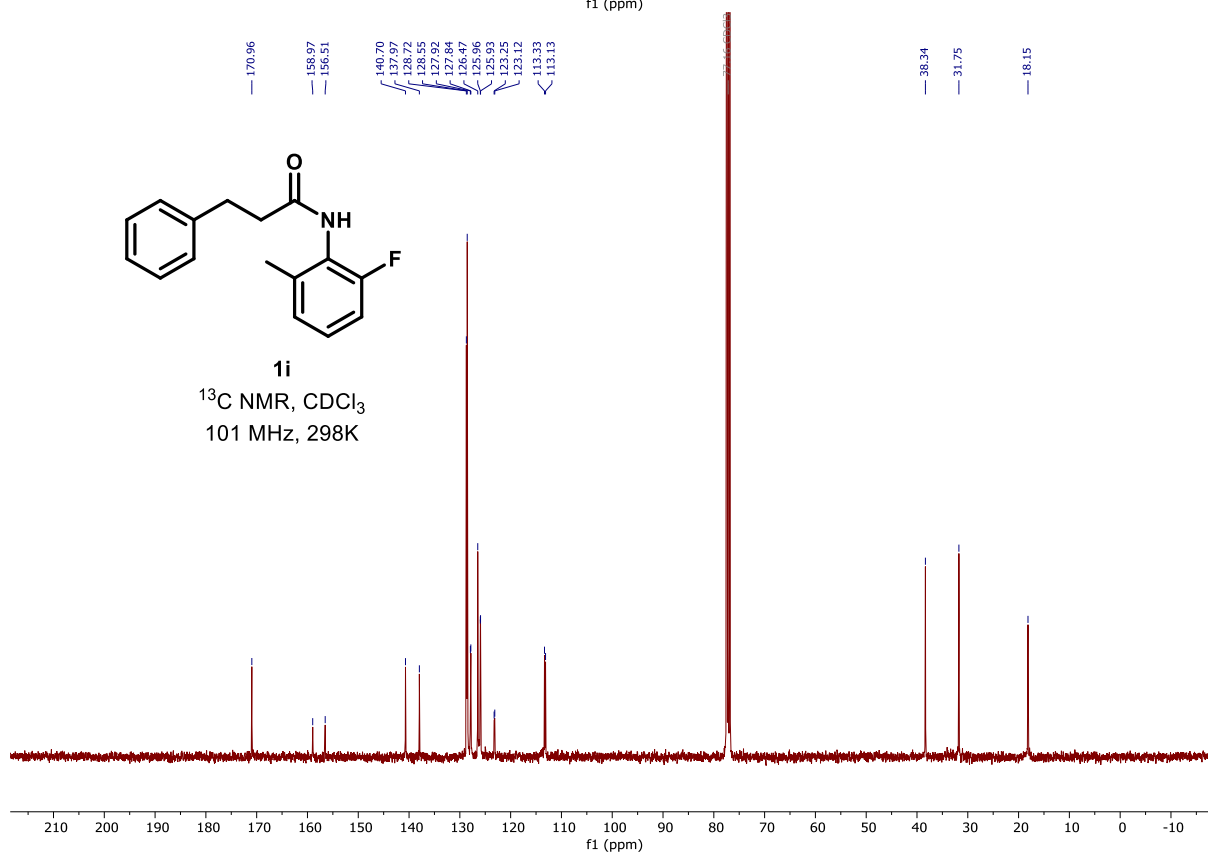

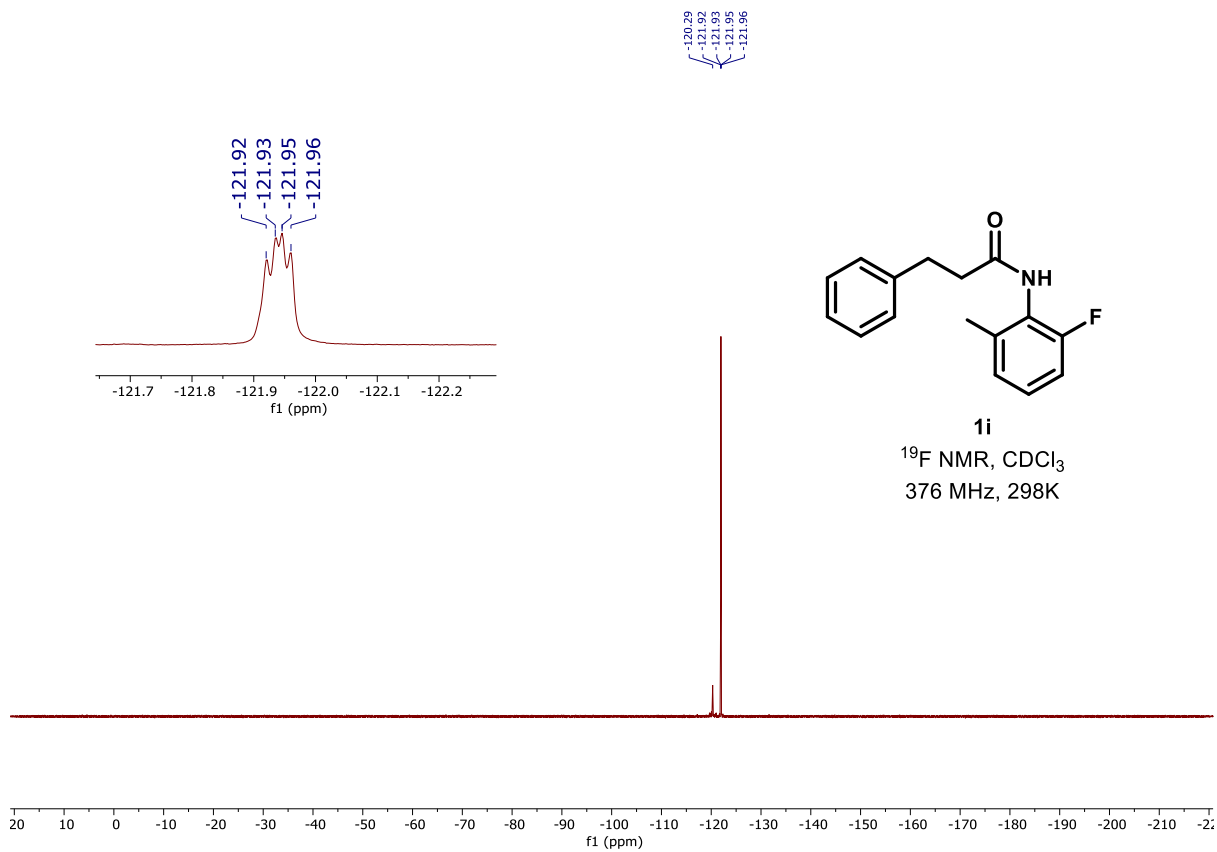

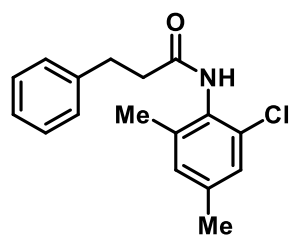

1j

<sup>1</sup>H NMR, CDCl<sub>3</sub>  
400 MHz, 298 K

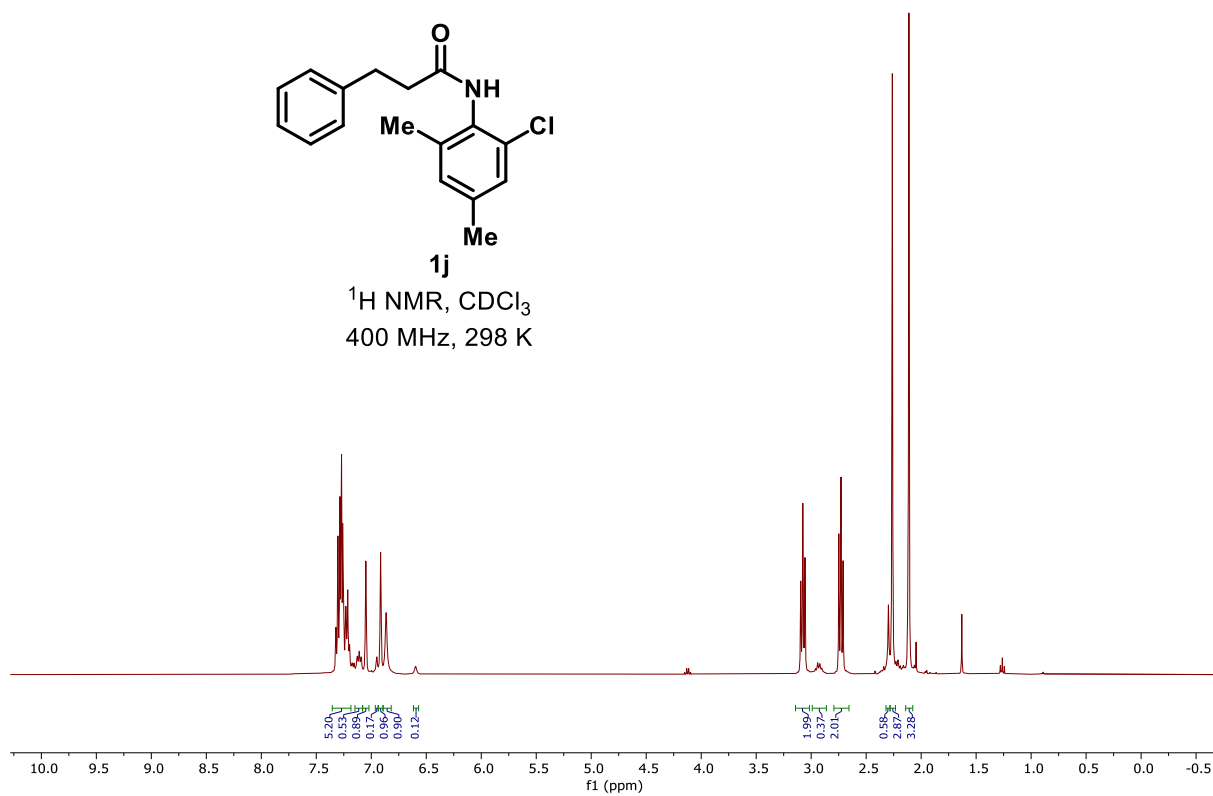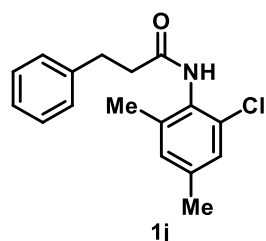

1j

<sup>13</sup>C NMR, CDCl<sub>3</sub>  
75 MHz, 298 K

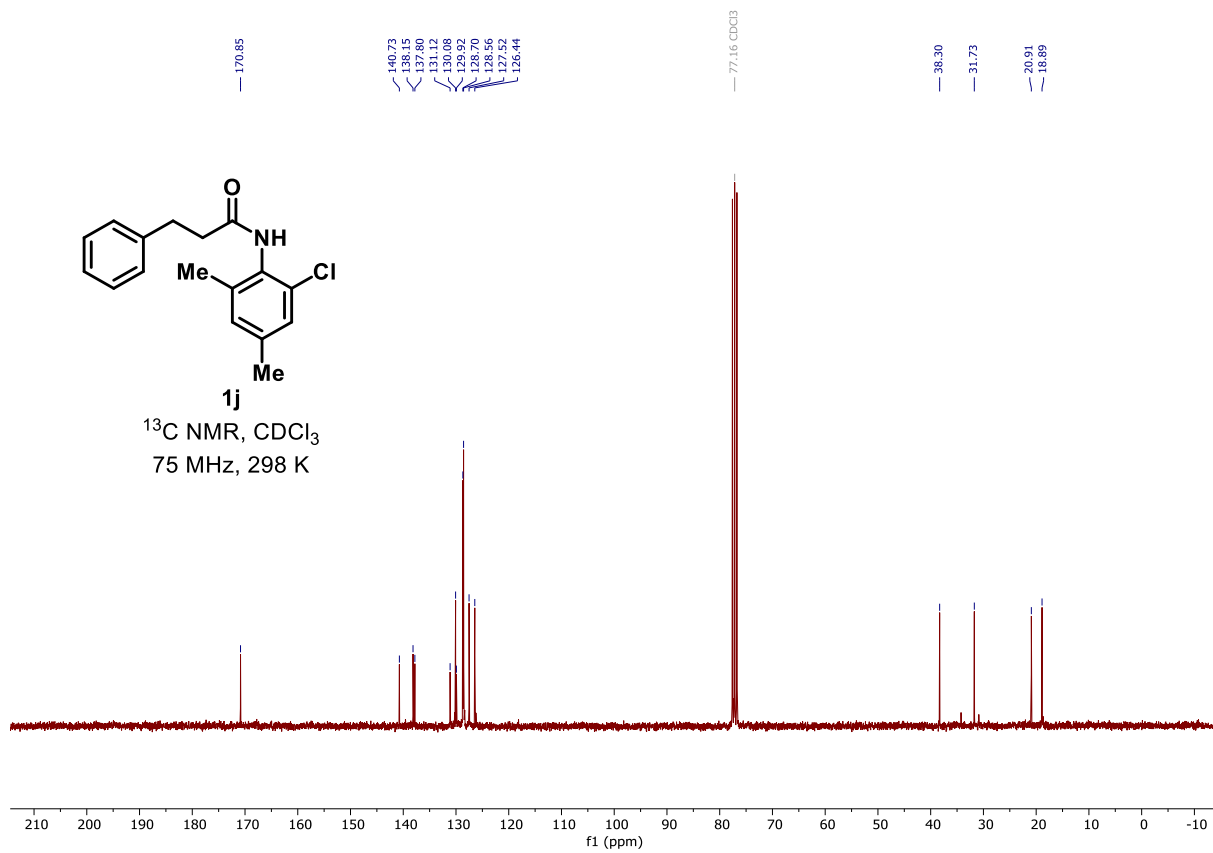

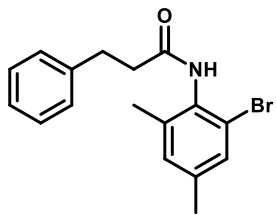

1k

<sup>1</sup>H NMR, CDCl<sub>3</sub>  
400 MHz, 298K

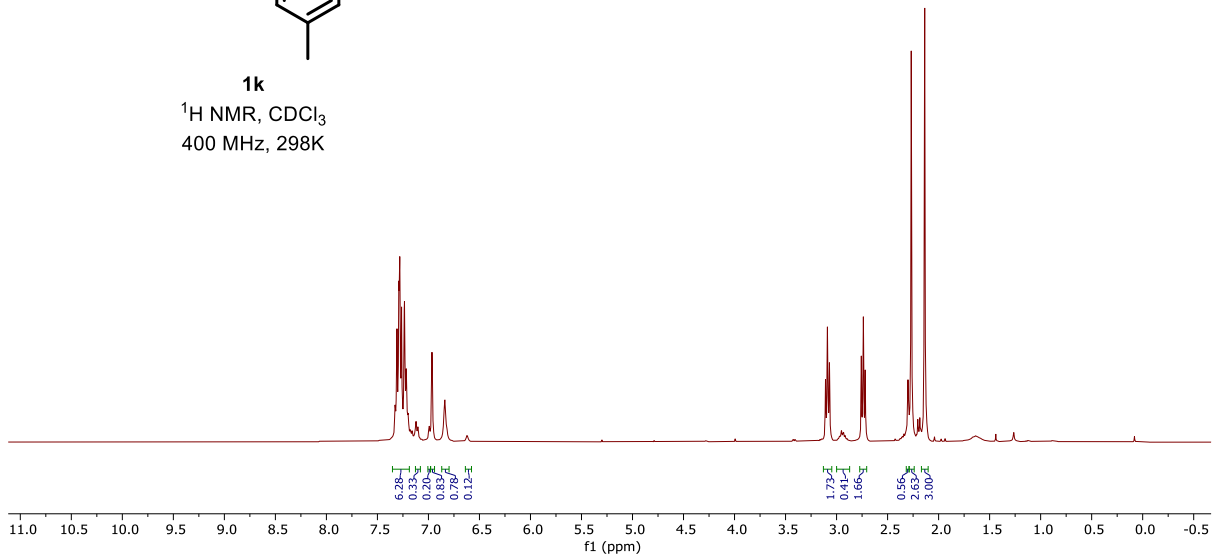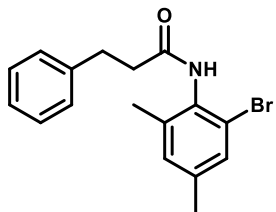

1k

<sup>13</sup>C NMR, CDCl<sub>3</sub>  
101 MHz, 298K

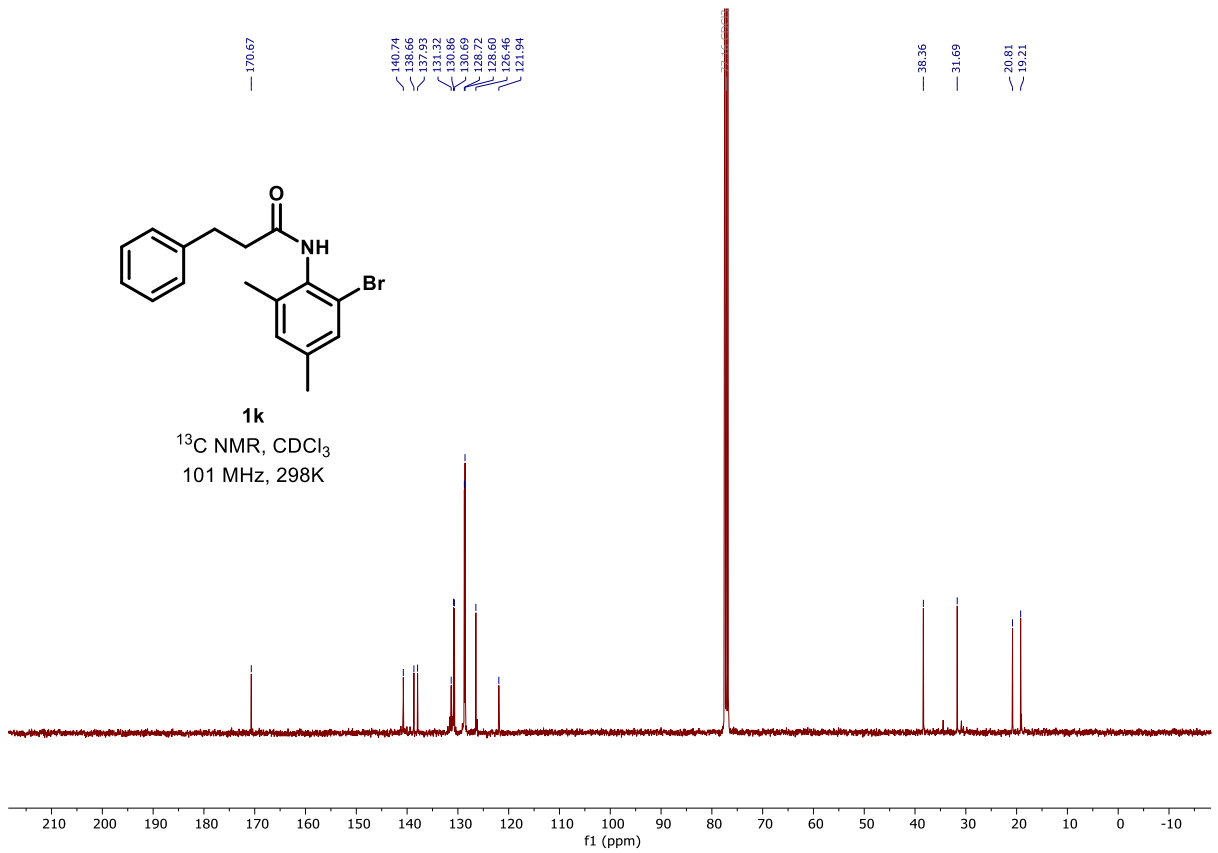

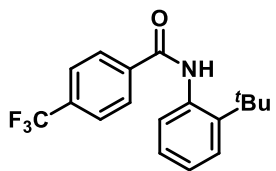

1m

$^1\text{H}$  NMR,  $\text{CDCl}_3$   
300 MHz, 298K

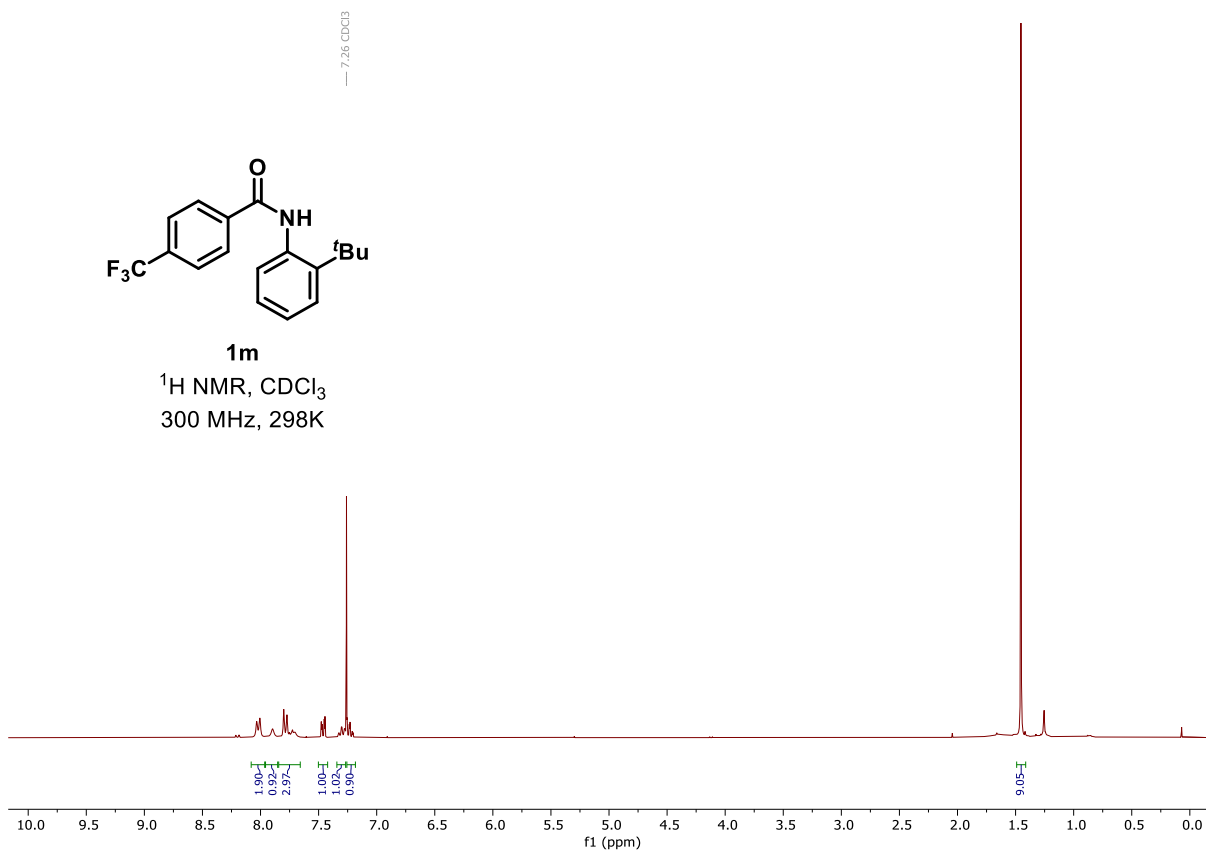

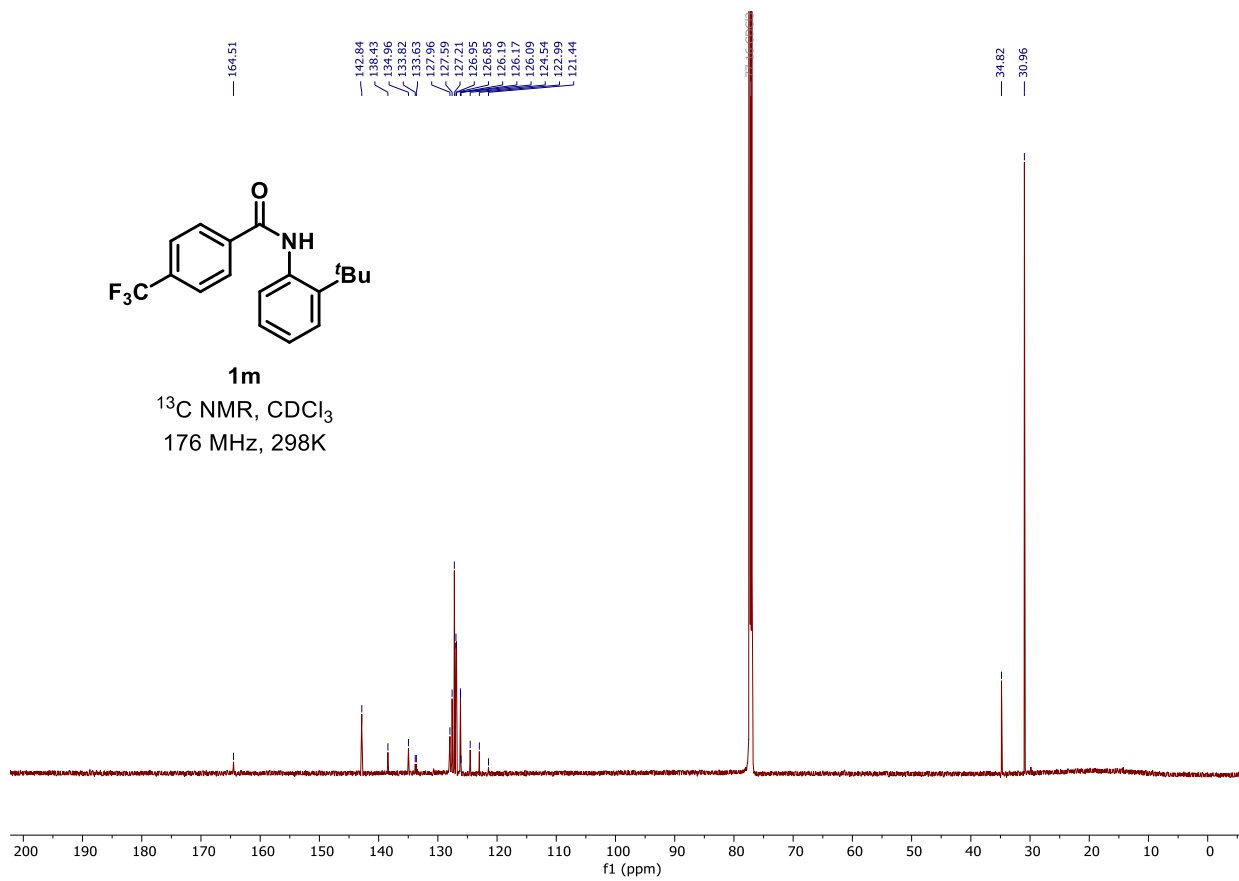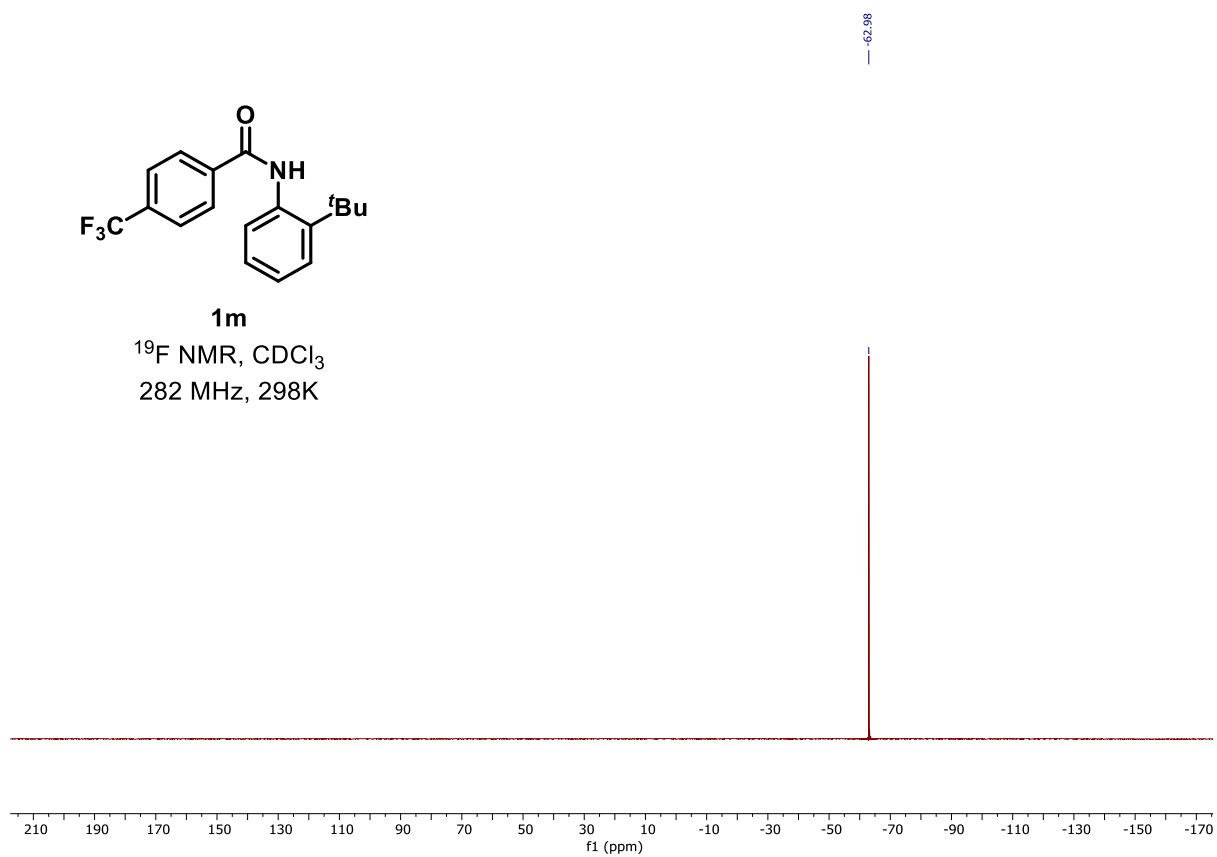

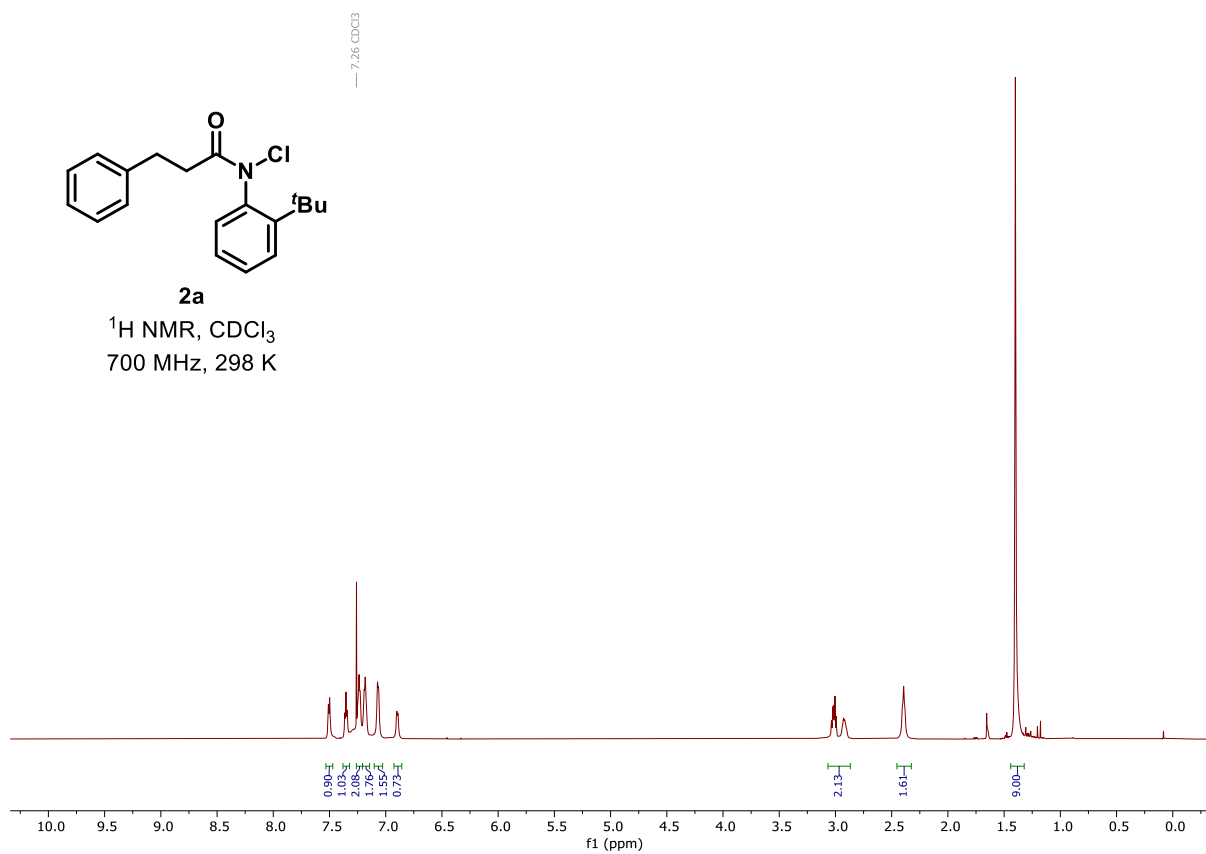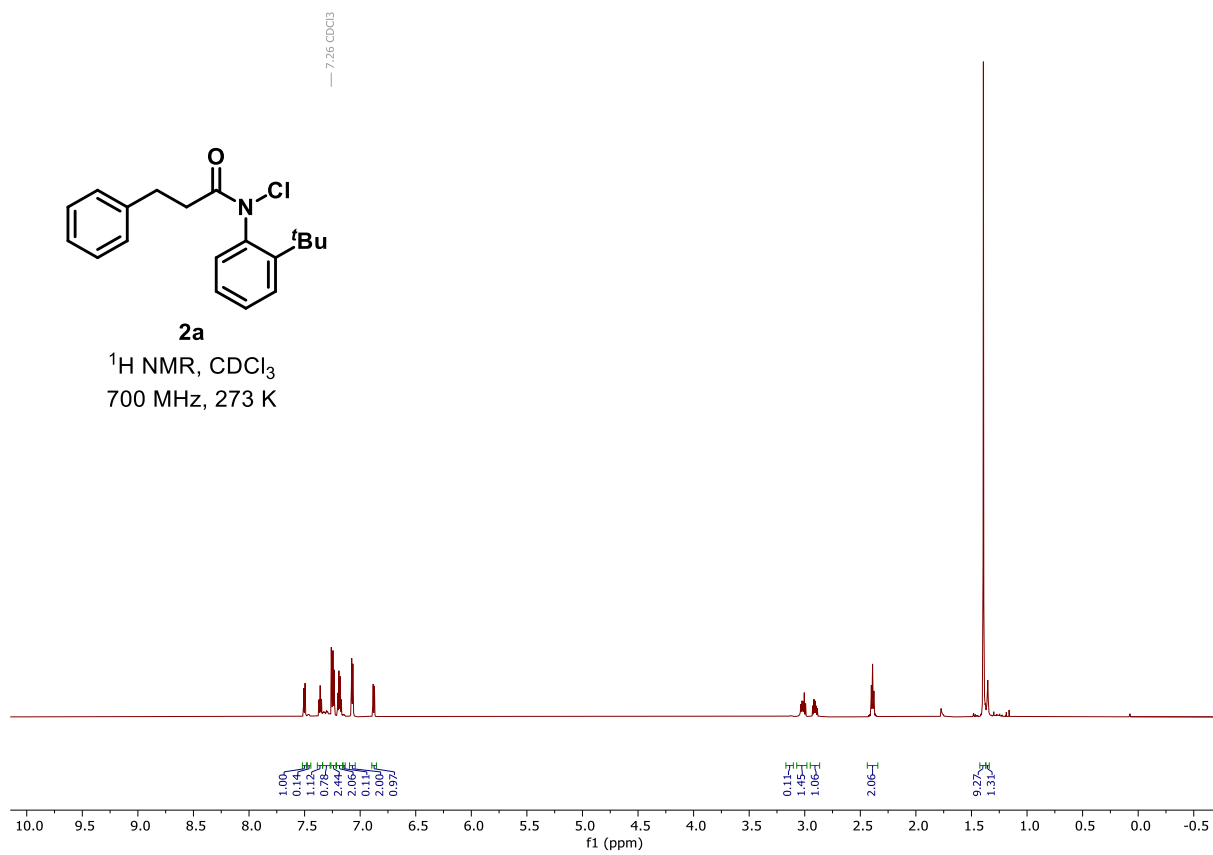

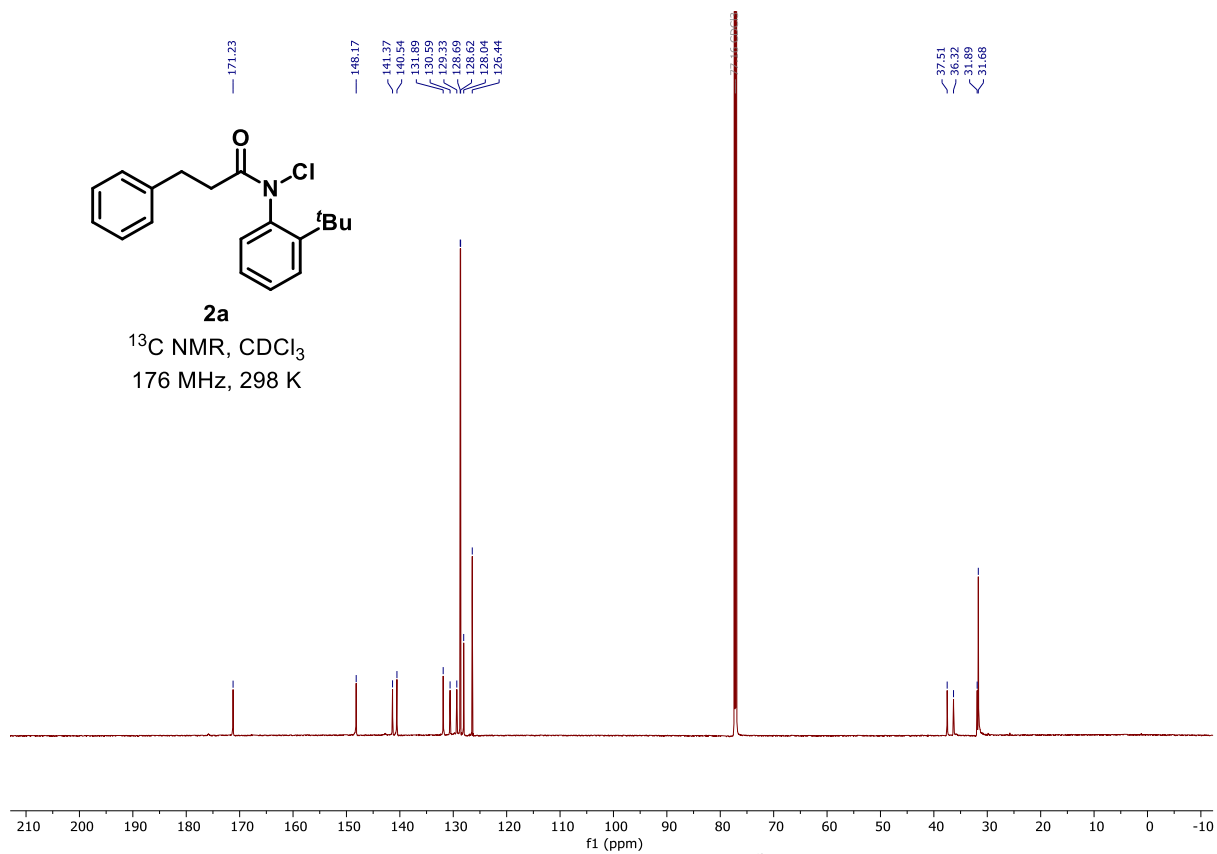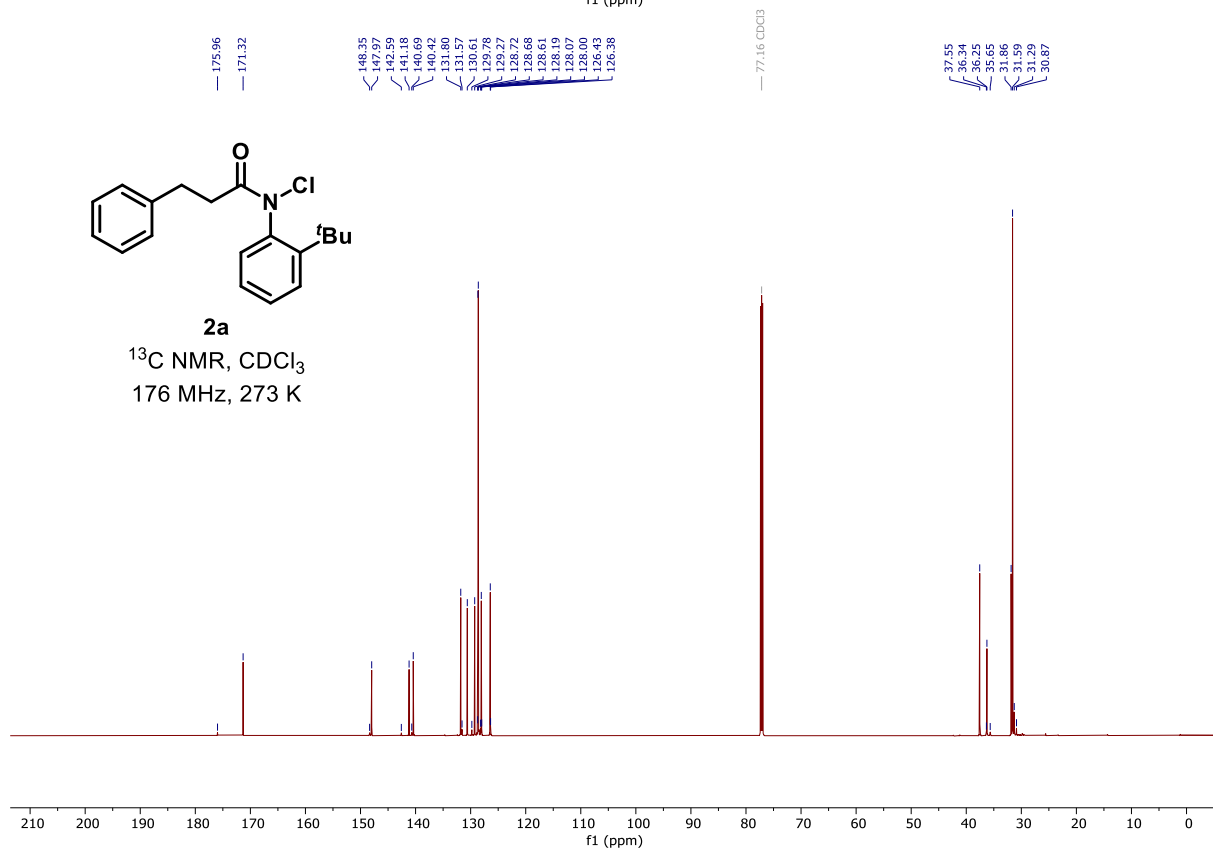



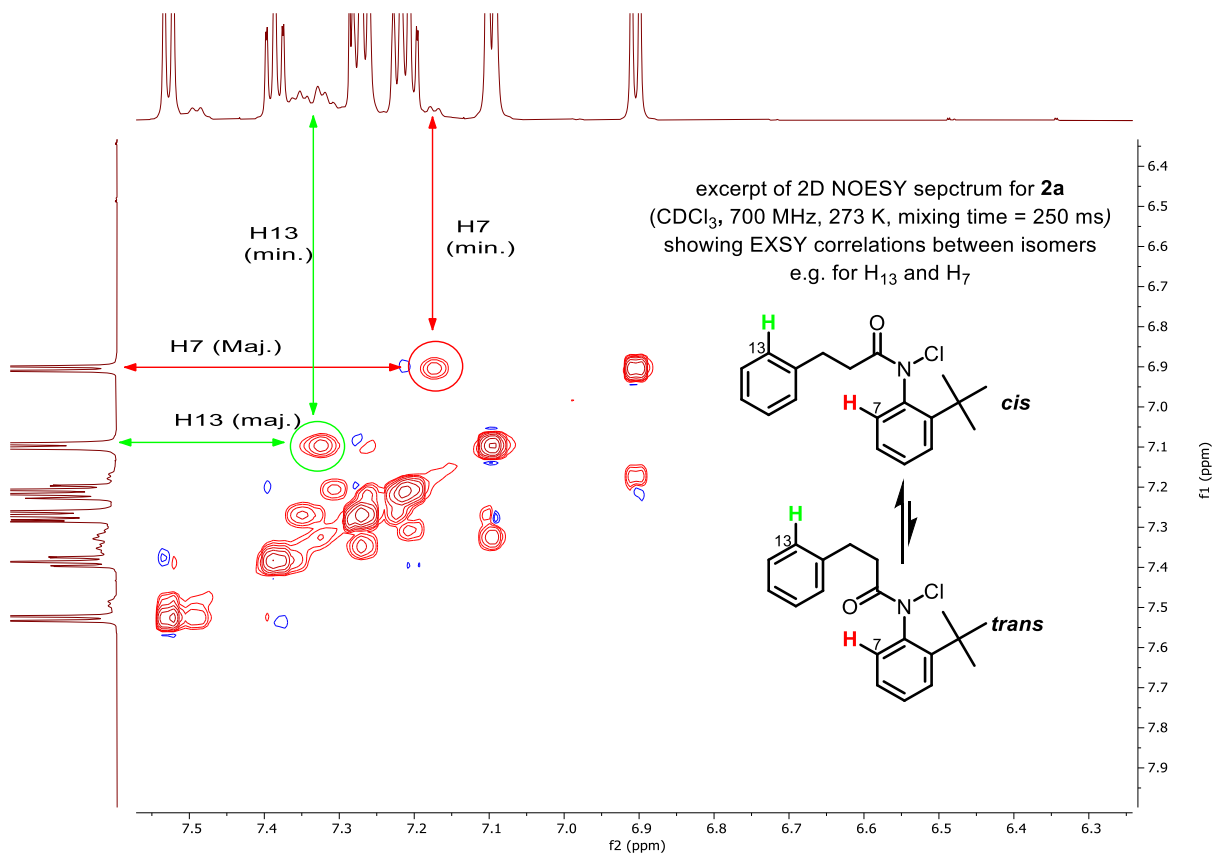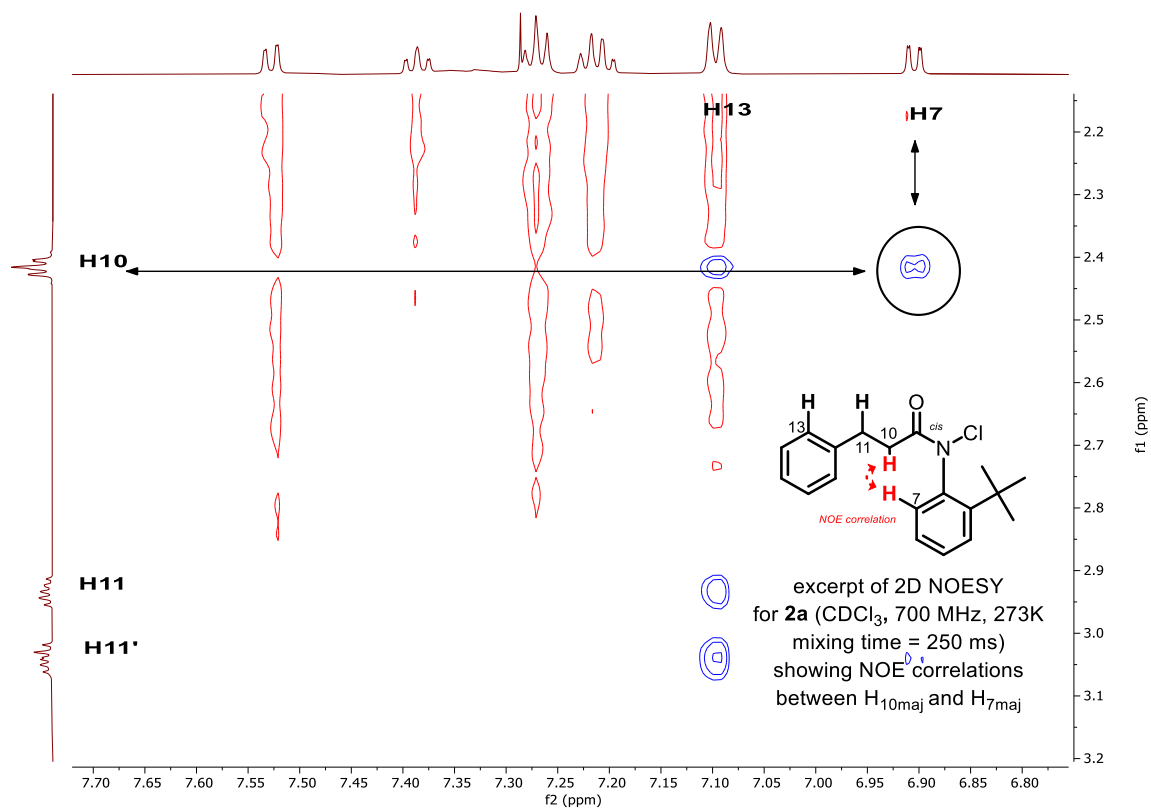

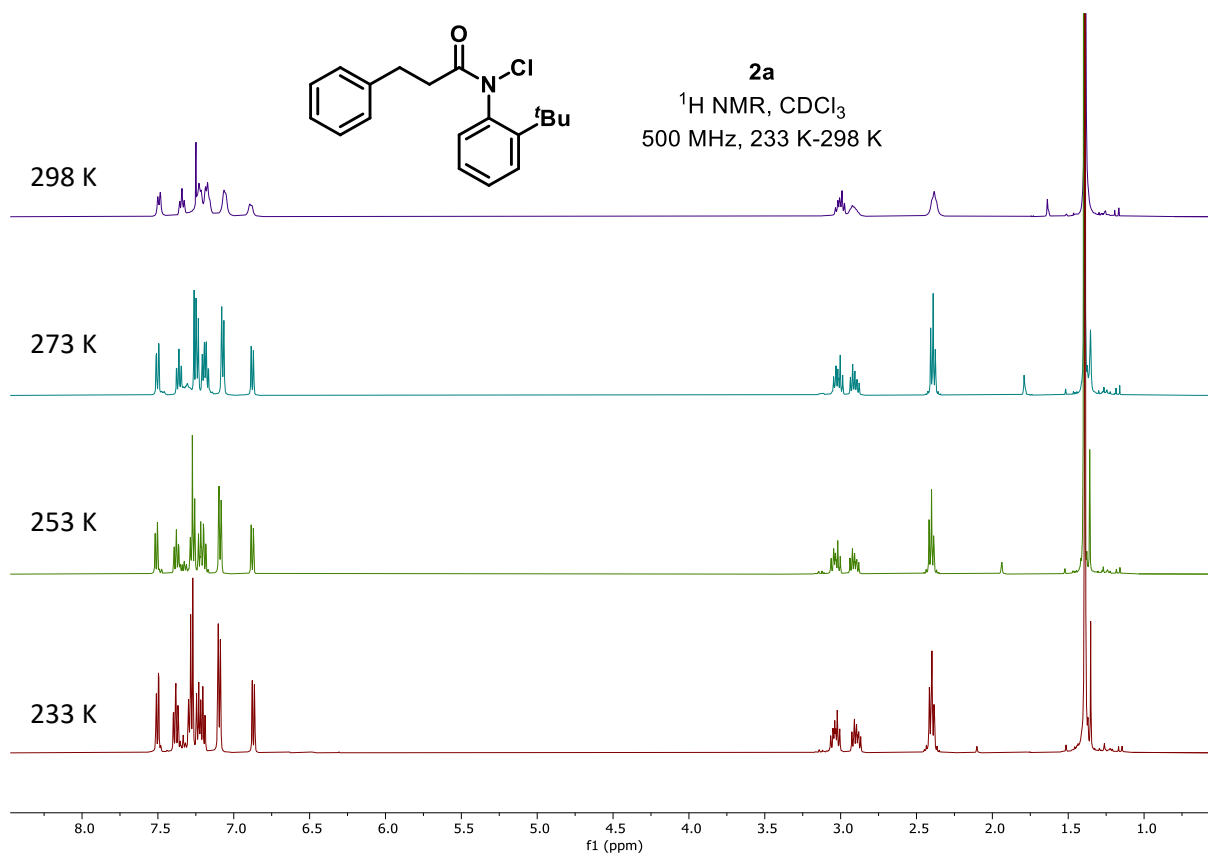

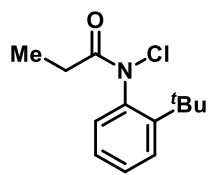

**2b**

<sup>1</sup>H NMR, CDCl<sub>3</sub>  
300 MHz, 298 K

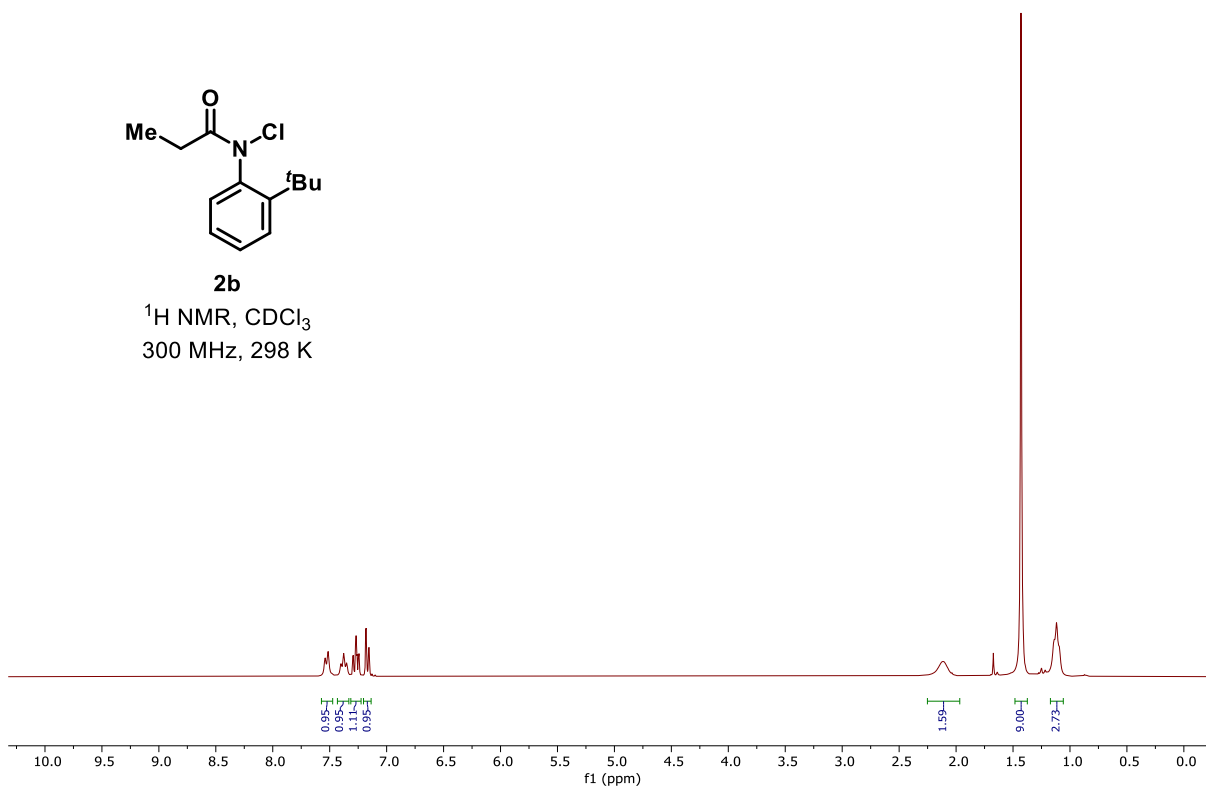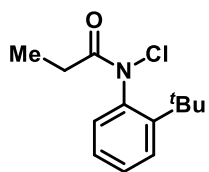

**2b**

<sup>1</sup>H NMR CDCl<sub>3</sub>,  
500 MHz, 263 K

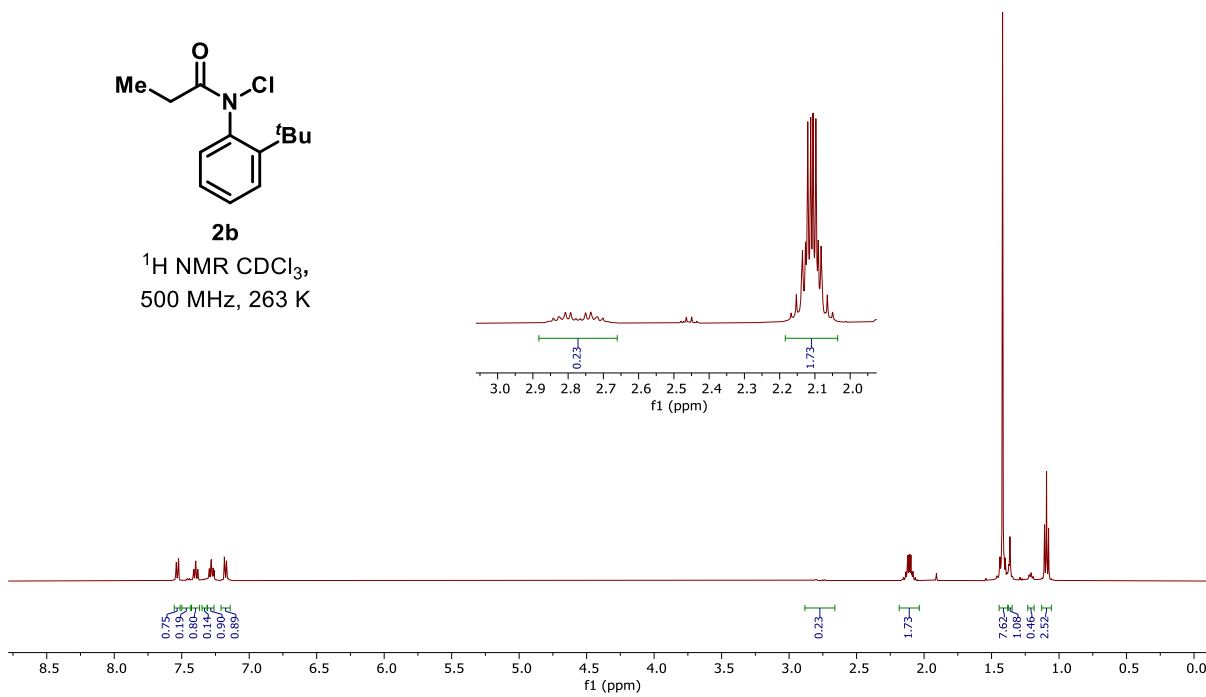

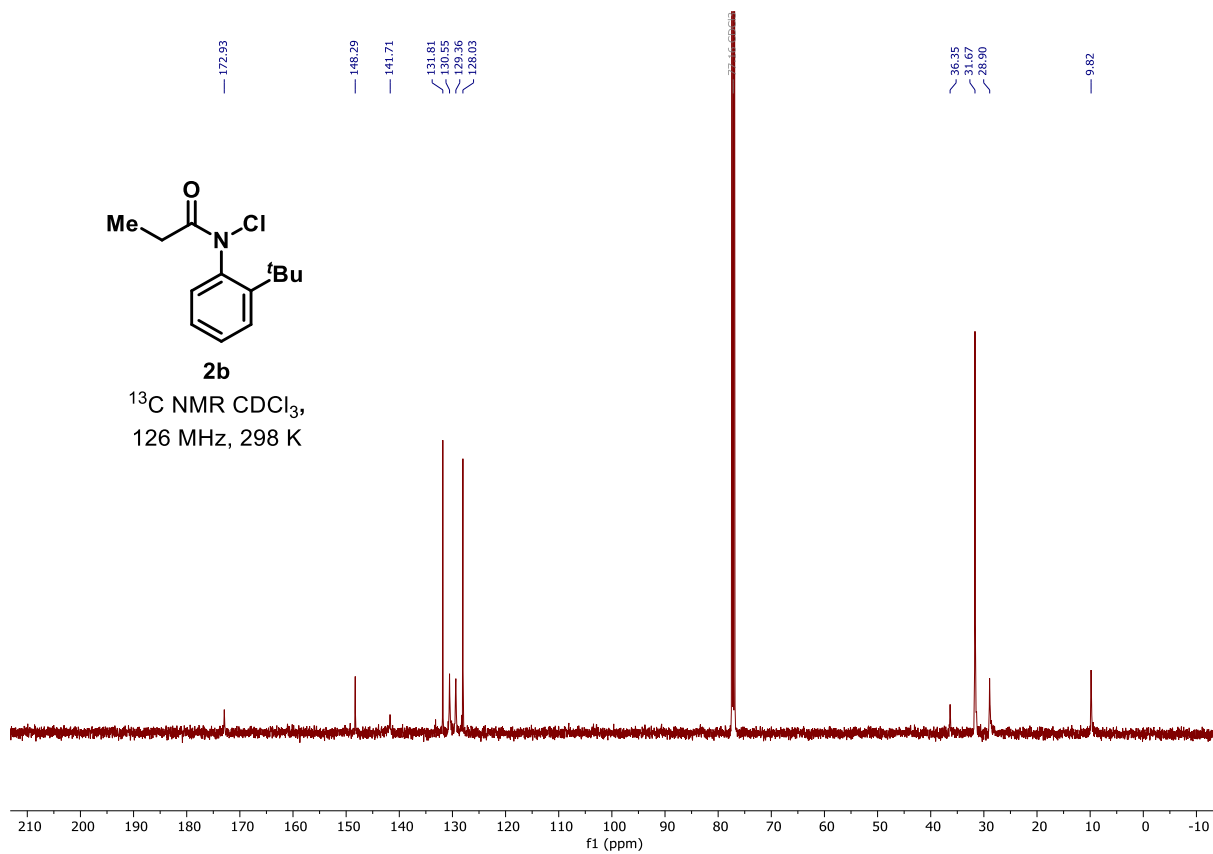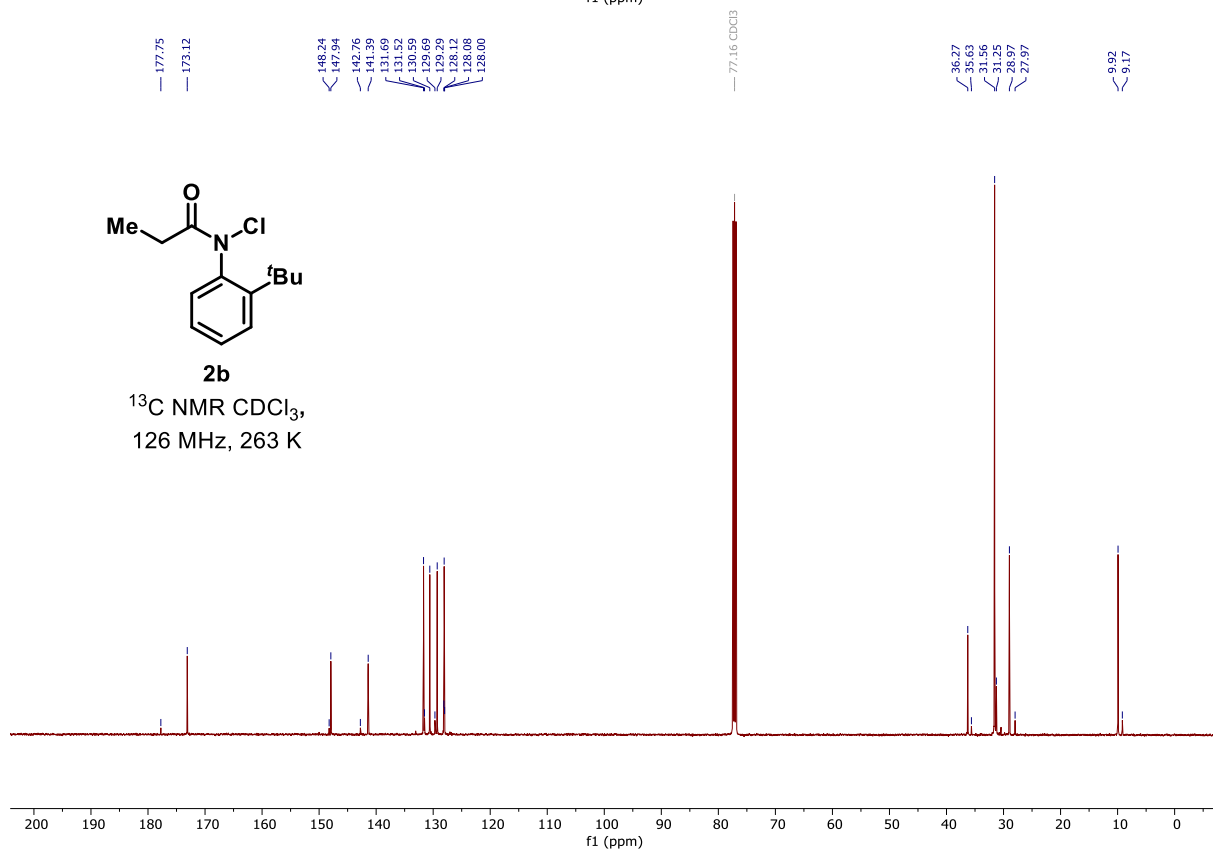

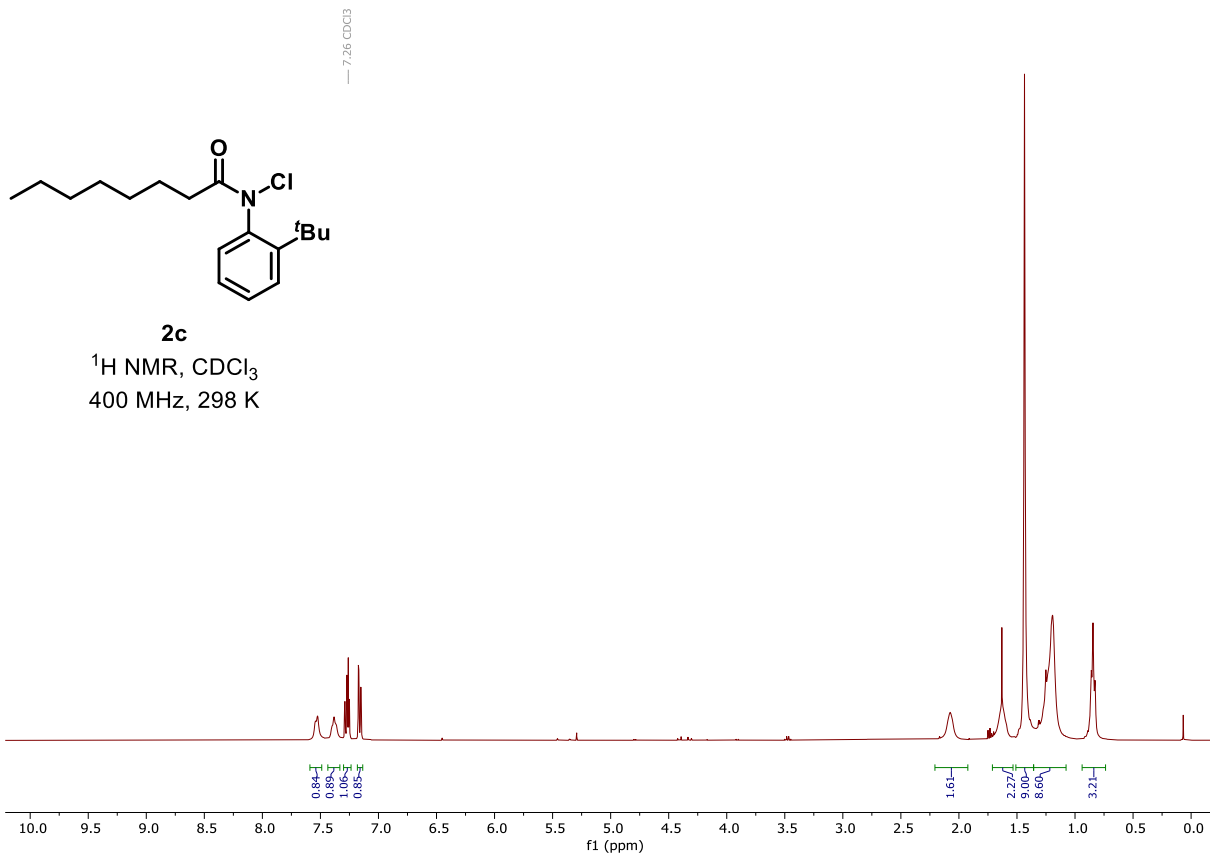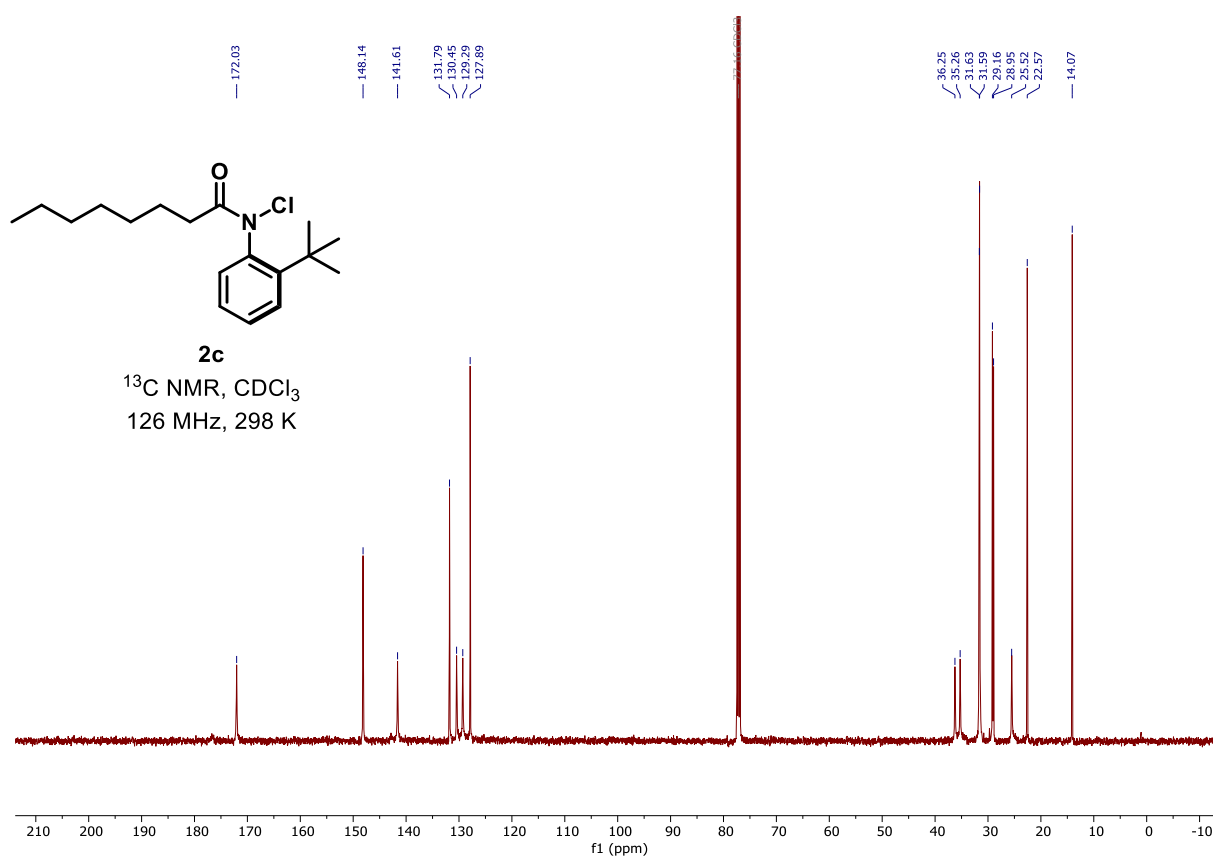

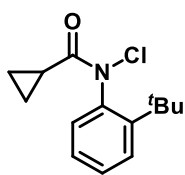

**2d**

$^1\text{H}$  NMR,  $\text{CDCl}_3$   
300 MHz, 298 K

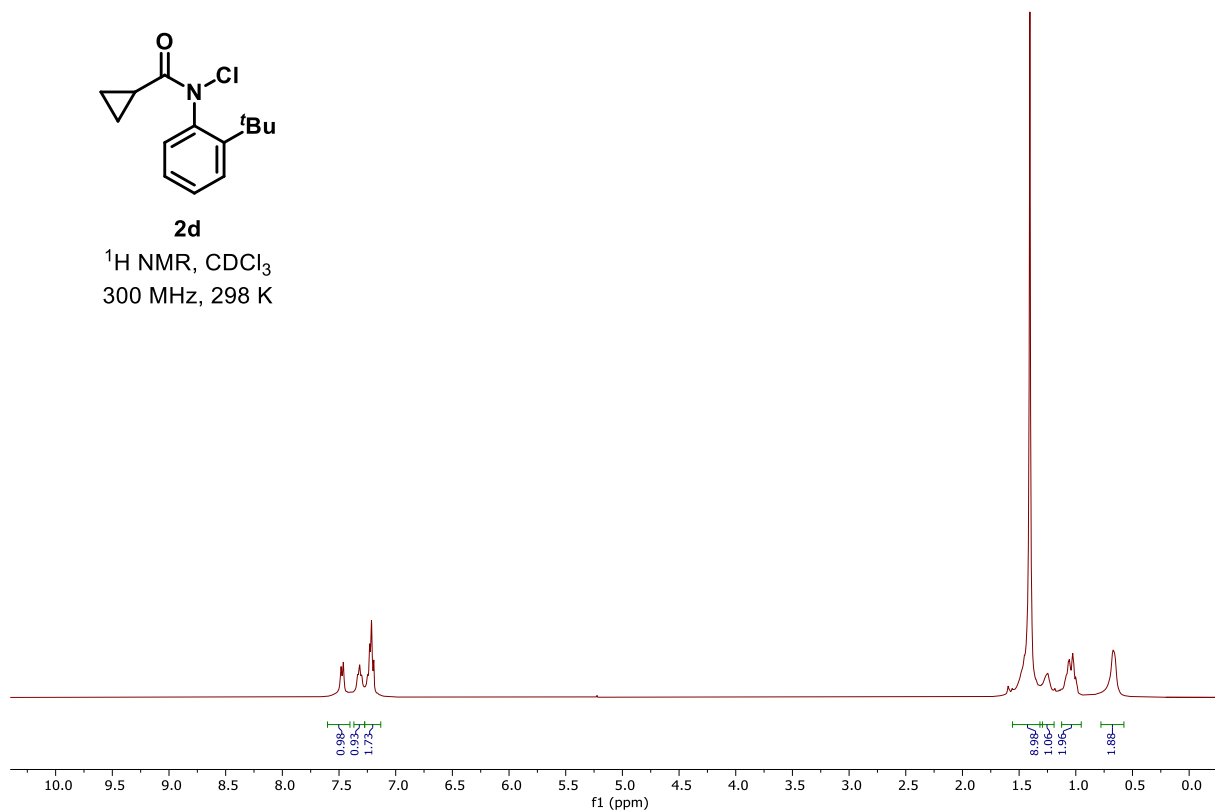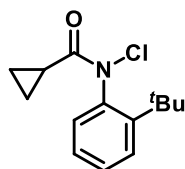

**2d**

$^{13}\text{C}$  NMR,  $\text{CDCl}_3$   
75 MHz, 298 K

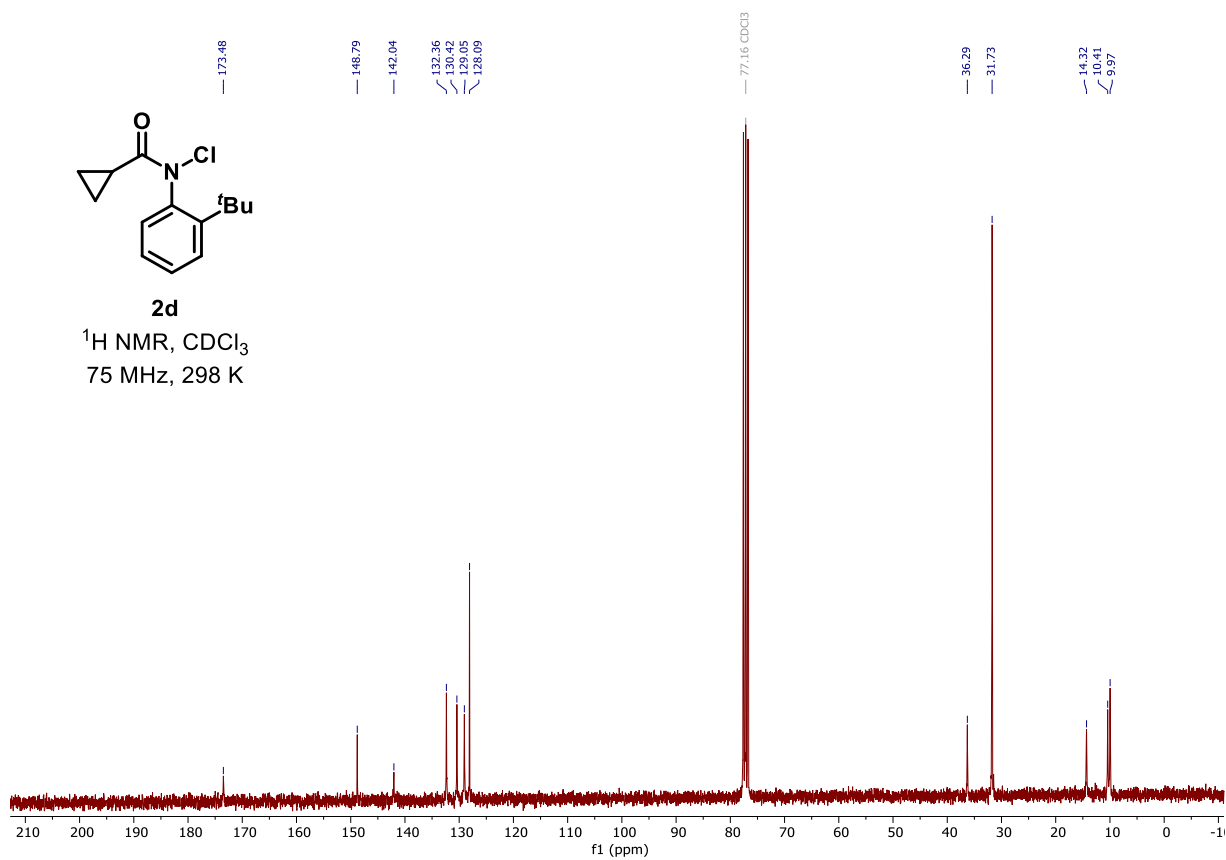

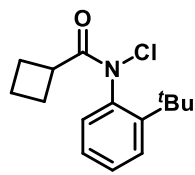

**2e**

$^1\text{H}$  NMR,  $\text{CDCl}_3$   
300 MHz, 298 K

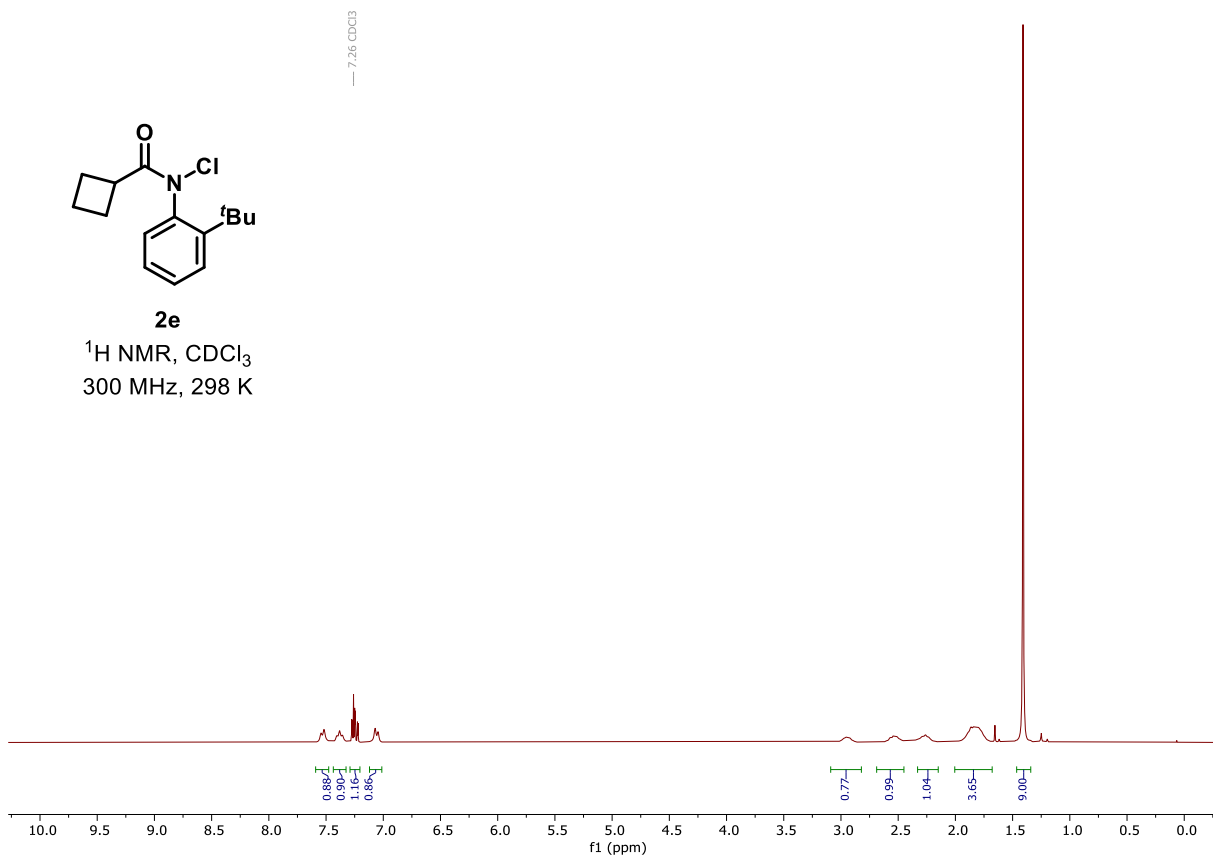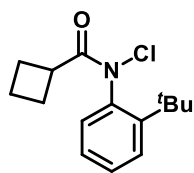

**2e**

$^{13}\text{C}$  NMR,  $\text{CDCl}_3$   
75 MHz, 298 K

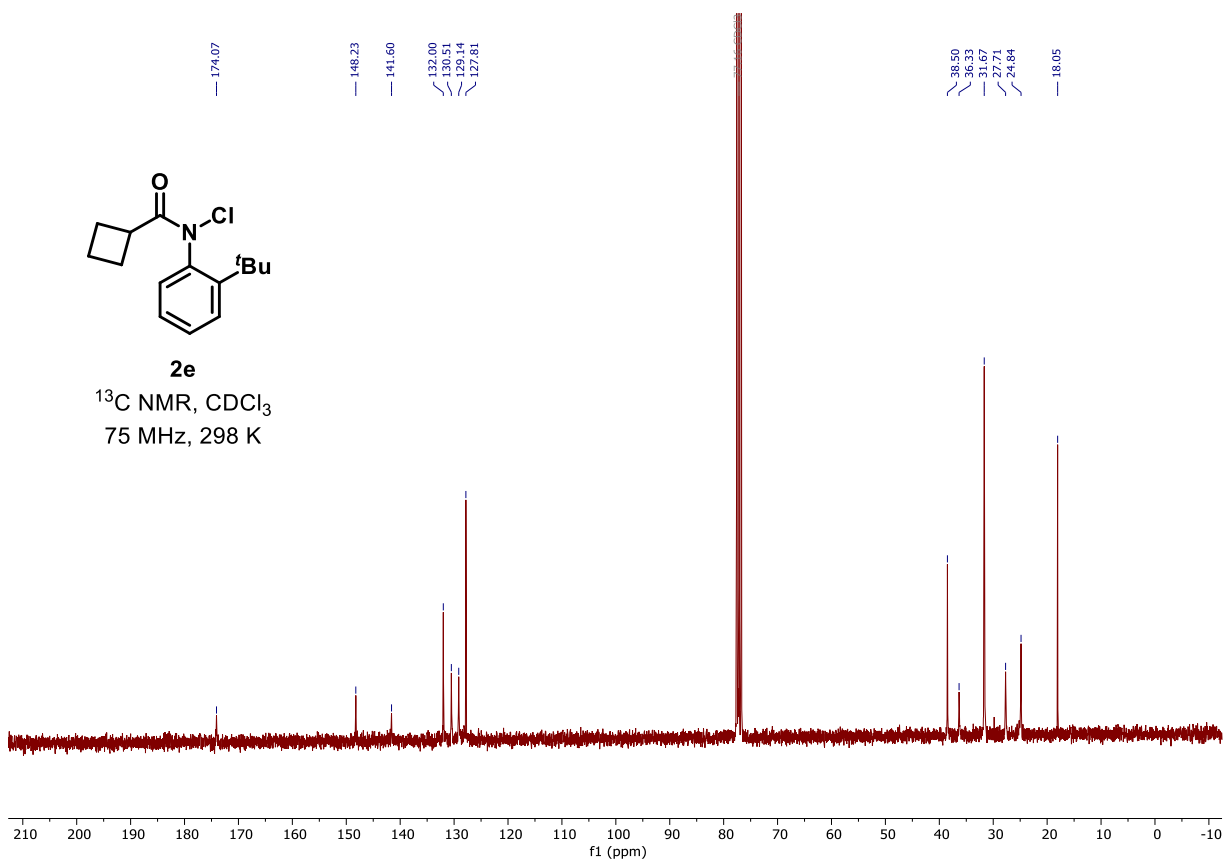

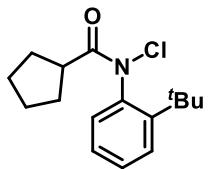

**2f**

$^1\text{H}$  NMR,  $\text{CDCl}_3$   
300 MHz, 298 K

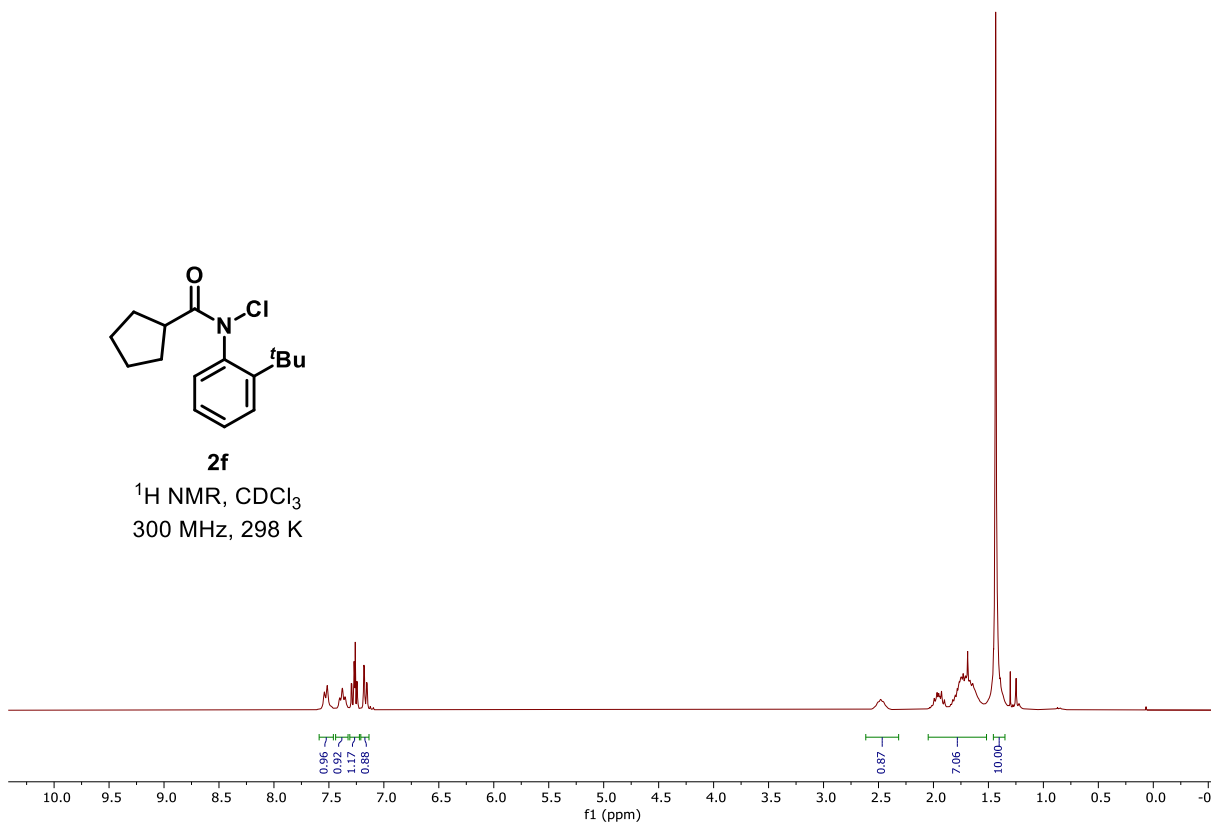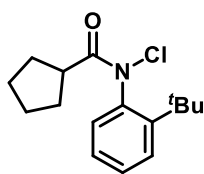

**2f**

$^{13}\text{C}$  NMR,  $\text{CDCl}_3$   
75 MHz, 298 K

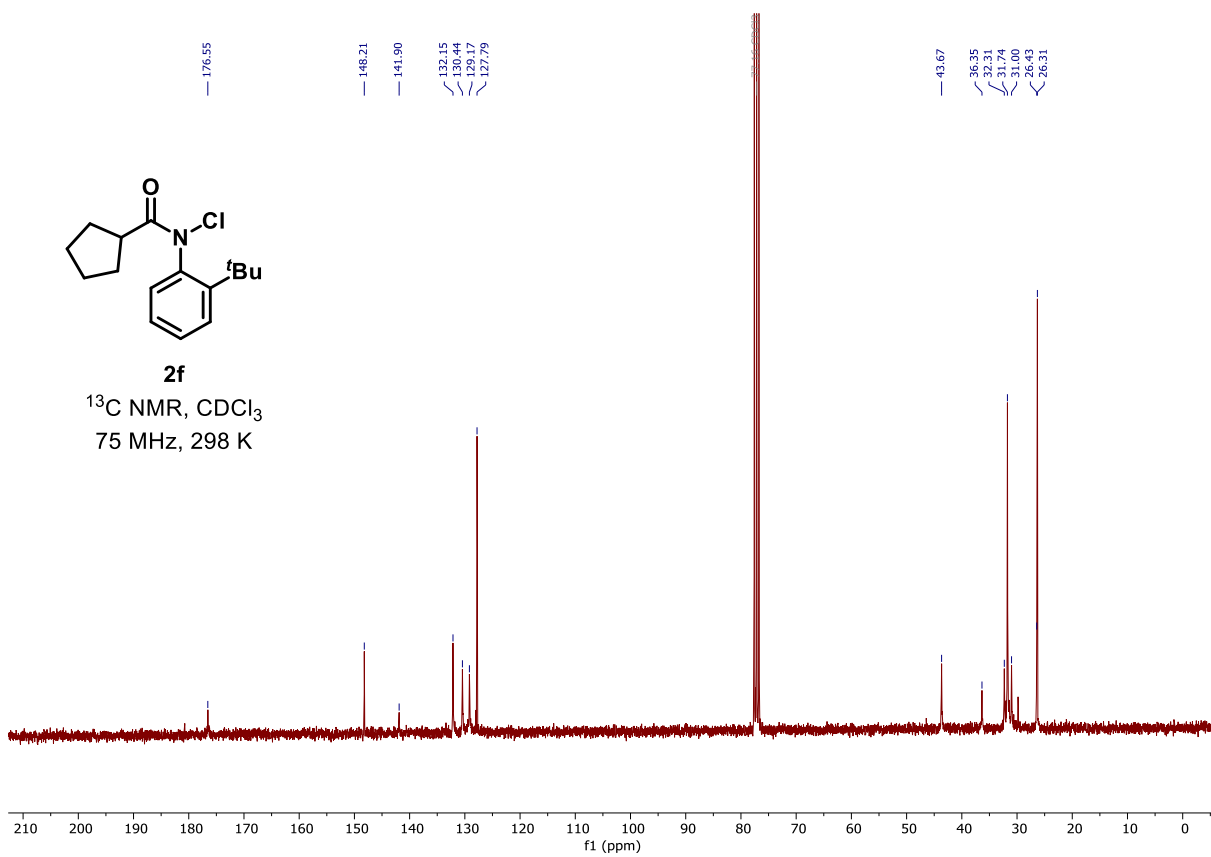



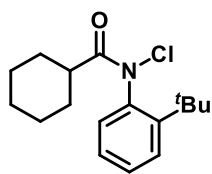

**2g**

<sup>1</sup>H NMR, CDCl<sub>3</sub>  
300 MHz, 298 K

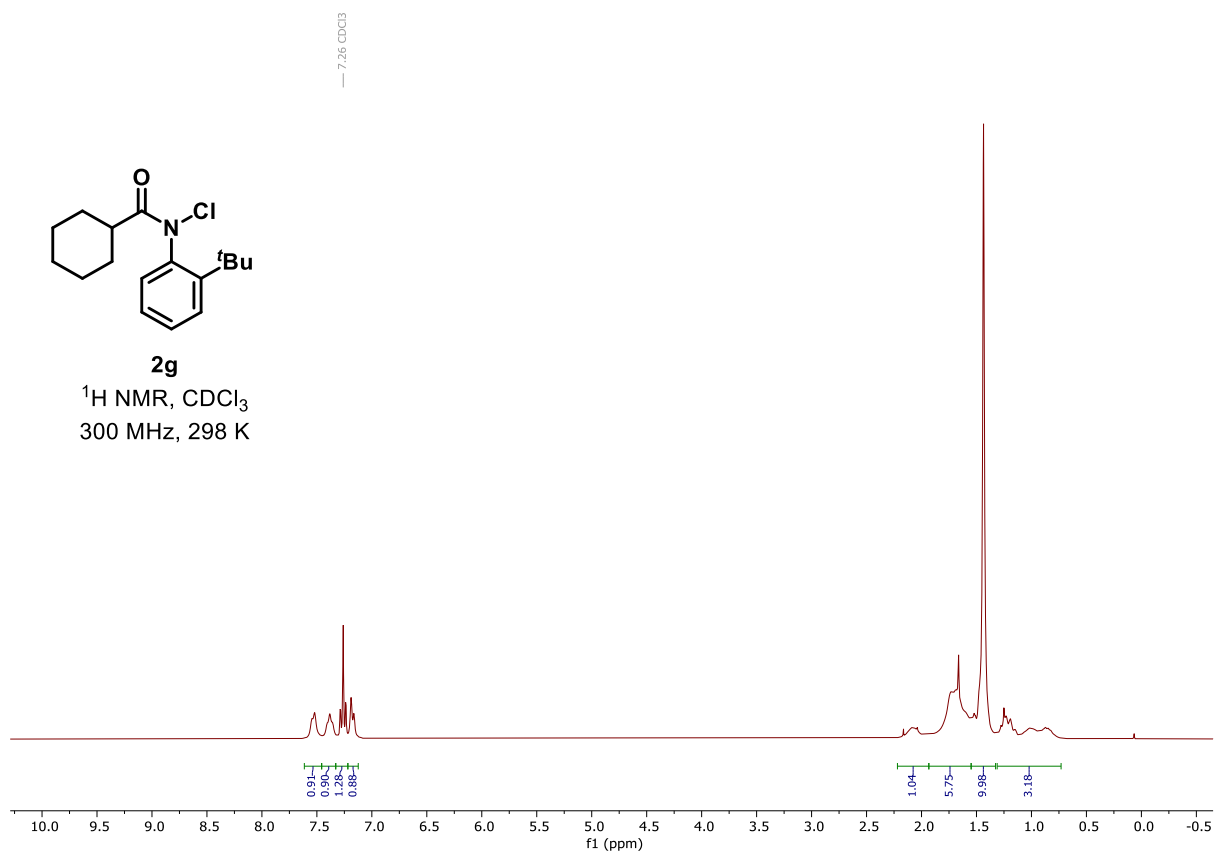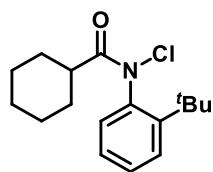

**2g**

<sup>13</sup>C NMR, CDCl<sub>3</sub>  
75 MHz, 298 K

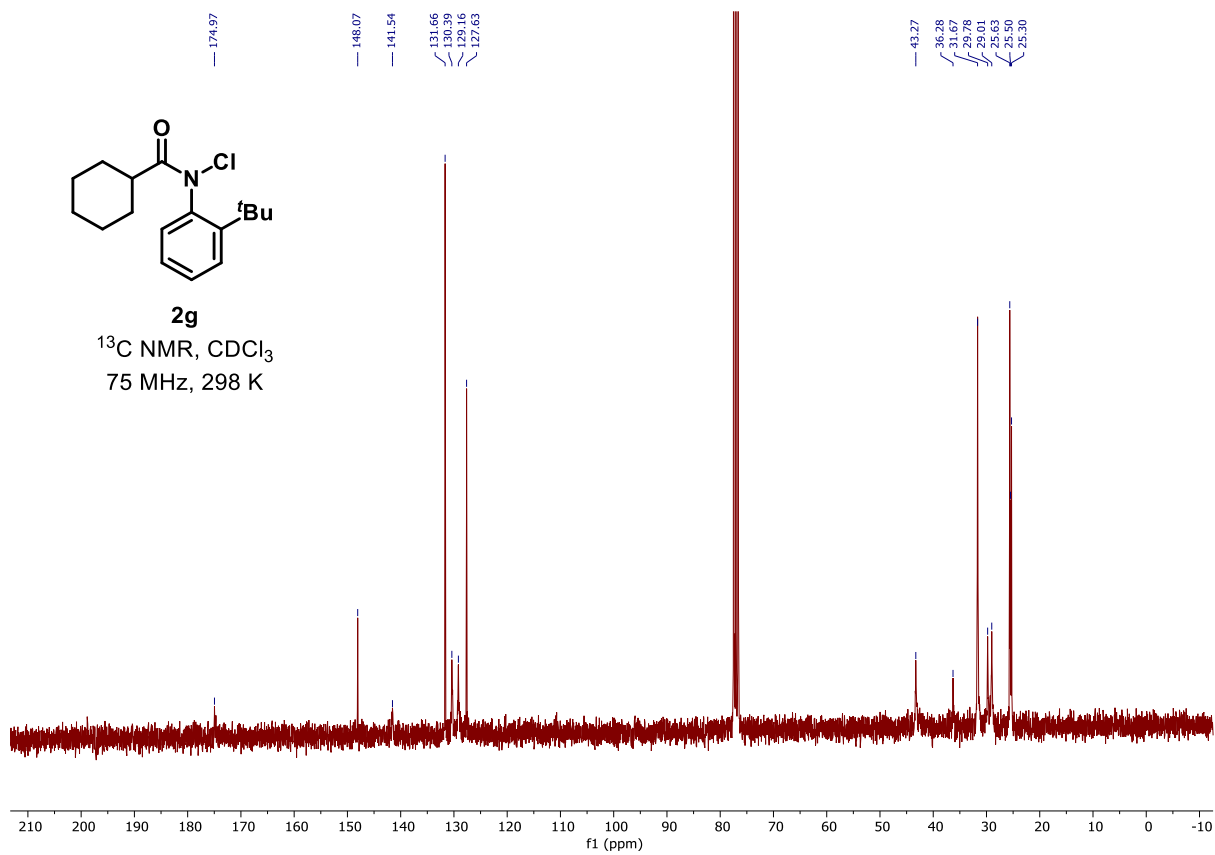

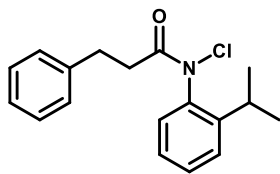

**2h**

<sup>1</sup>H NMR, CDCl<sub>3</sub>  
400 MHz, 298K

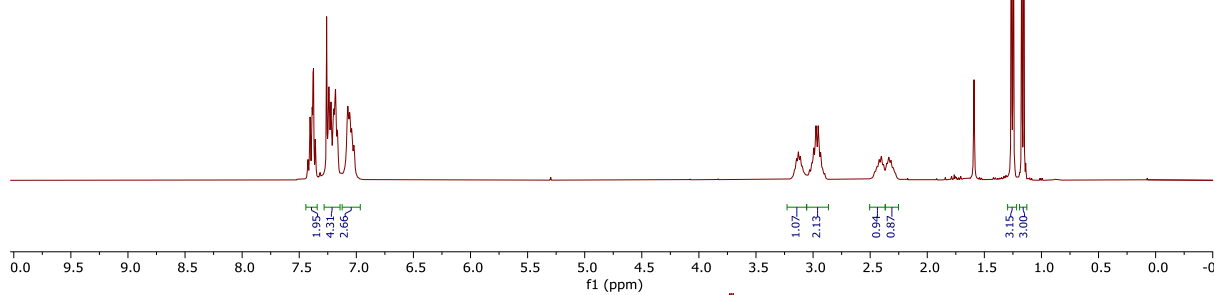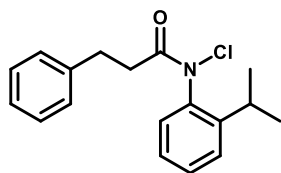

**2h**

<sup>13</sup>C NMR, CDCl<sub>3</sub>  
101 MHz, 298K

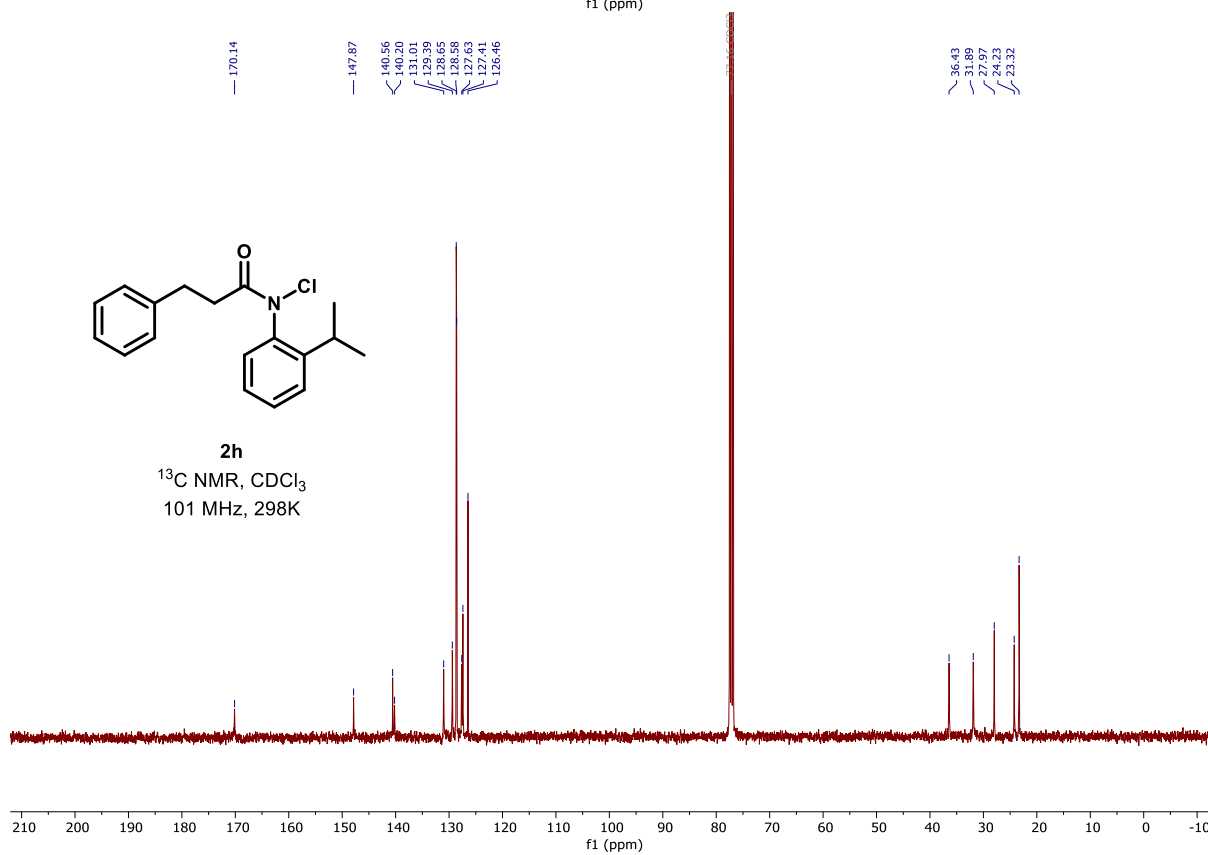

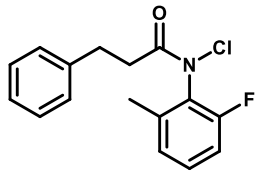

2i

$^1\text{H NMR}$ ,  $\text{CDCl}_3$   
400 MHz, 298K

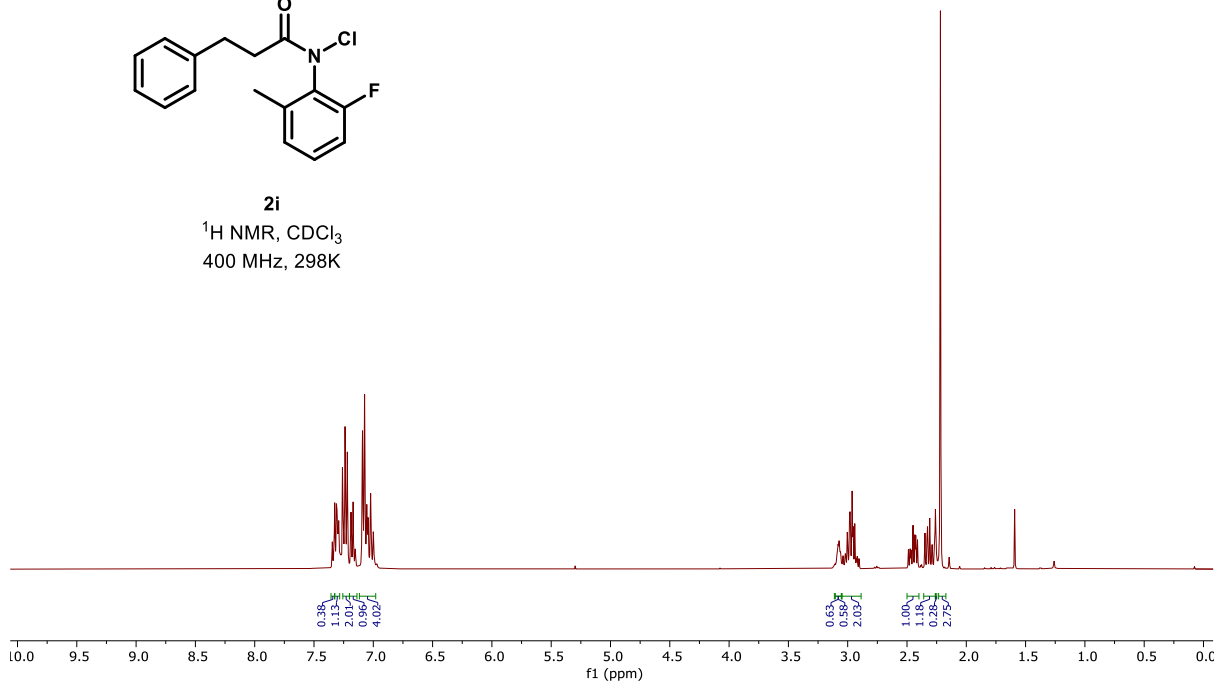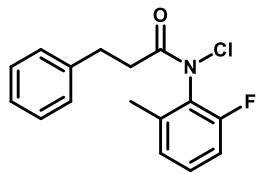

2i

$^{13}\text{C NMR}$ ,  $\text{CDCl}_3$   
101 MHz, 298K

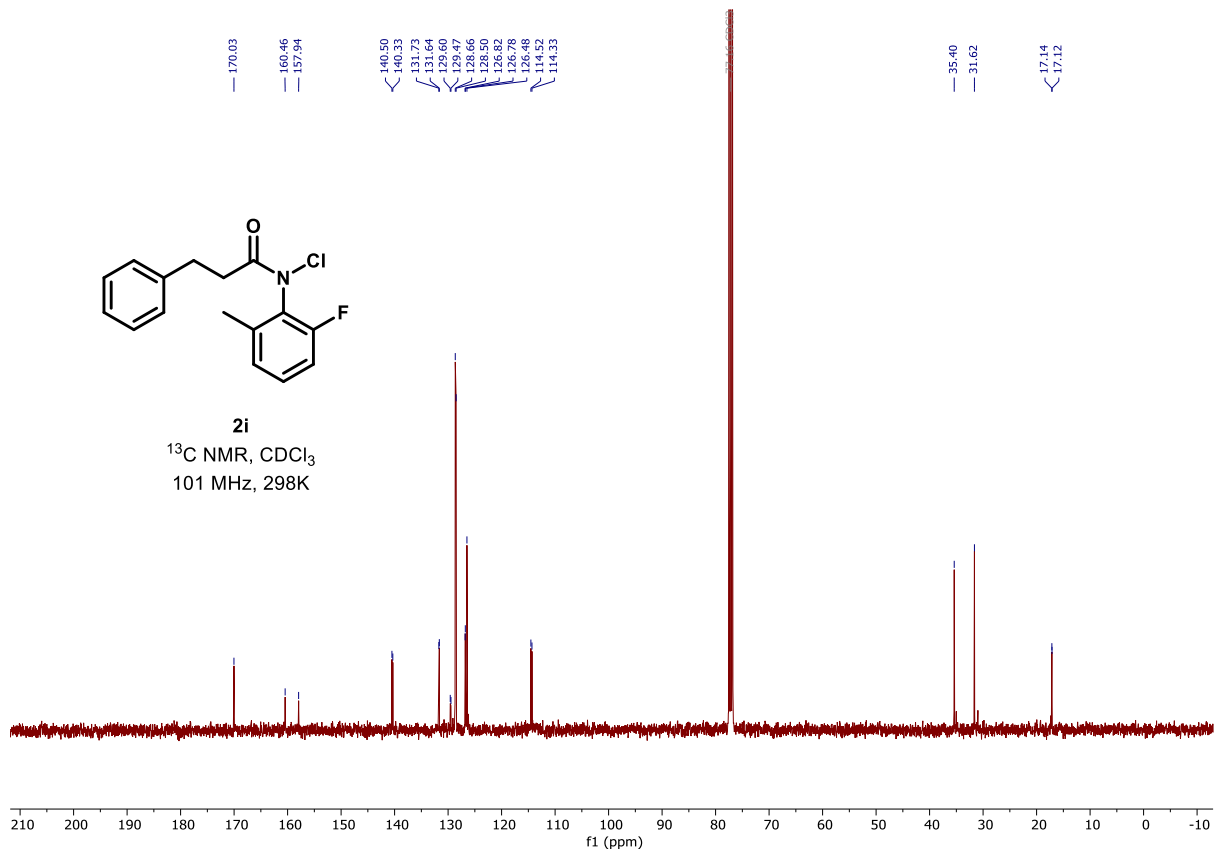

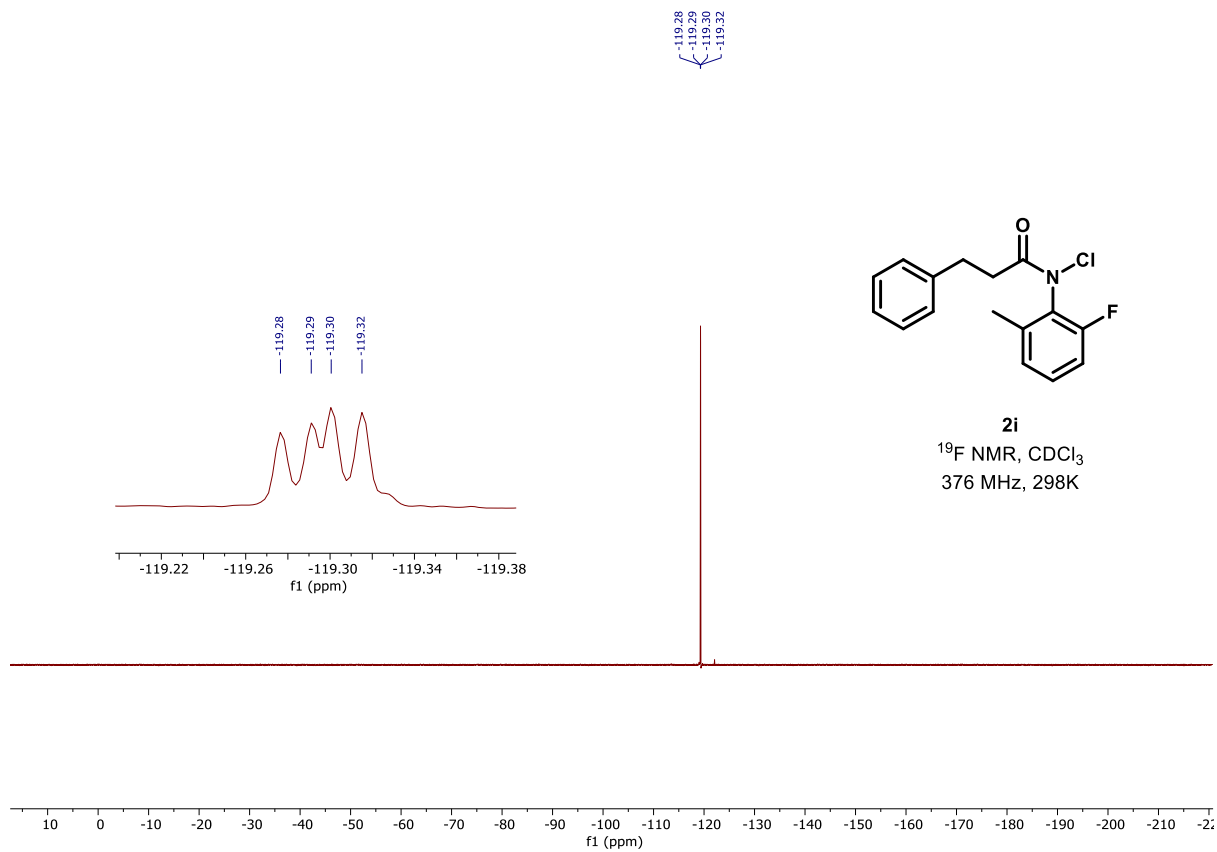

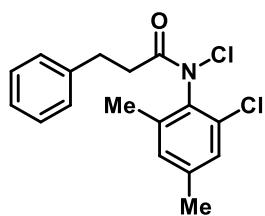

2j

$^1\text{H NMR}$ ,  $\text{CDCl}_3$   
300 MHz, 298 K

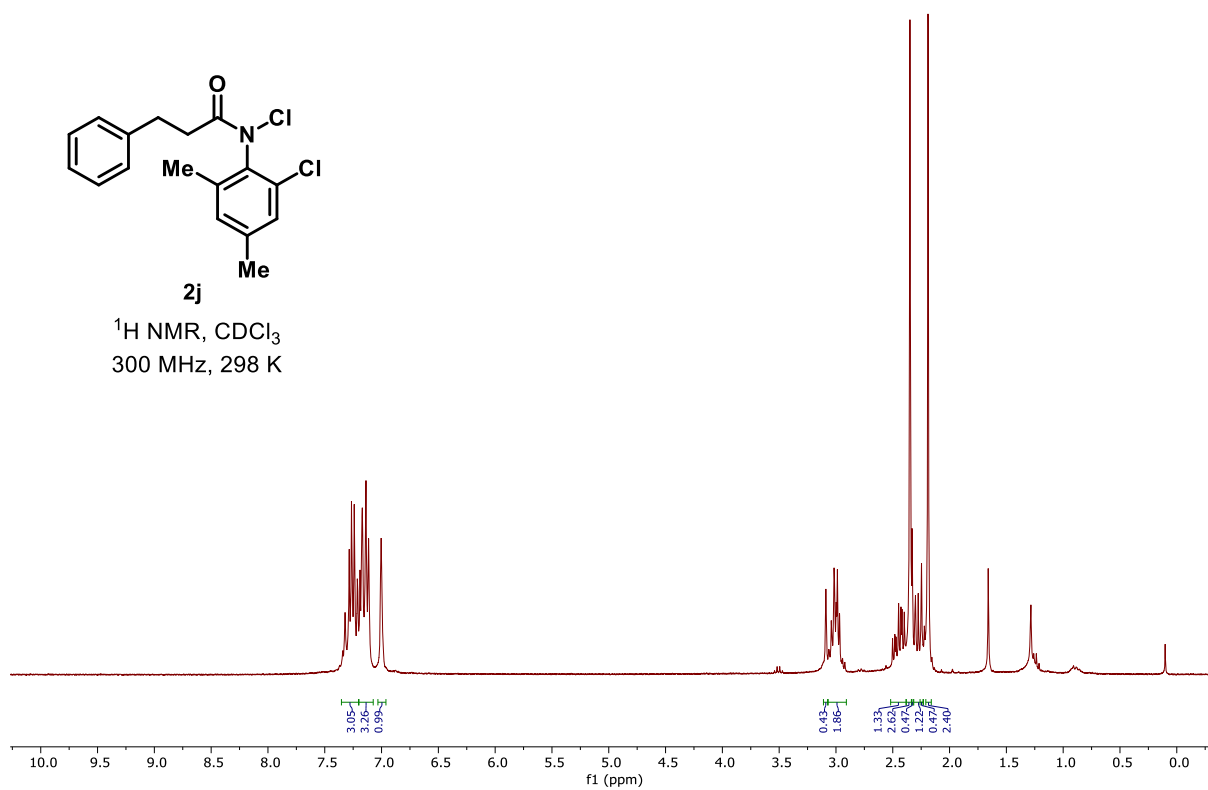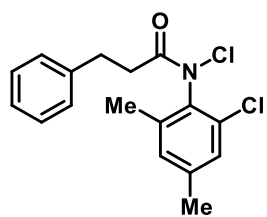

2j

$^{13}\text{C NMR}$ ,  $\text{CDCl}_3$   
75 MHz, 298 K

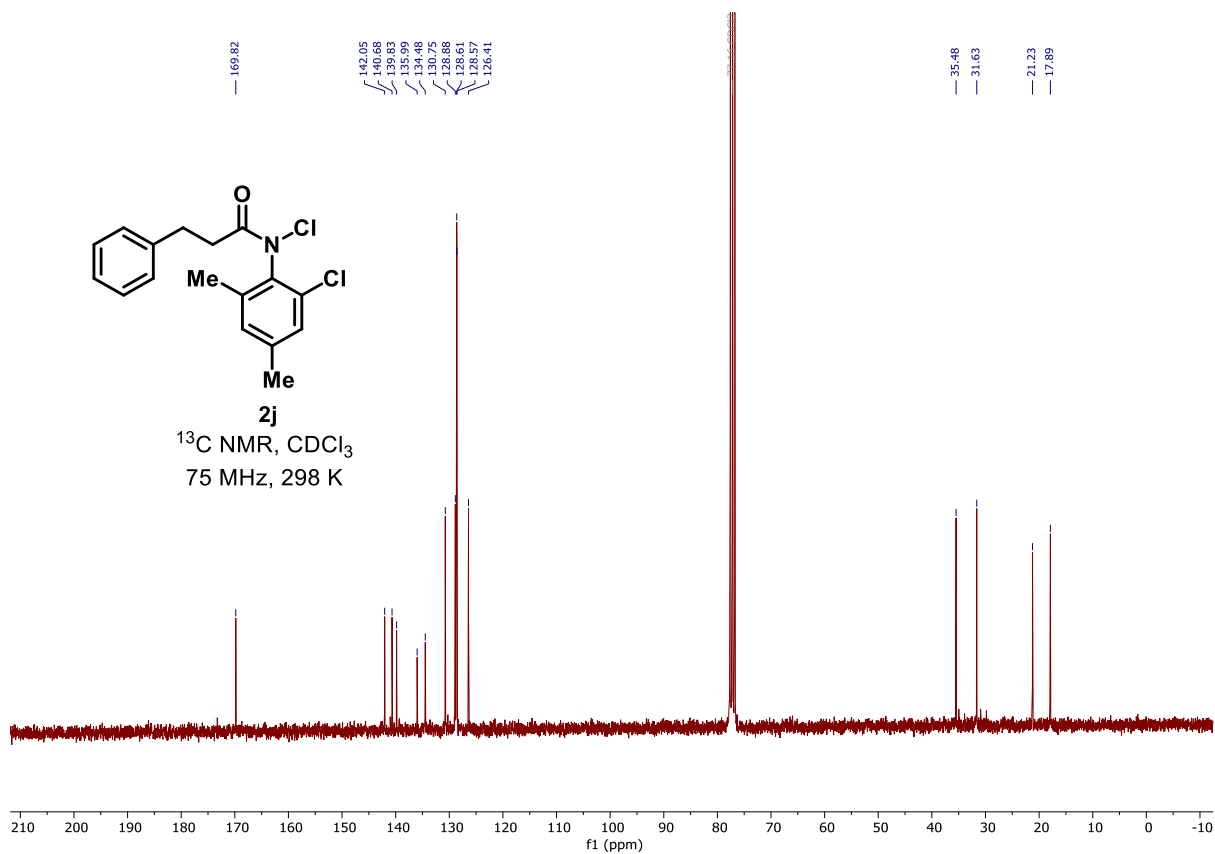

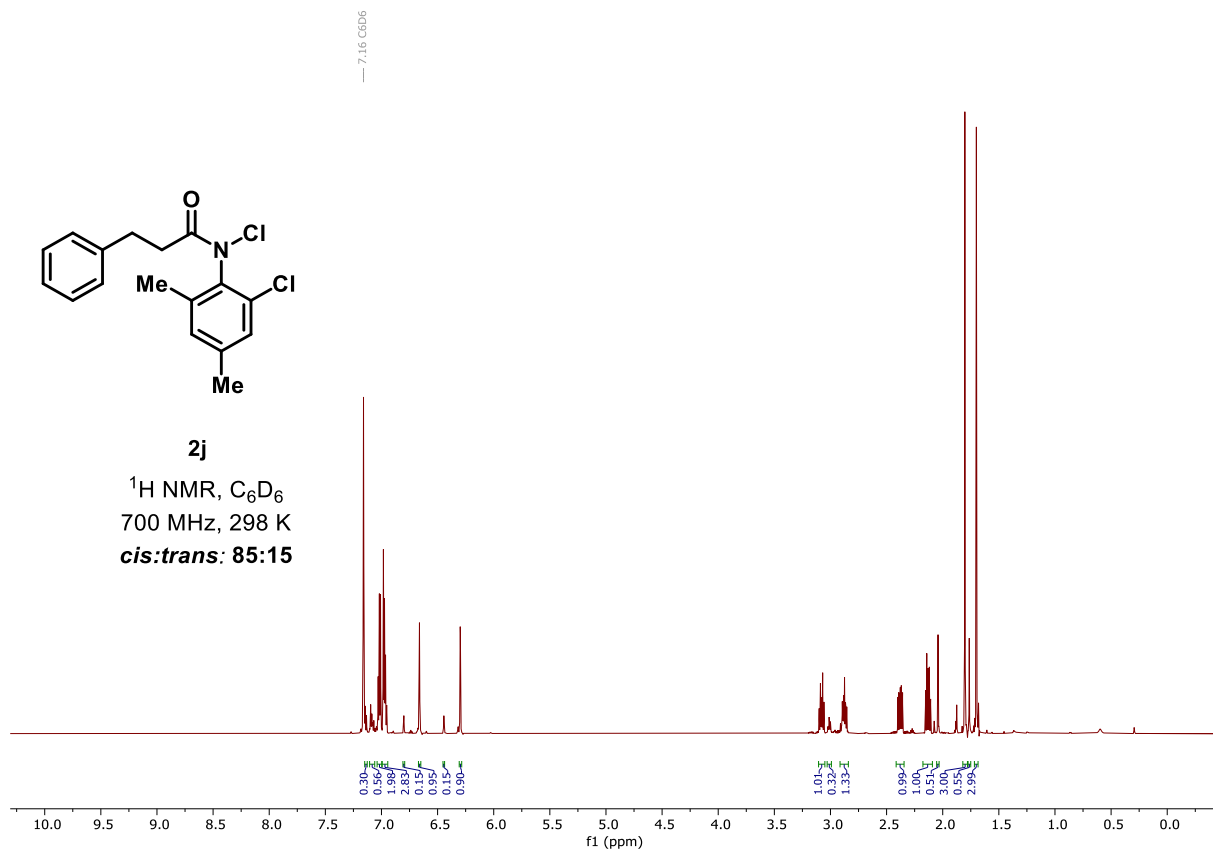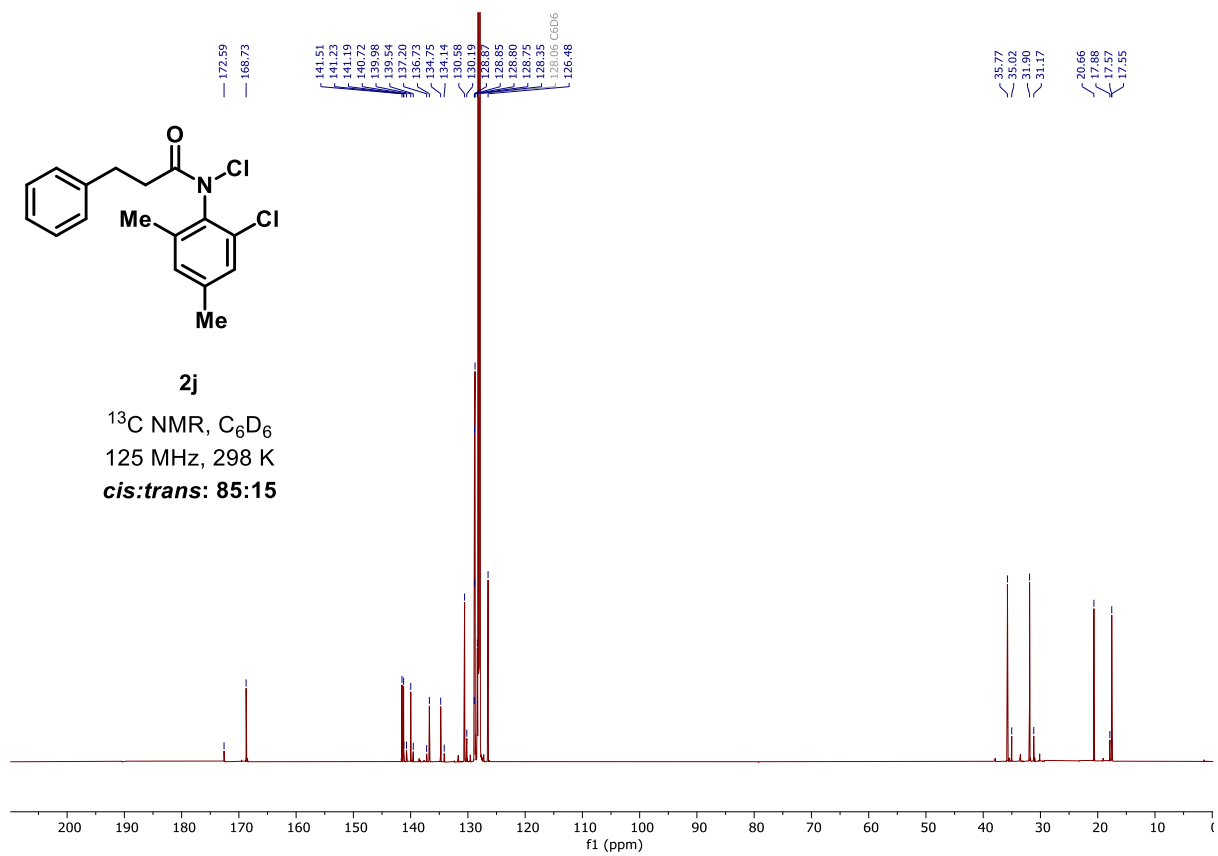

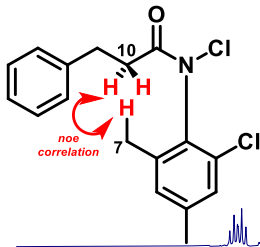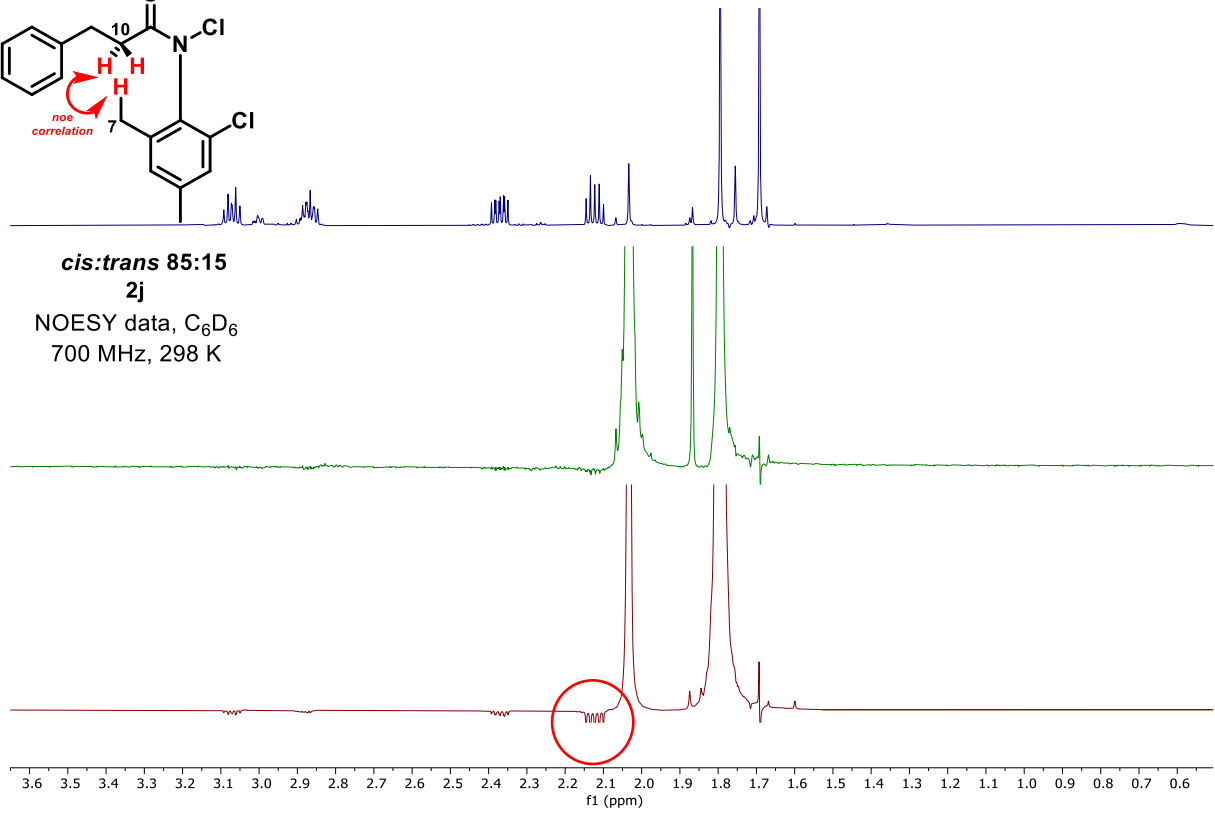

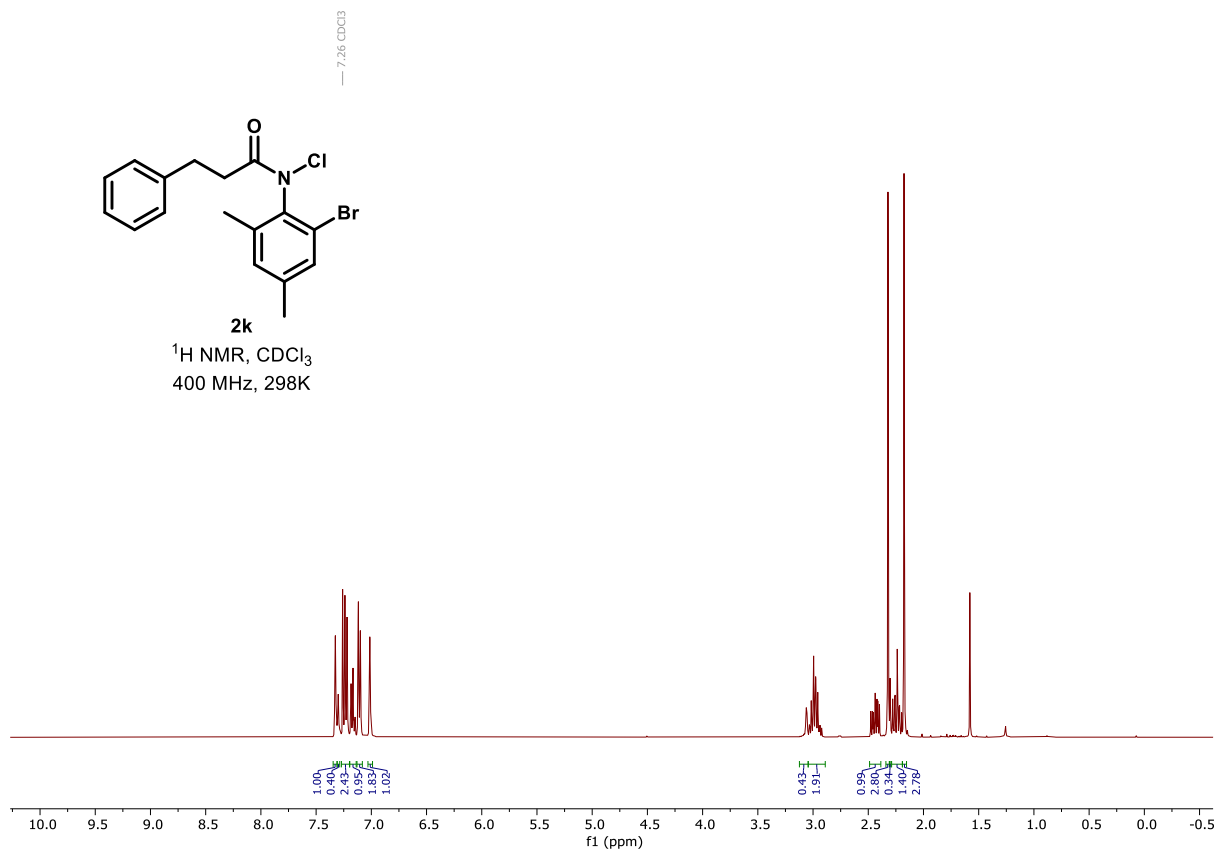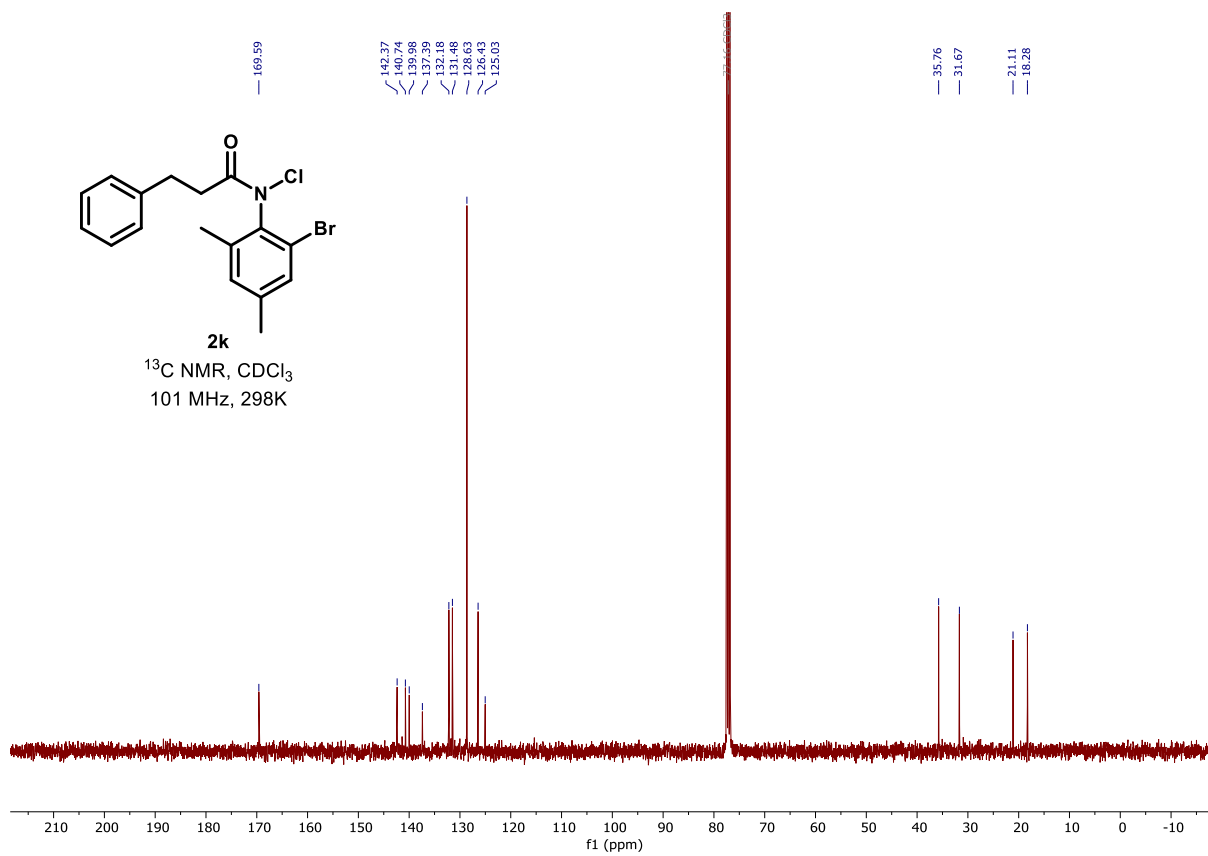



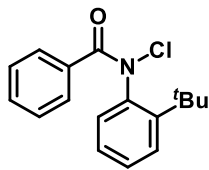

2l

$^1\text{H NMR}$ ,  $\text{CDCl}_3$   
400 MHz, 298 K

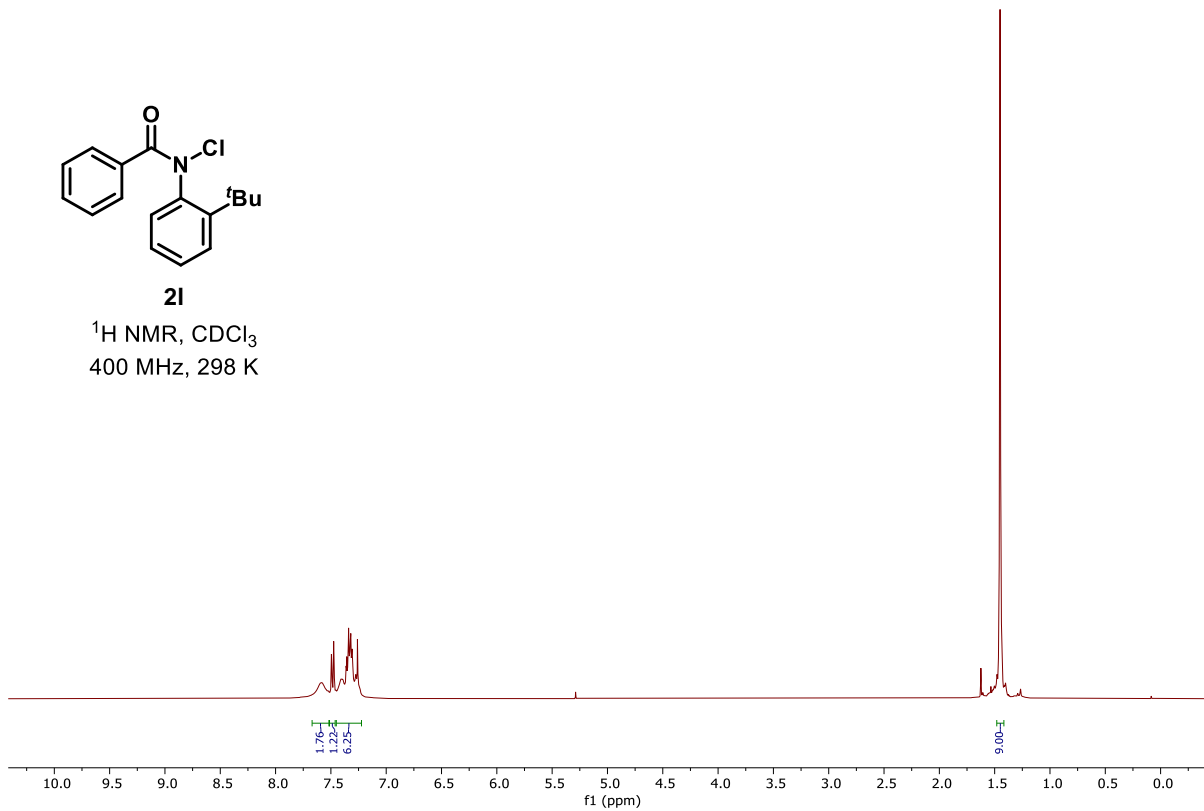

— 7.26  $\text{CDCl}_3$

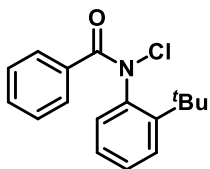

2l

$^1\text{H NMR}$ ,  $\text{CDCl}_3$   
500 MHz, 218K

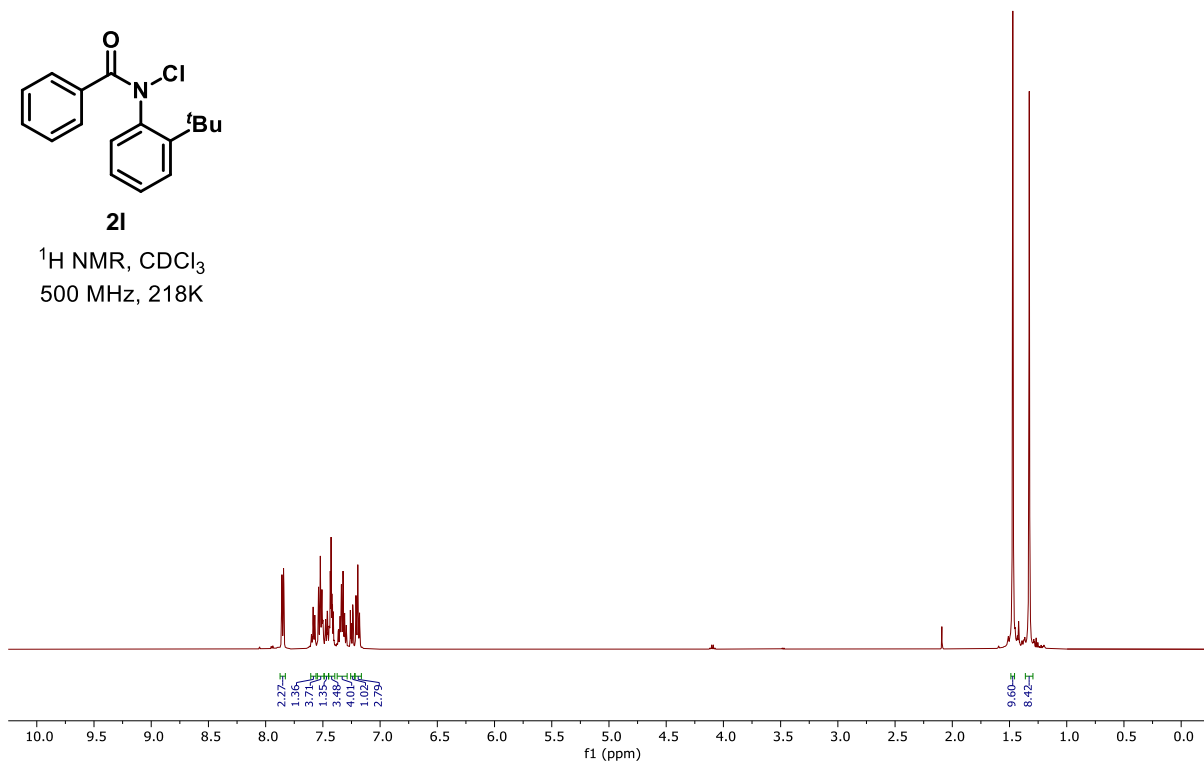

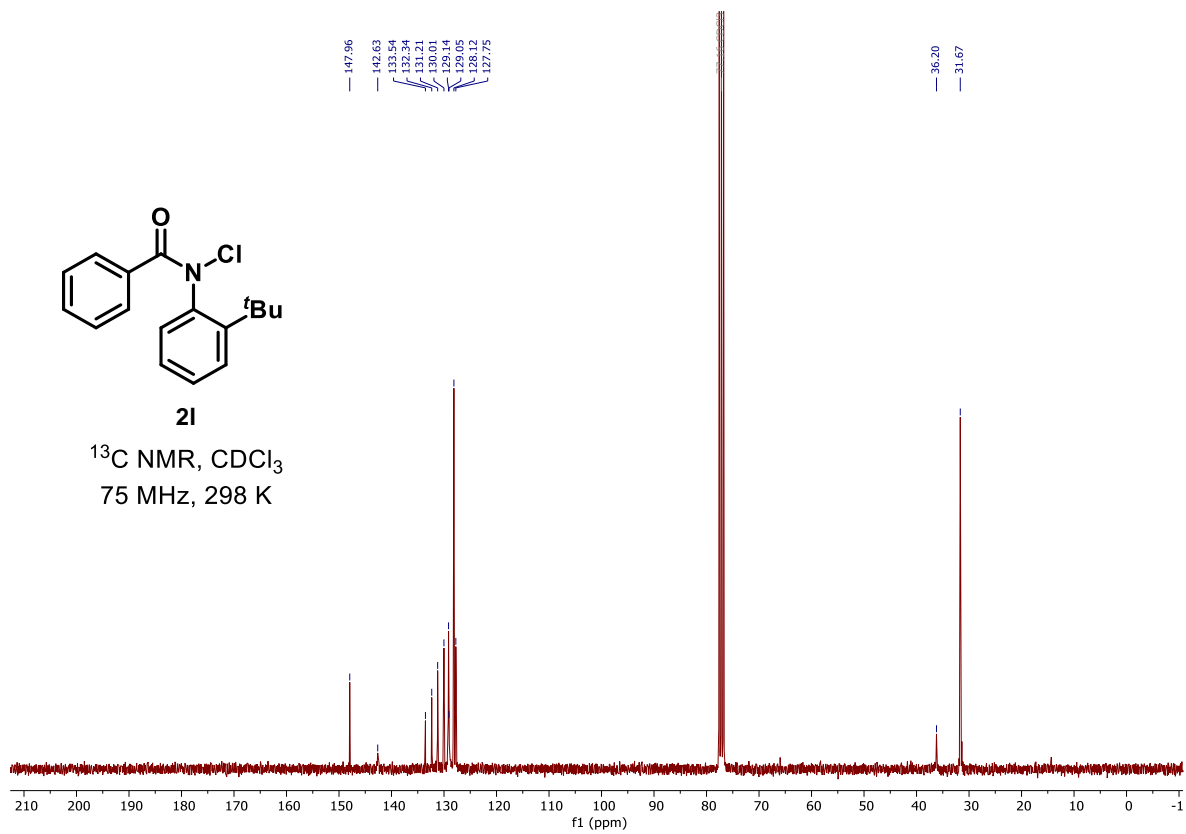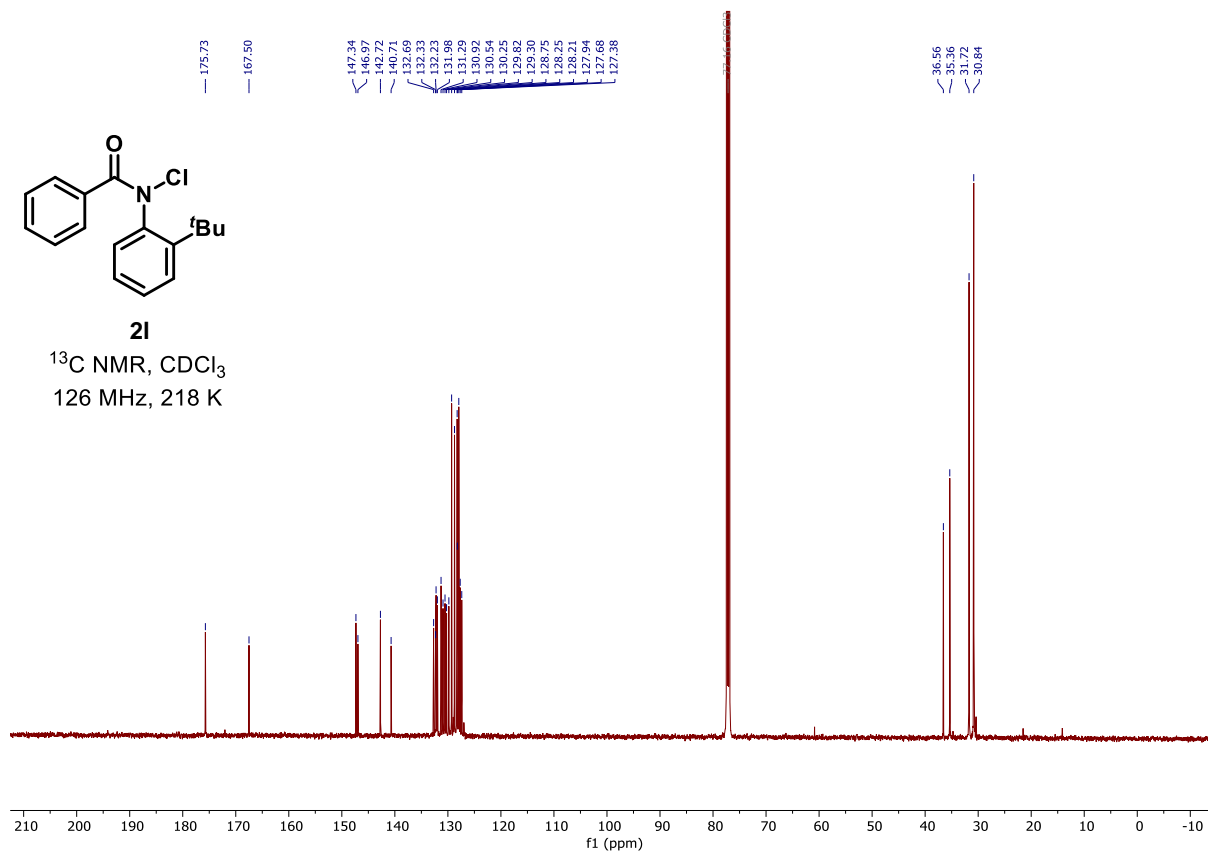

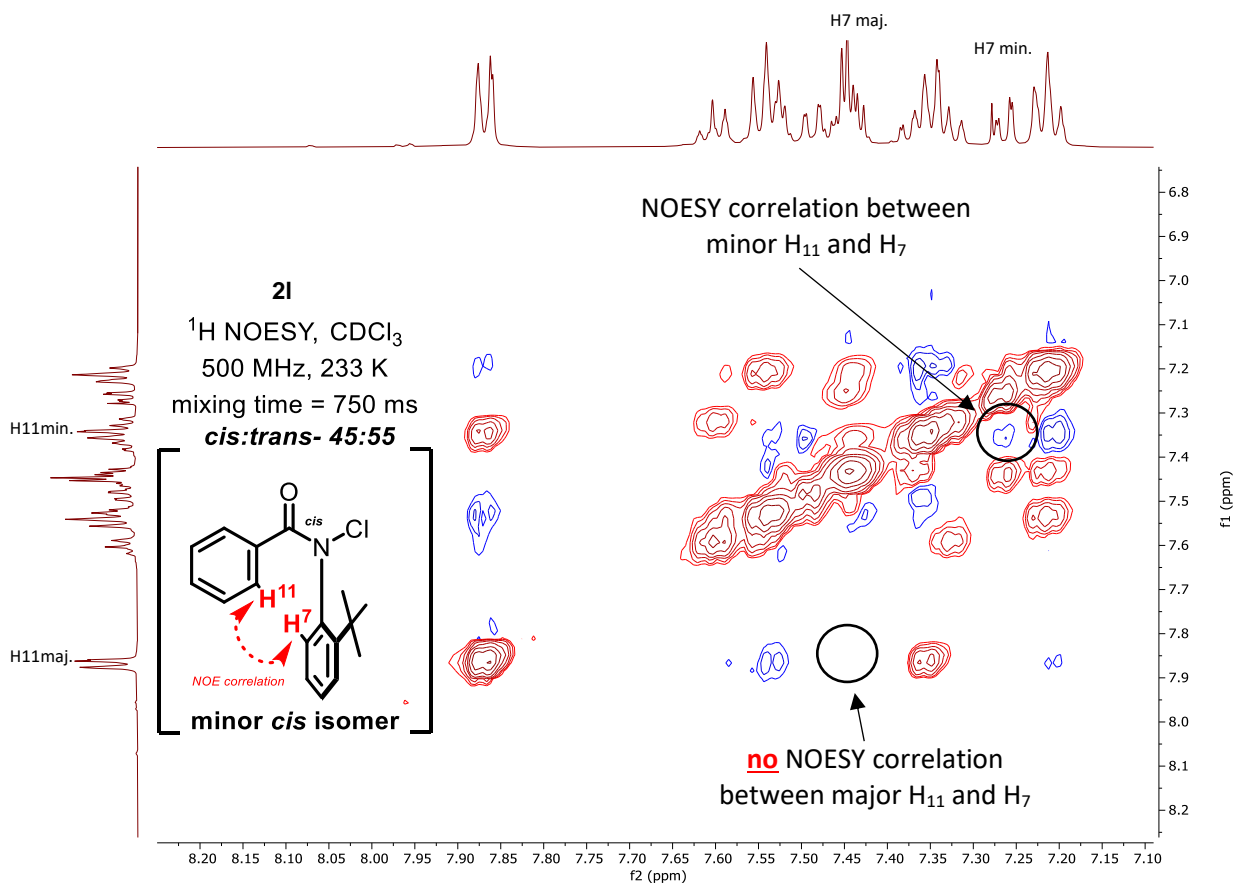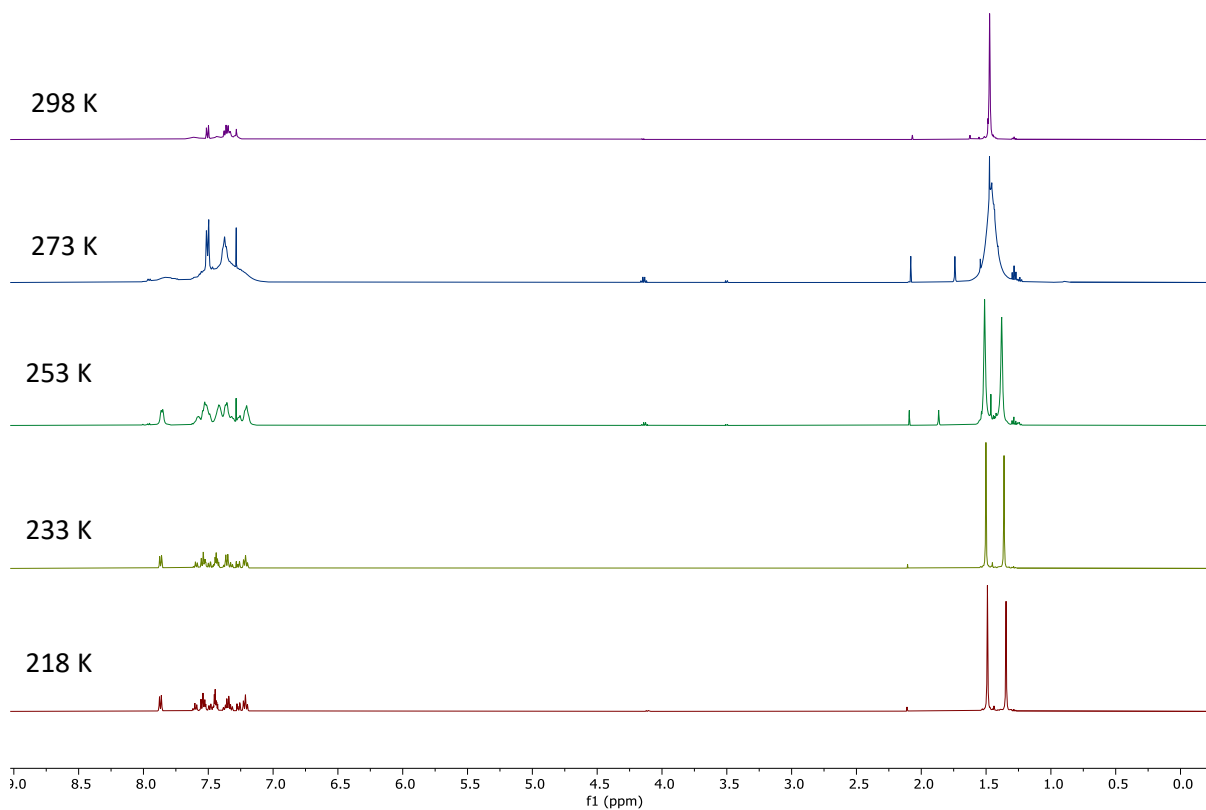

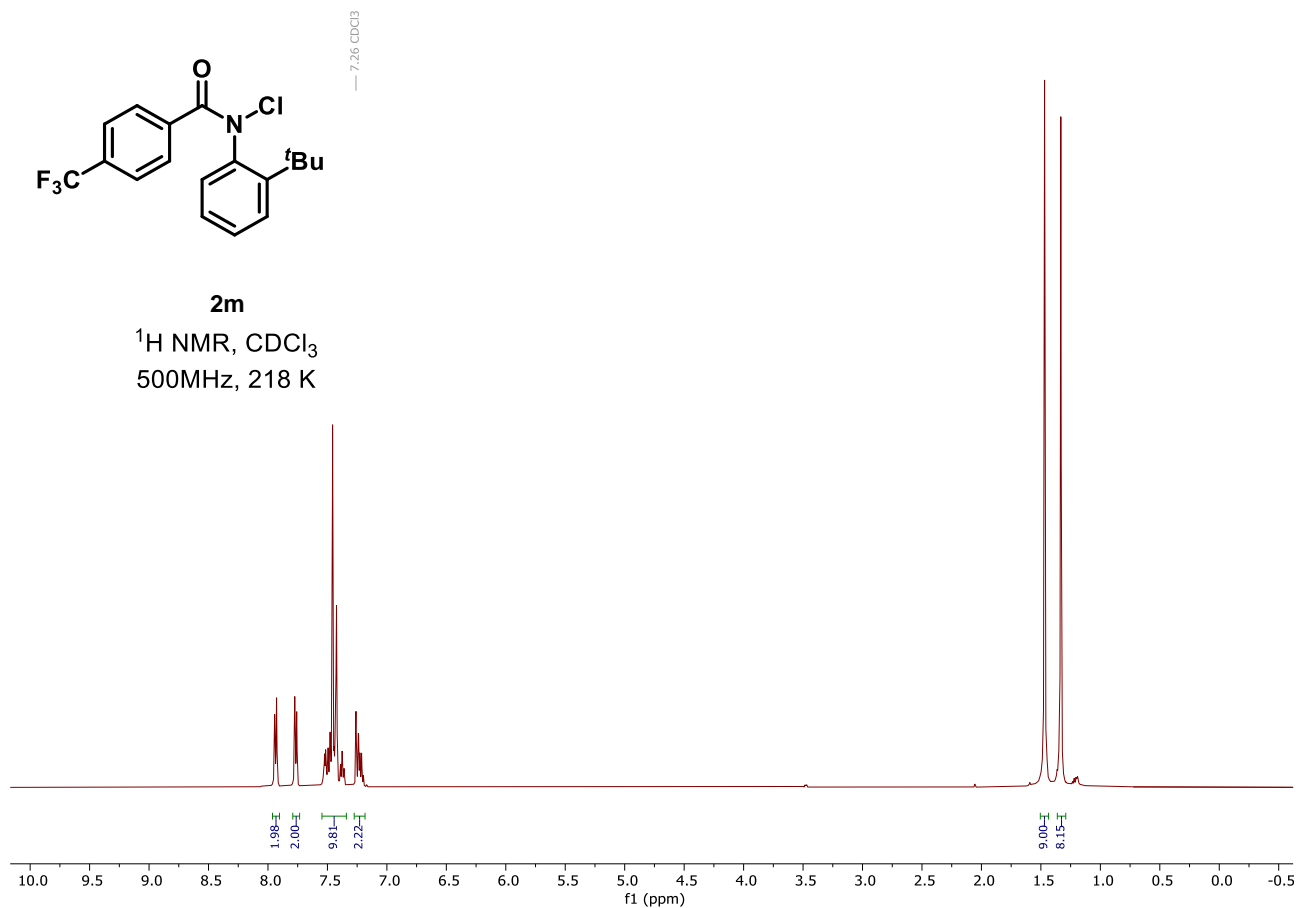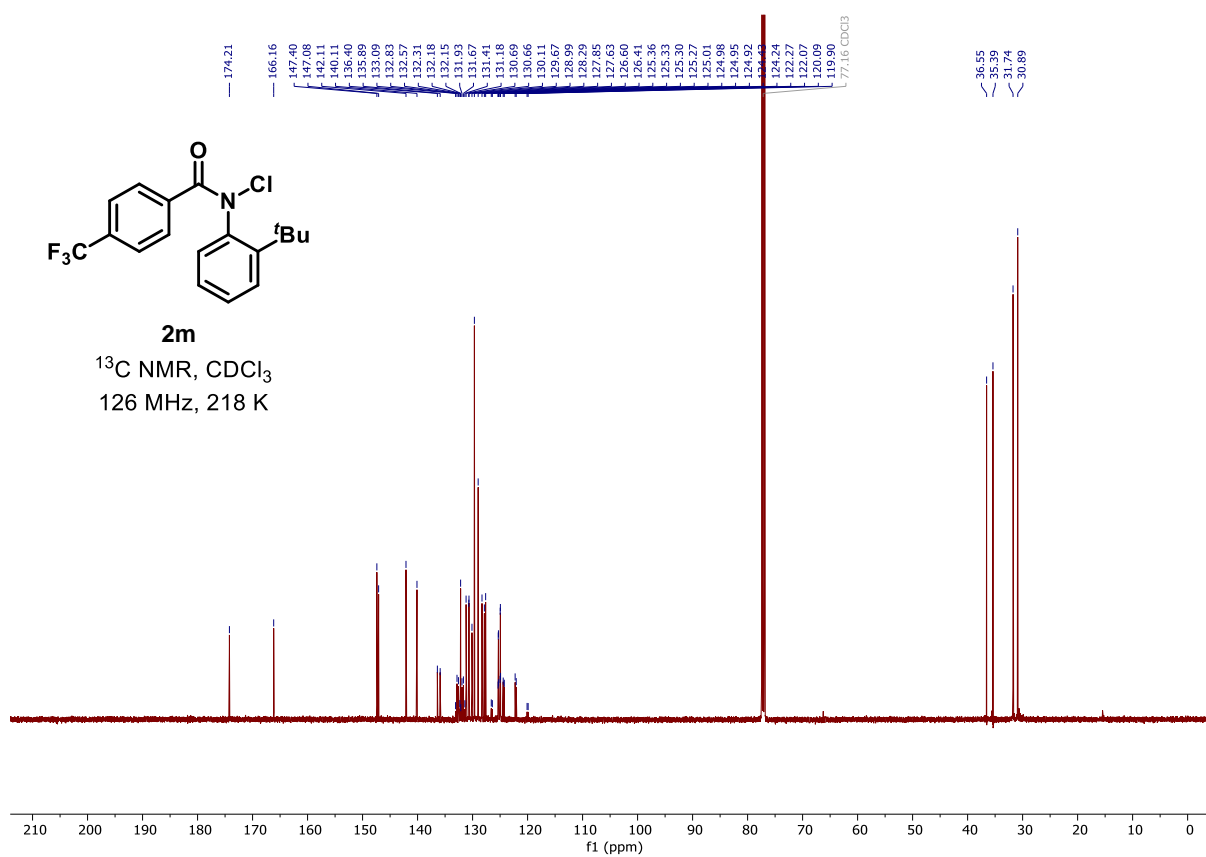

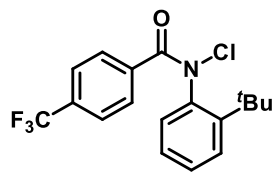

**2m**

<sup>19</sup>F NMR, CDCl<sub>3</sub>  
282 MHz, 298 K

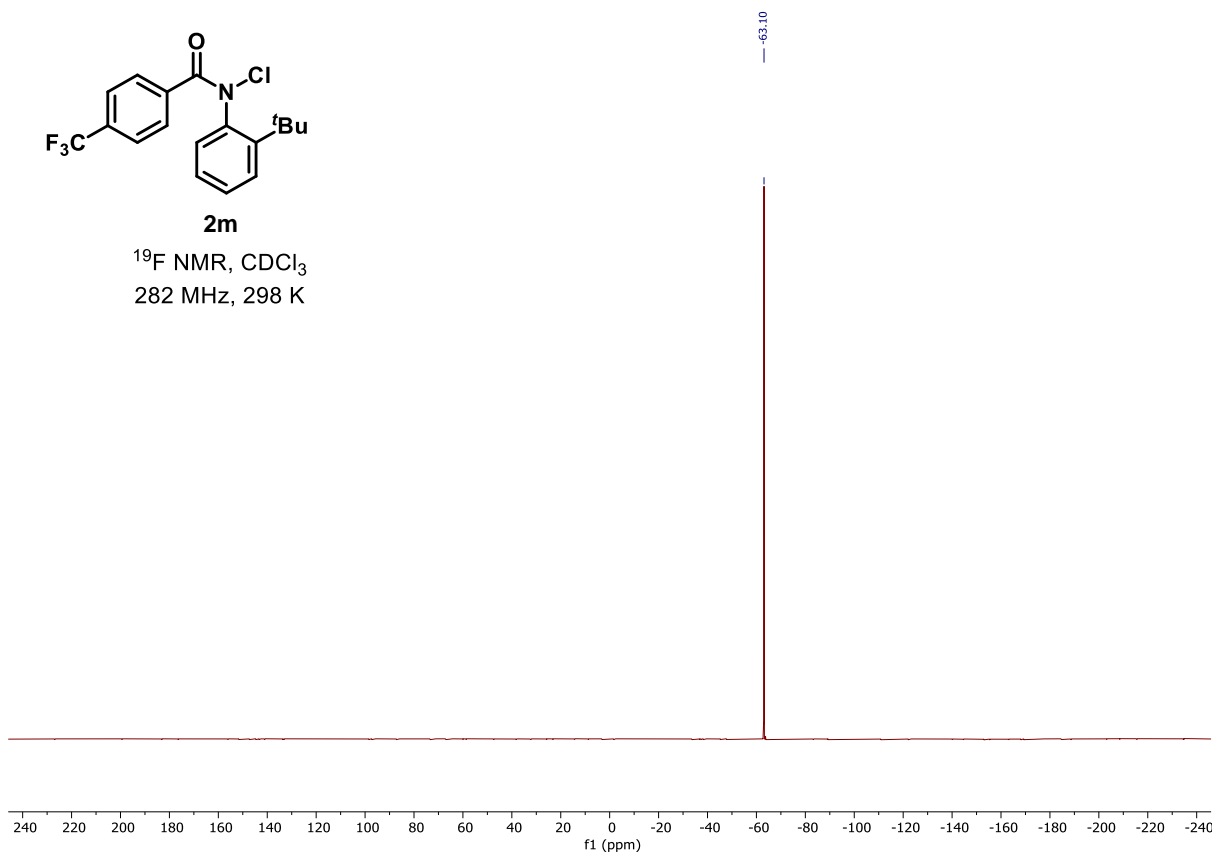

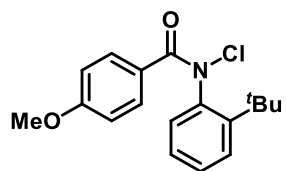

**2n**

<sup>1</sup>H NMR, CDCl<sub>3</sub>  
300 MHz, 298K

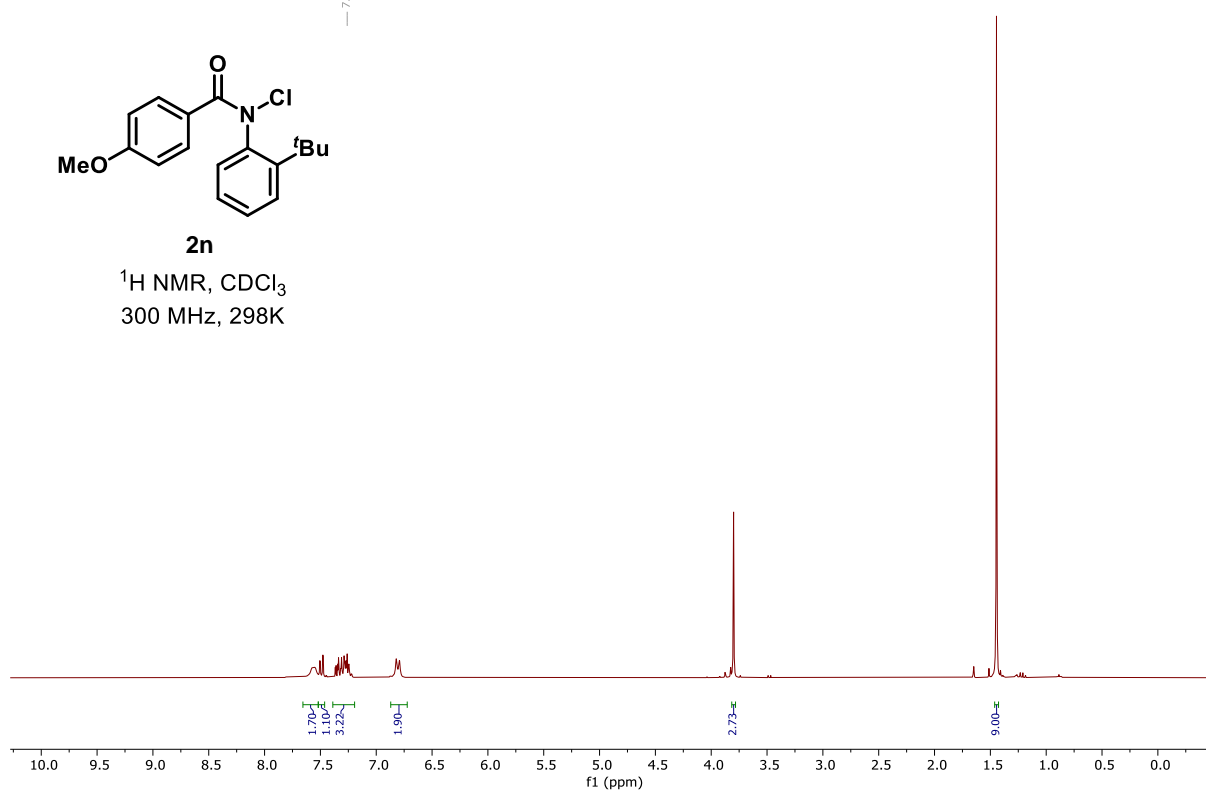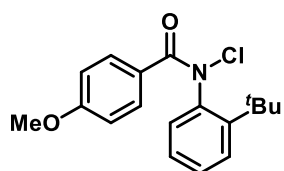

**2n**

<sup>13</sup>C NMR, CDCl<sub>3</sub>  
75 MHz, 298K

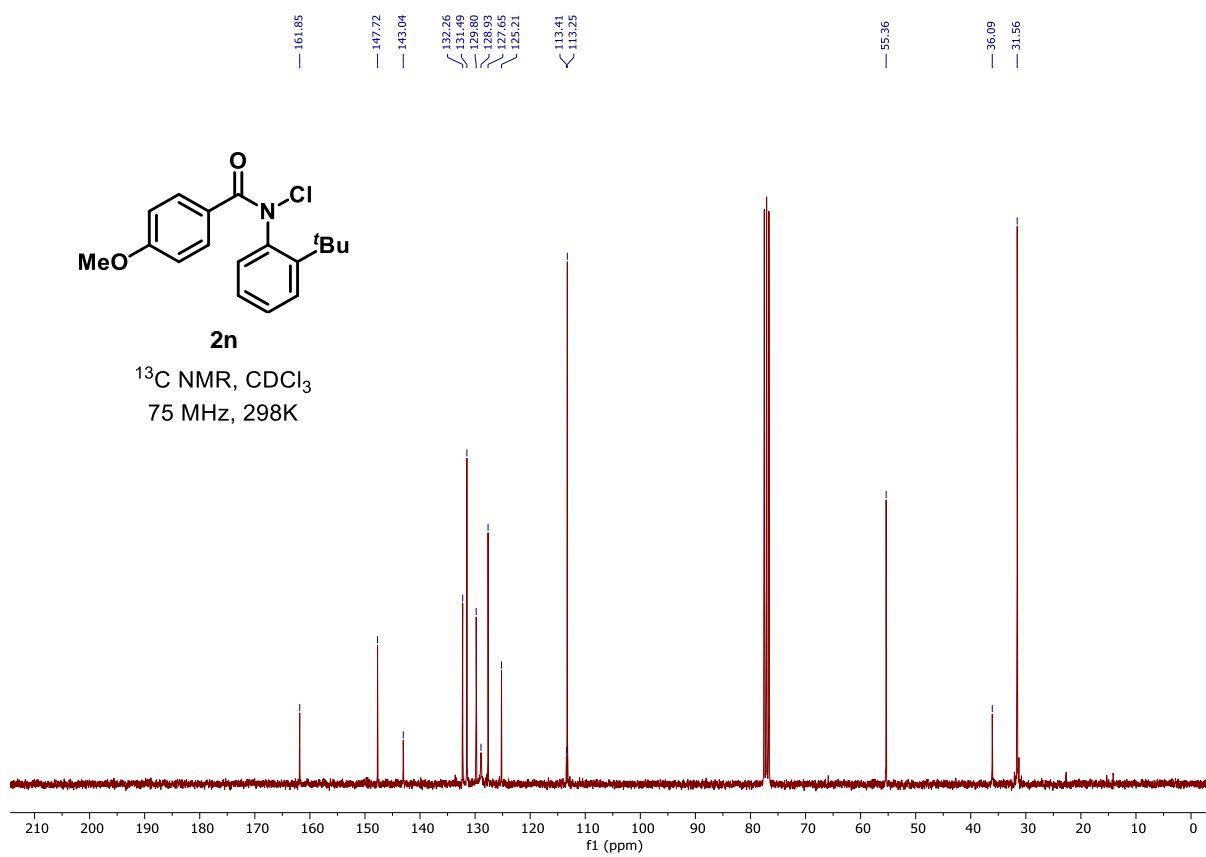

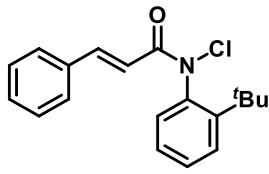

**2o**

$^1\text{H}$  NMR,  $\text{CDCl}_3$   
500 MHz, 218K

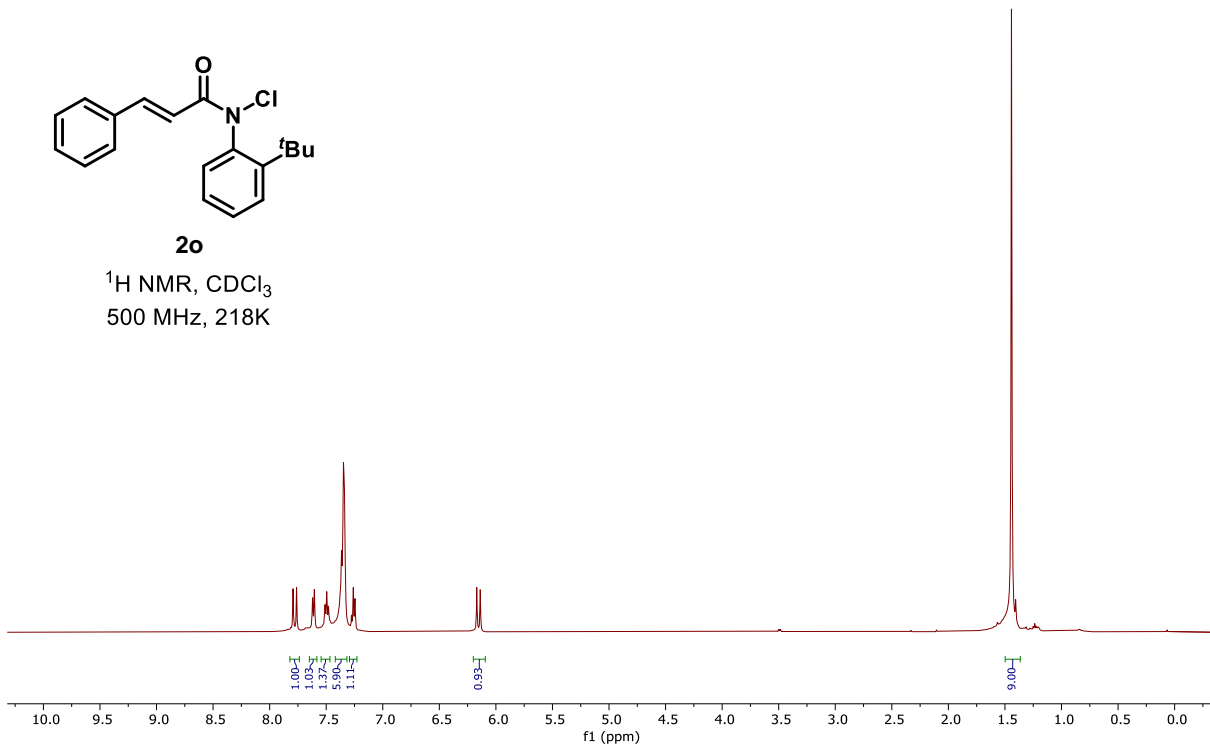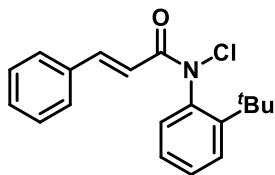

**2o**

$^{13}\text{C}$  NMR,  $\text{CDCl}_3$   
126 MHz, 218K

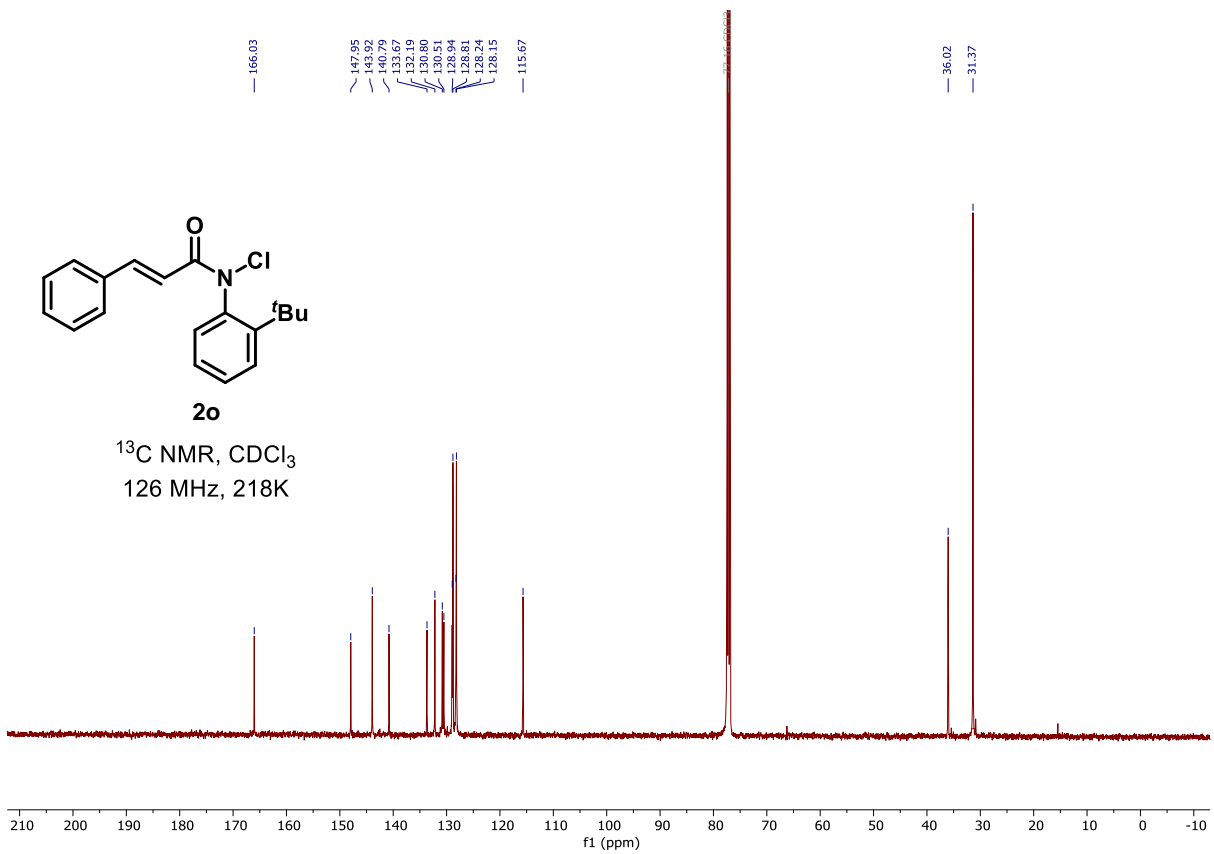

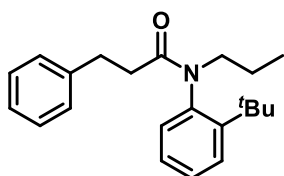

**3a**

$^1\text{H NMR}$ ,  $\text{CDCl}_3$   
400 MHz, 298K

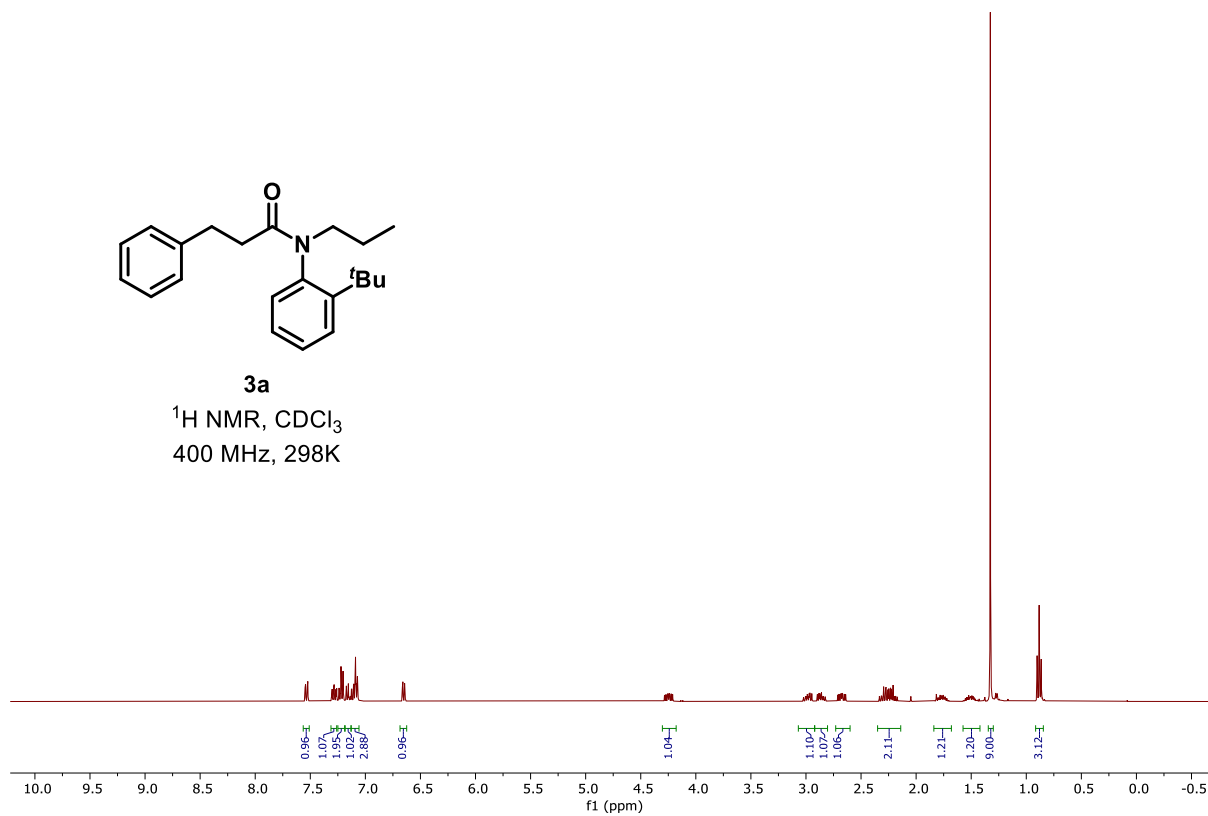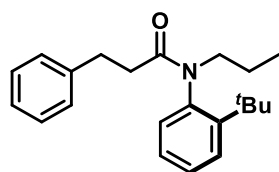

**3a**

$^{13}\text{C NMR}$ ,  $\text{CDCl}_3$   
75 MHz, 298 K

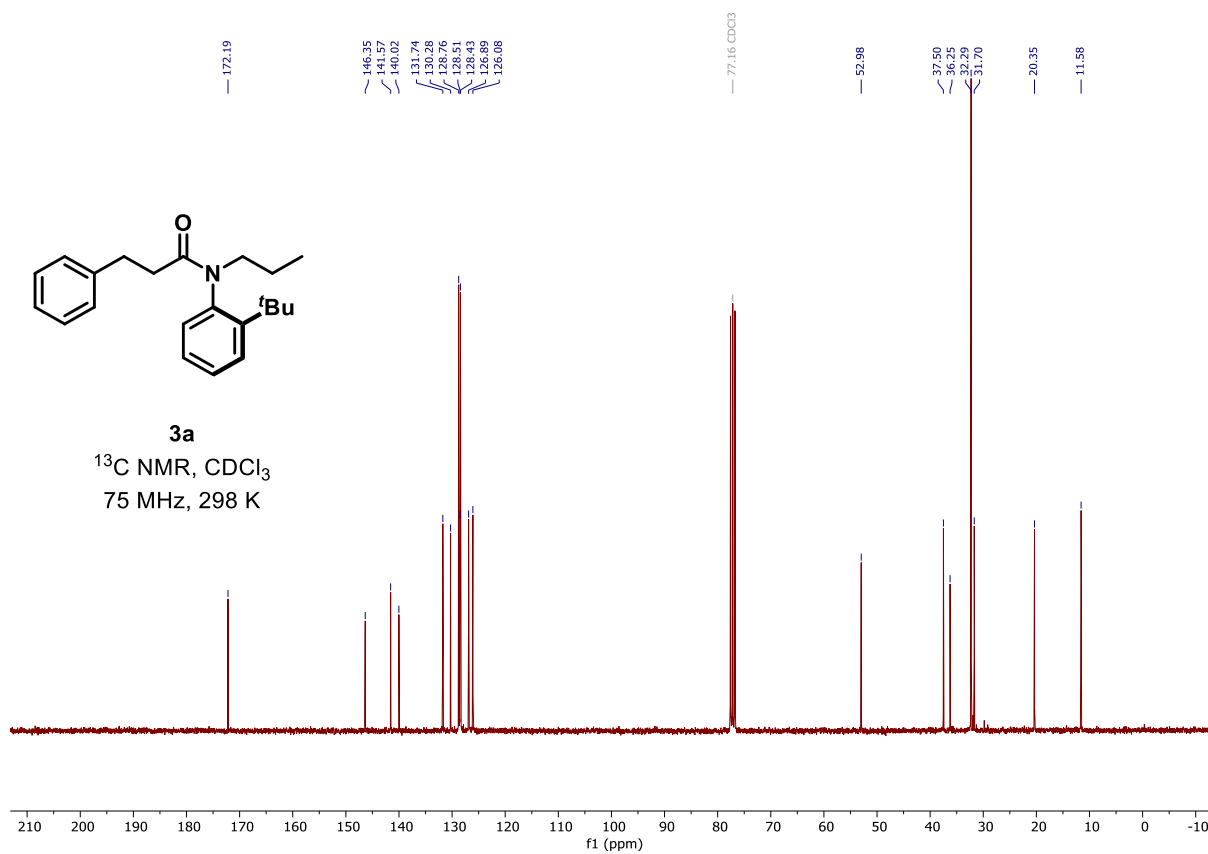



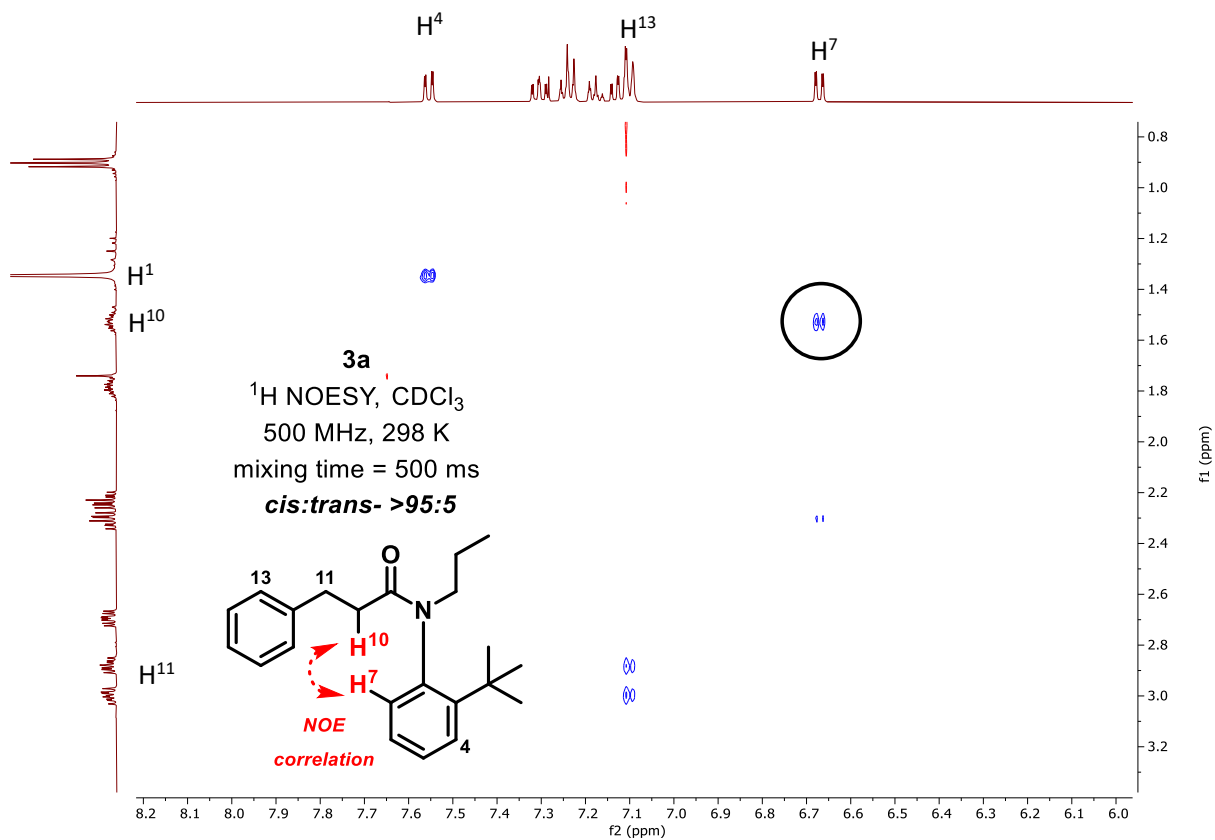

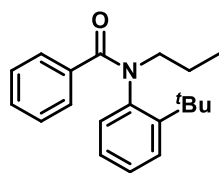

**3b**

<sup>1</sup>H NMR, CDCl<sub>3</sub>  
700 MHz, 298K  
77:23 *cis:trans*

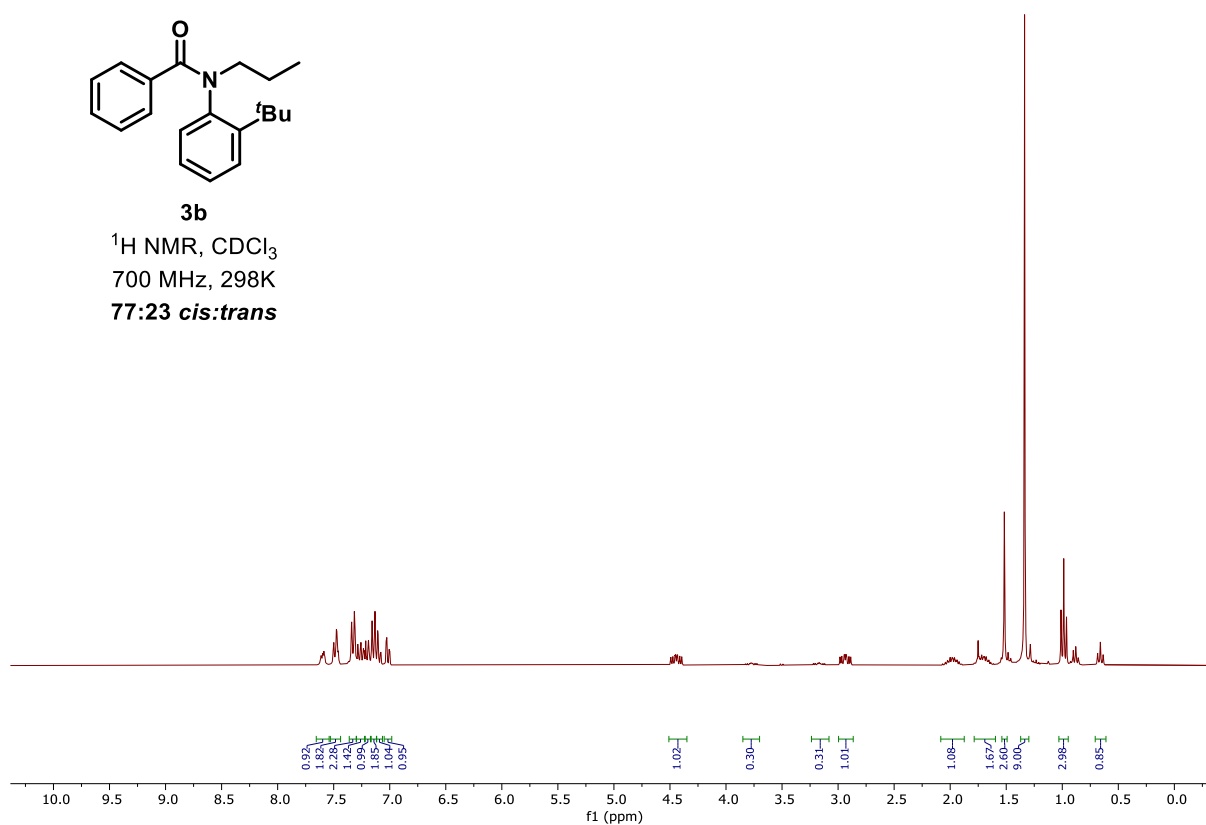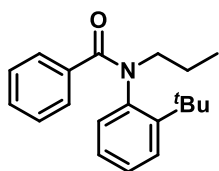

**3b**

<sup>13</sup>C NMR, CDCl<sub>3</sub>  
176 MHz, 298K  
*cis/trans*: 77:23

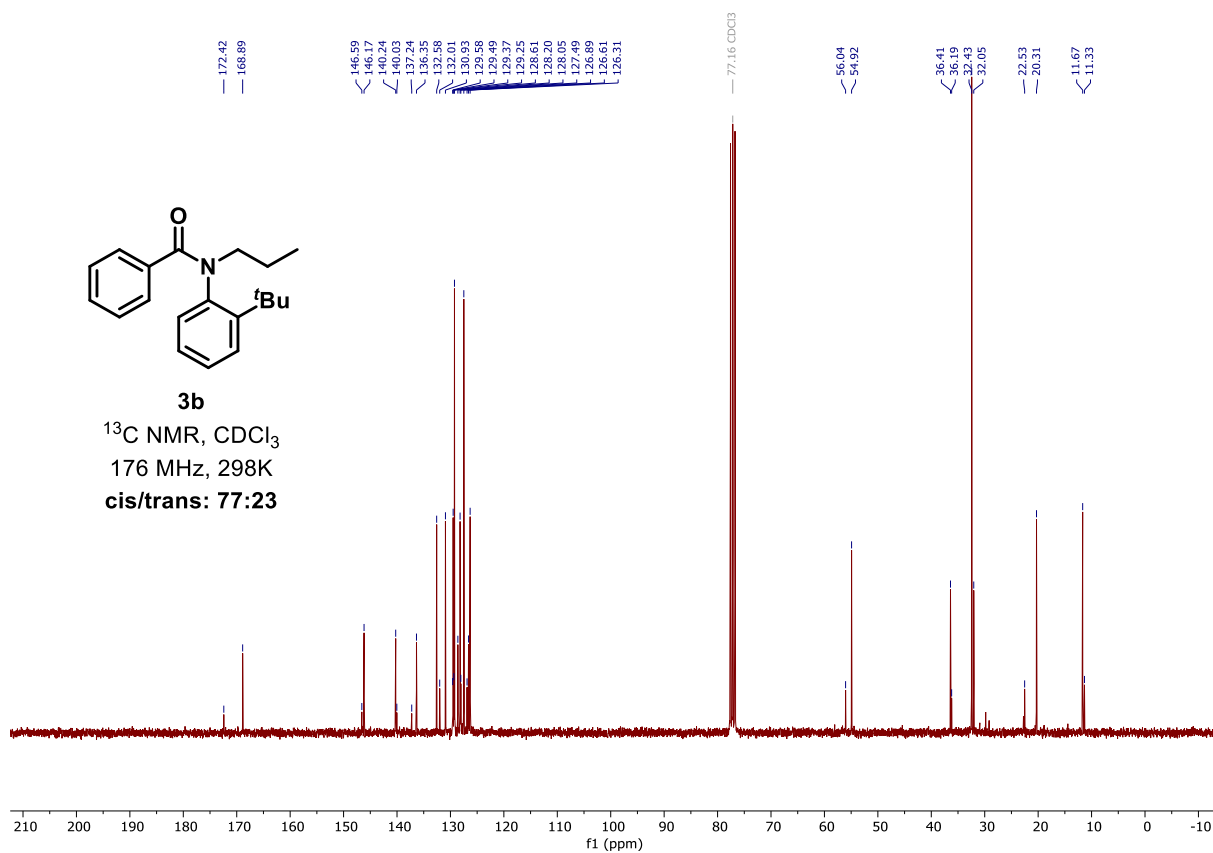

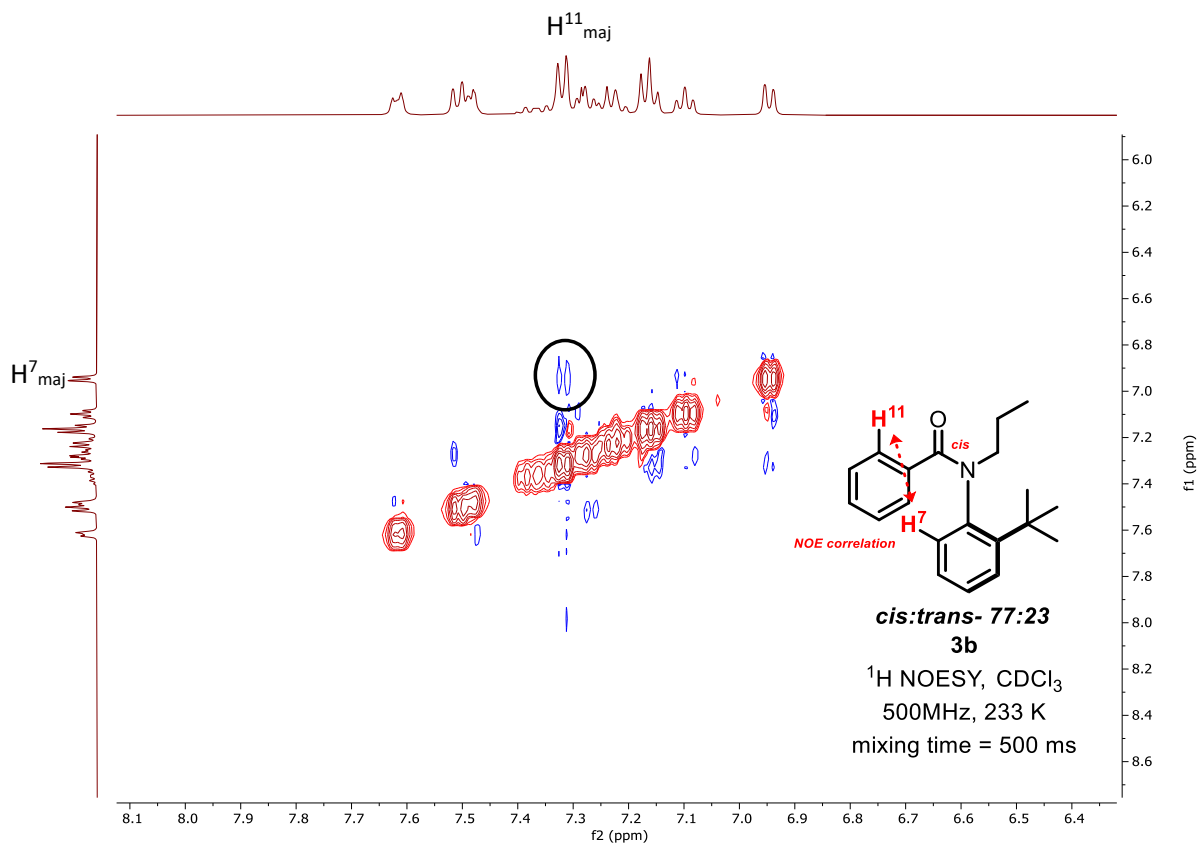

Supplement: d4cc00268g2.pdf [file d4cc00268g2.pdf]
